# Supplementary material for: Structure–Reactivity Studies of 2-Sulfonylpyrimidines Allow Selective Protein Arylation
Source: PubMed Central journal article supplement (PMC10515483; doi:10.1021/acs.bioconjchem.3c00322), 2023-09-01

2-Cl 4-COOMe

9.07  
9.05

8.07  
8.05

1H NMR (400 MHz, DMSO-d6)

3.93

3.31

2.50

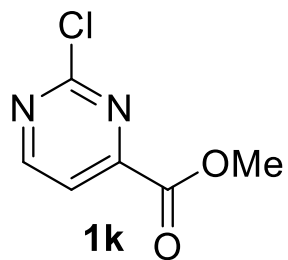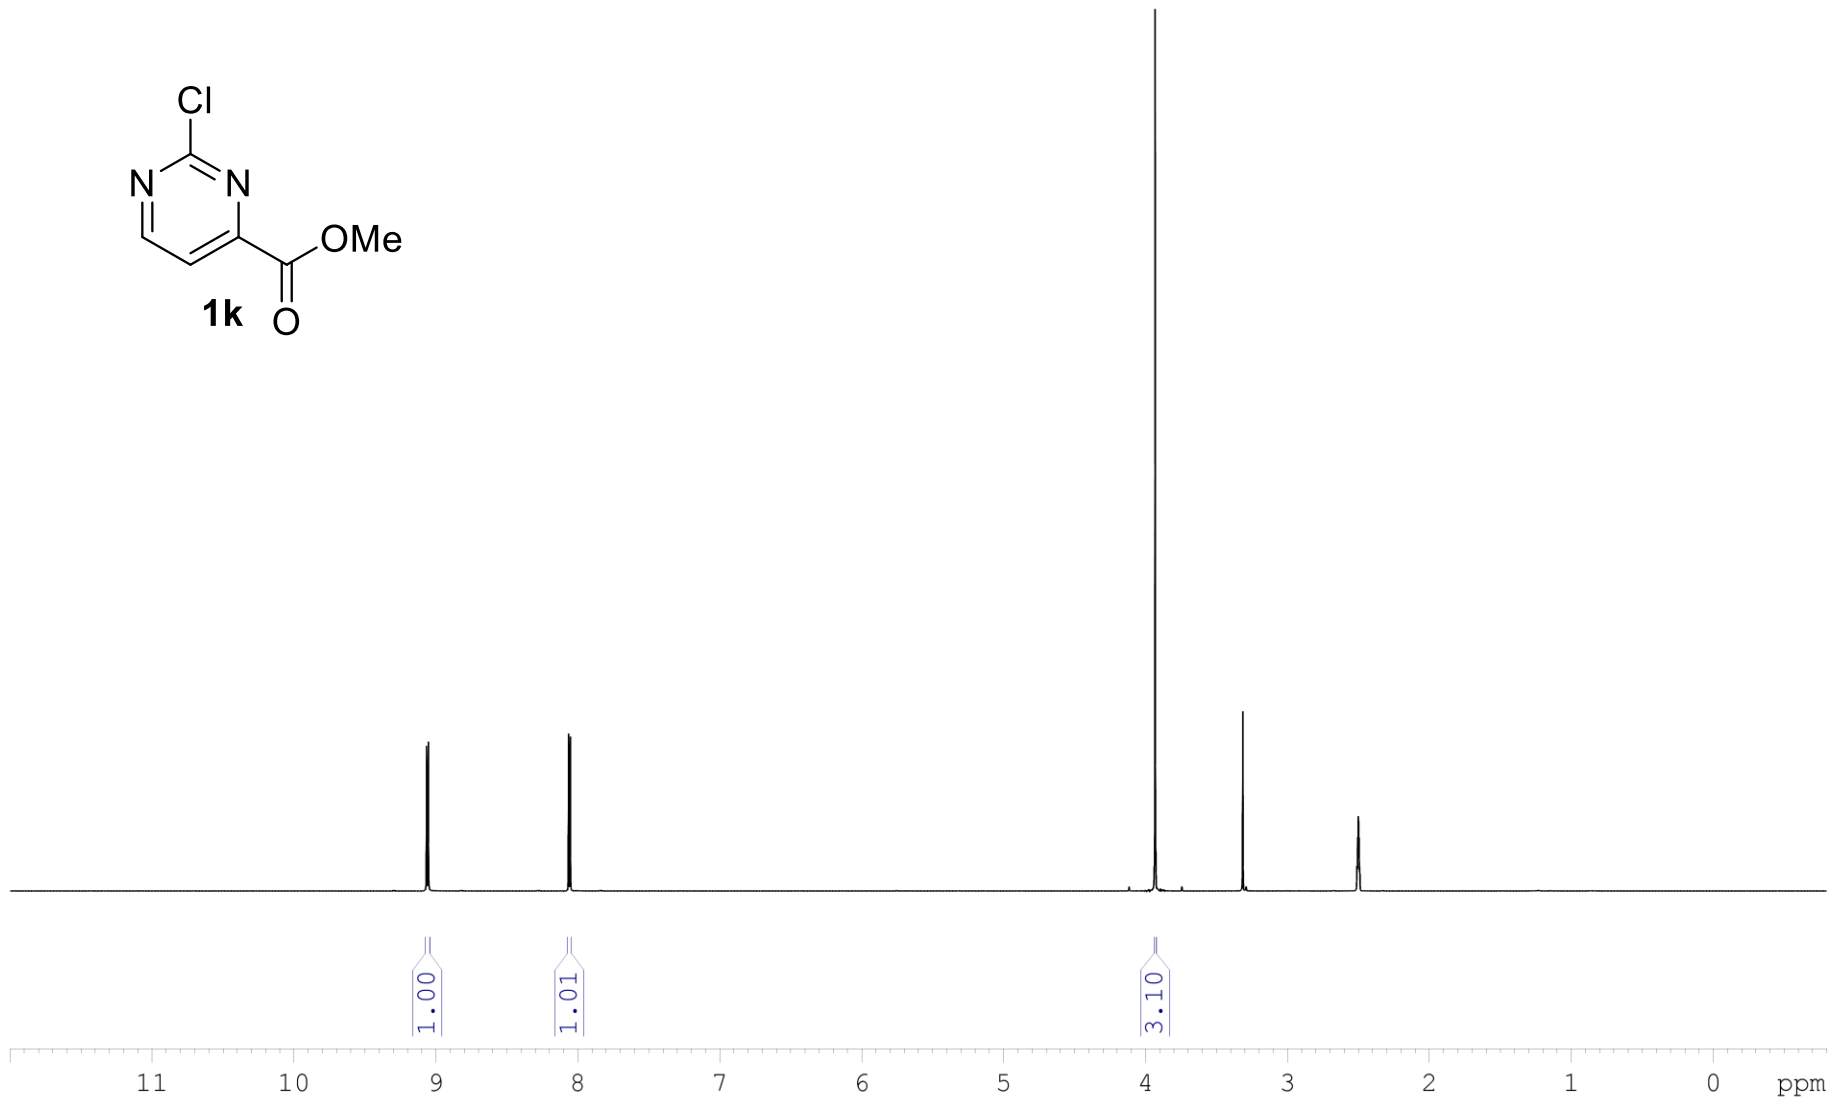

2-Cl 4-COOMe

163.21  
162.89  
160.37  
157.08

120.09

<sup>13</sup>C NMR (100 MHz, DMSO-d<sub>6</sub>)

53.29

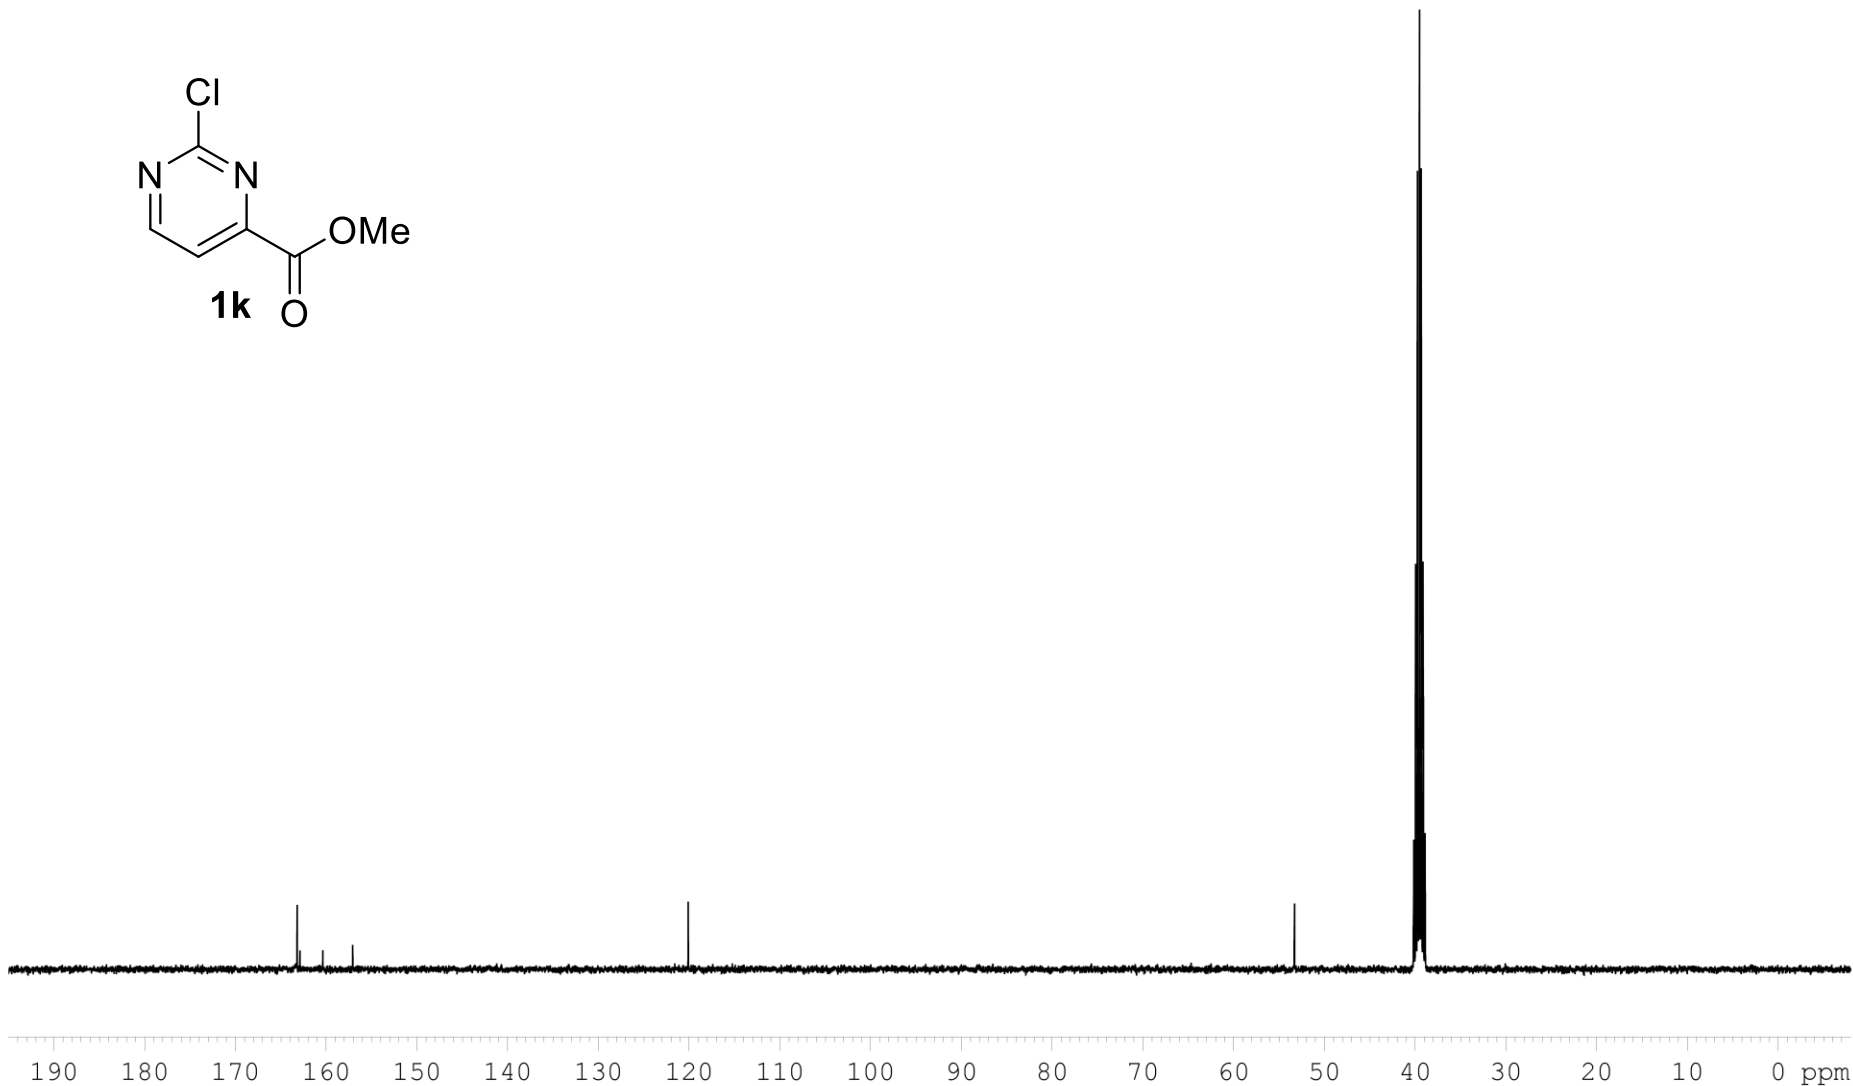

2-Cl 5-COOMe  
1H NMR (400 MHz, DMSO-d6)

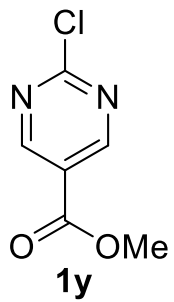

9.19

3.92

3.33

2.50

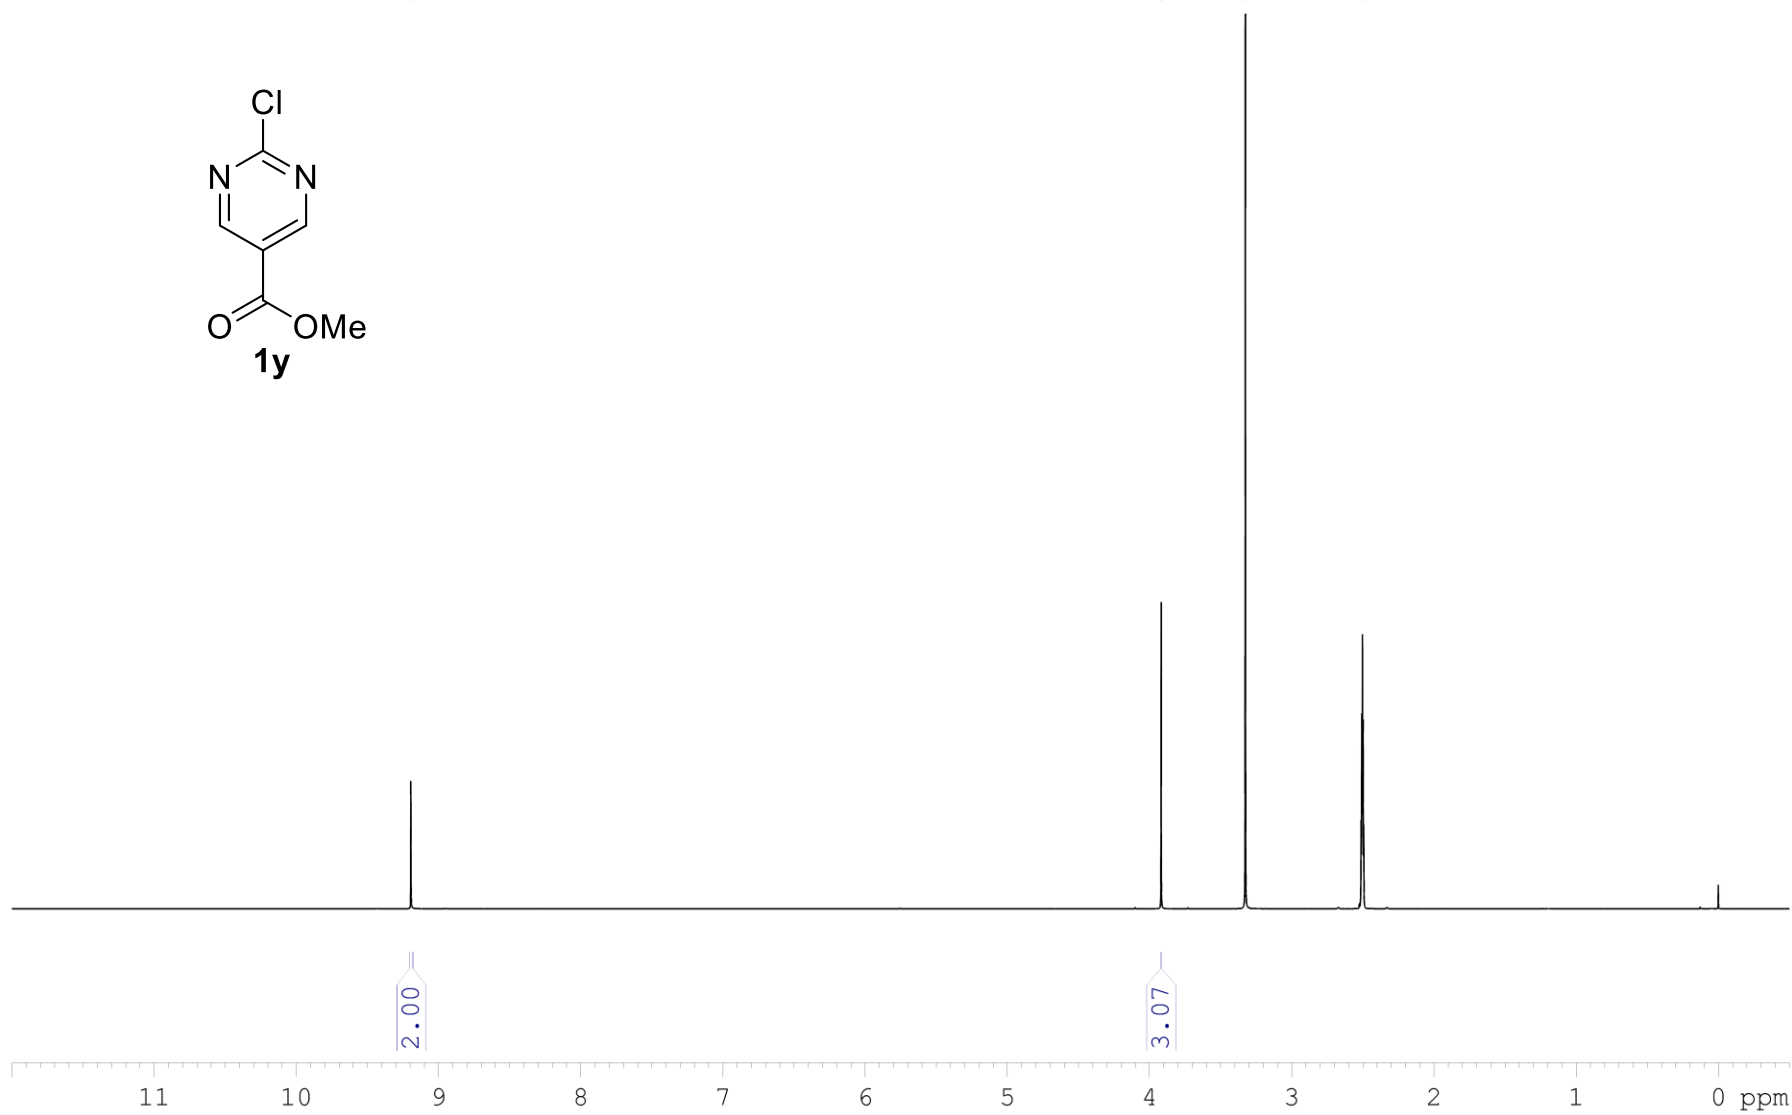

2-Cl 5-COOMe



163.20  
163.14  
160.89

123.24

<sup>13</sup>C NMR (100 MHz, DMSO-d<sub>6</sub>)

52.85

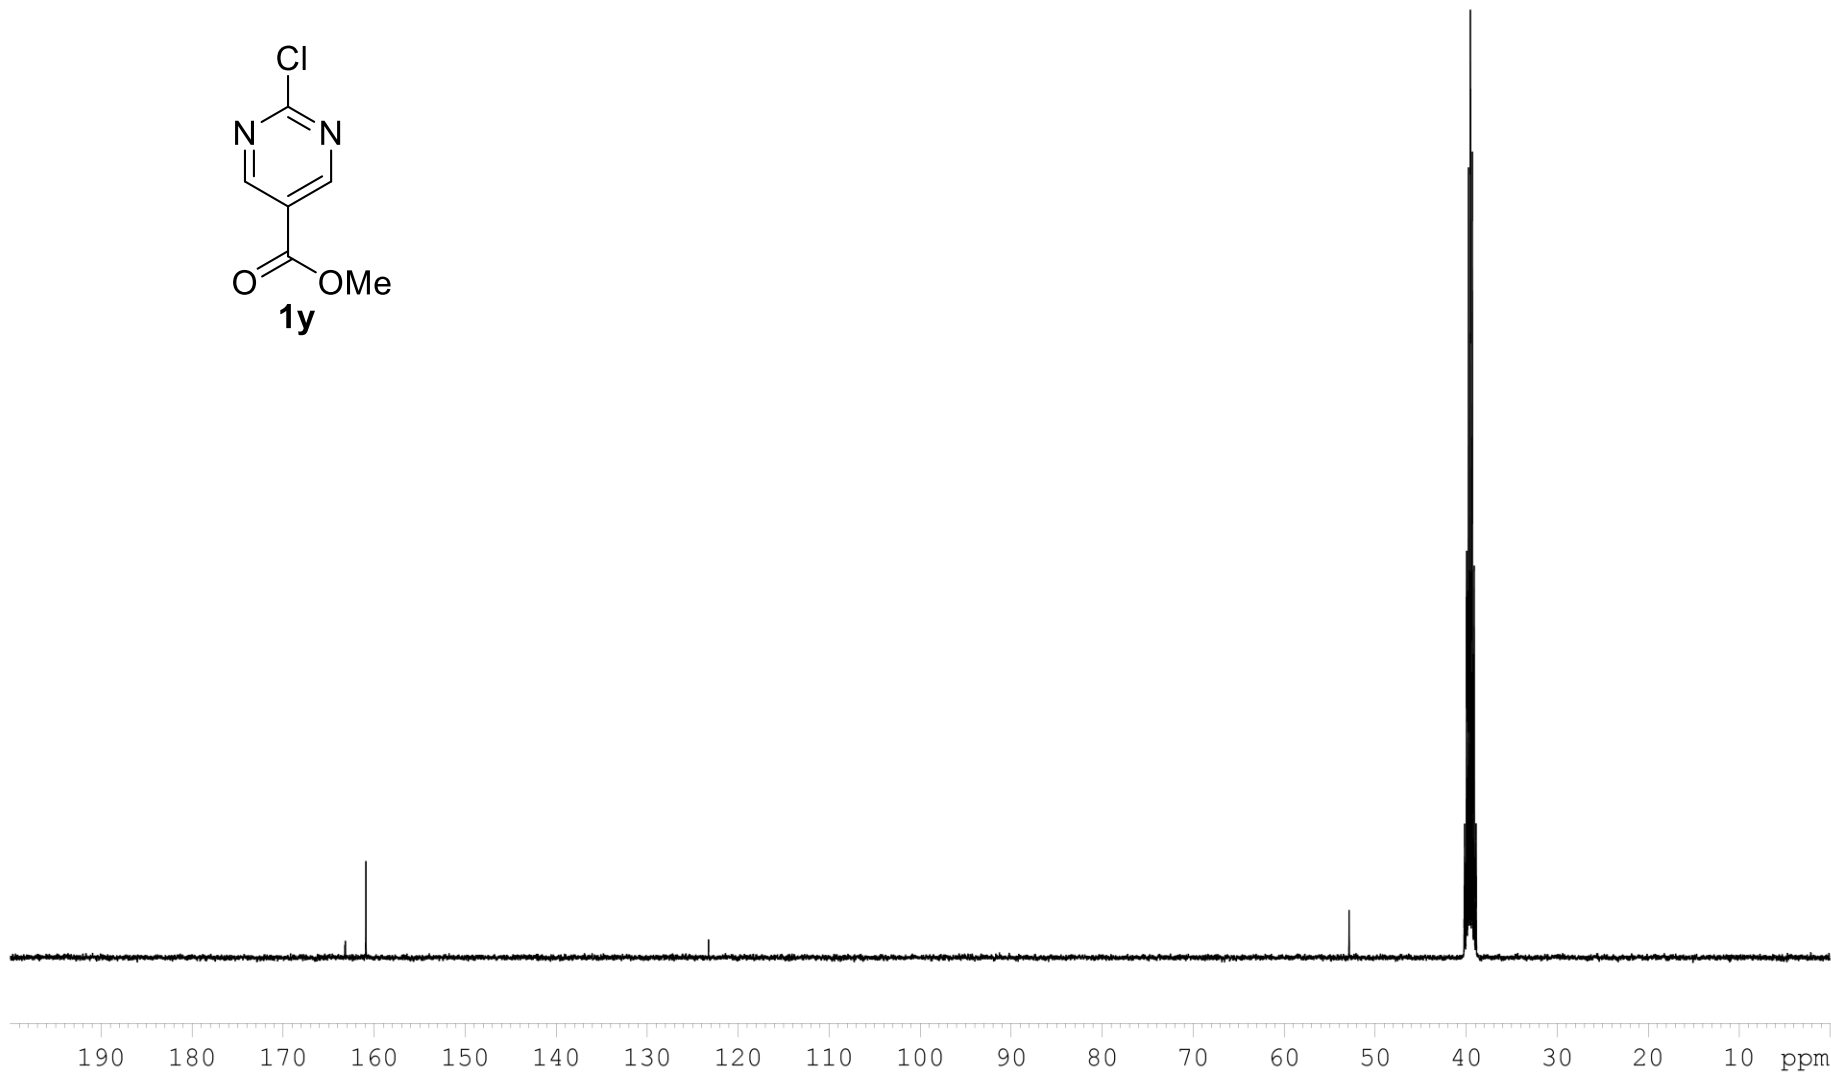

2-SMe 4-OMe  
1H NMR (400 MHz, DMSO-d6)

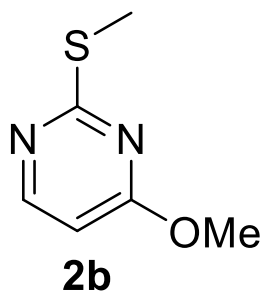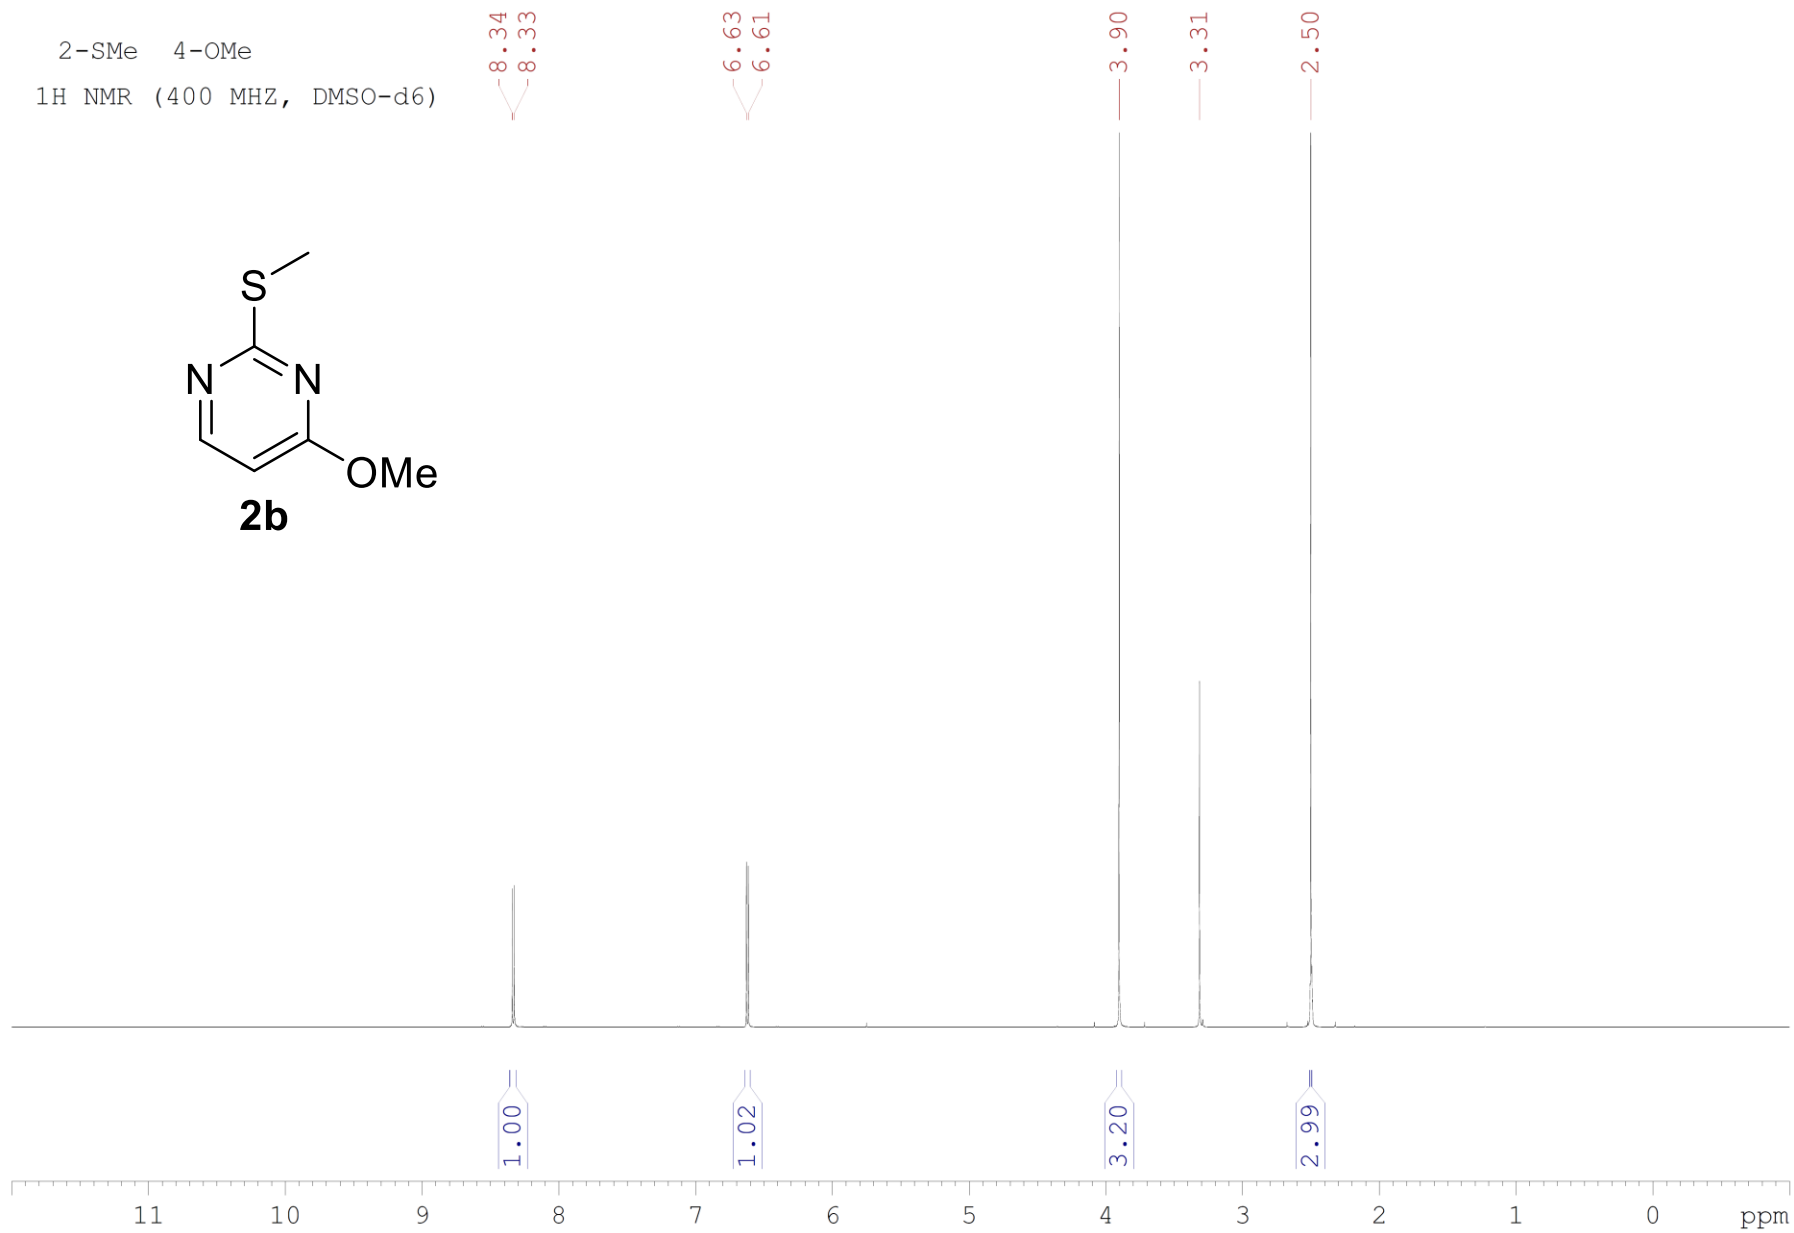

2-SMe 4-Me  
1H NMR (400 MHz, DMSO-d6)

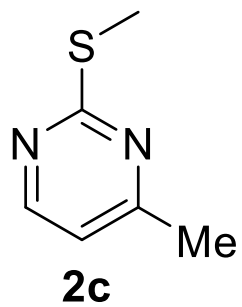

8.48  
8.46

7.08  
7.07

3.32

2.48  
2.40

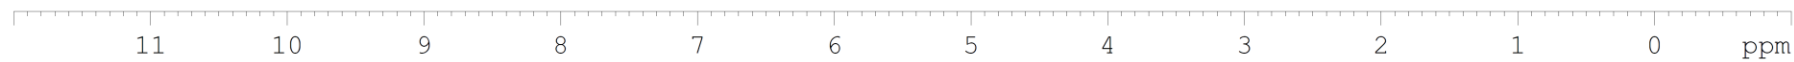

2-SMe 4-COOH

8.82  
8.81

7.59  
7.58

<sup>1</sup>H NMR (400 MHz, DMSO-d<sub>6</sub>)

3.39

2.55

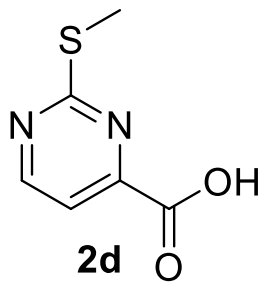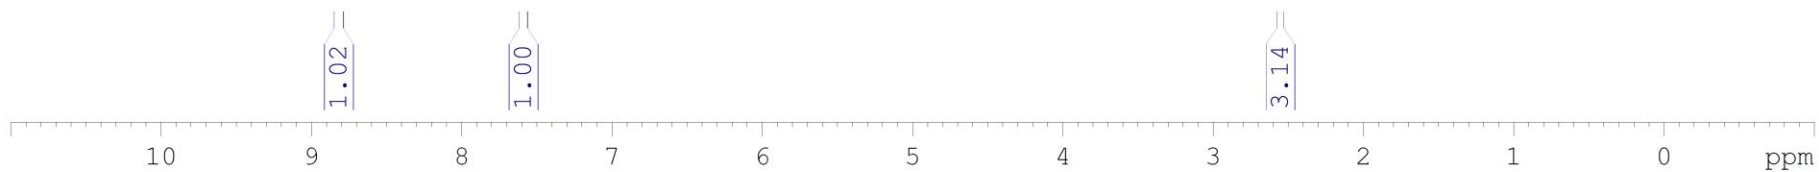

2-SMe 4-Ph

<sup>1</sup>H NMR (400 MHz, DMSO-d<sub>6</sub>)

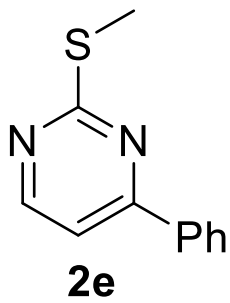

8.69  
8.67  
8.21  
8.20  
8.19  
8.18  
7.78  
7.76  
7.57  
7.56  
7.55

3.34

2.59

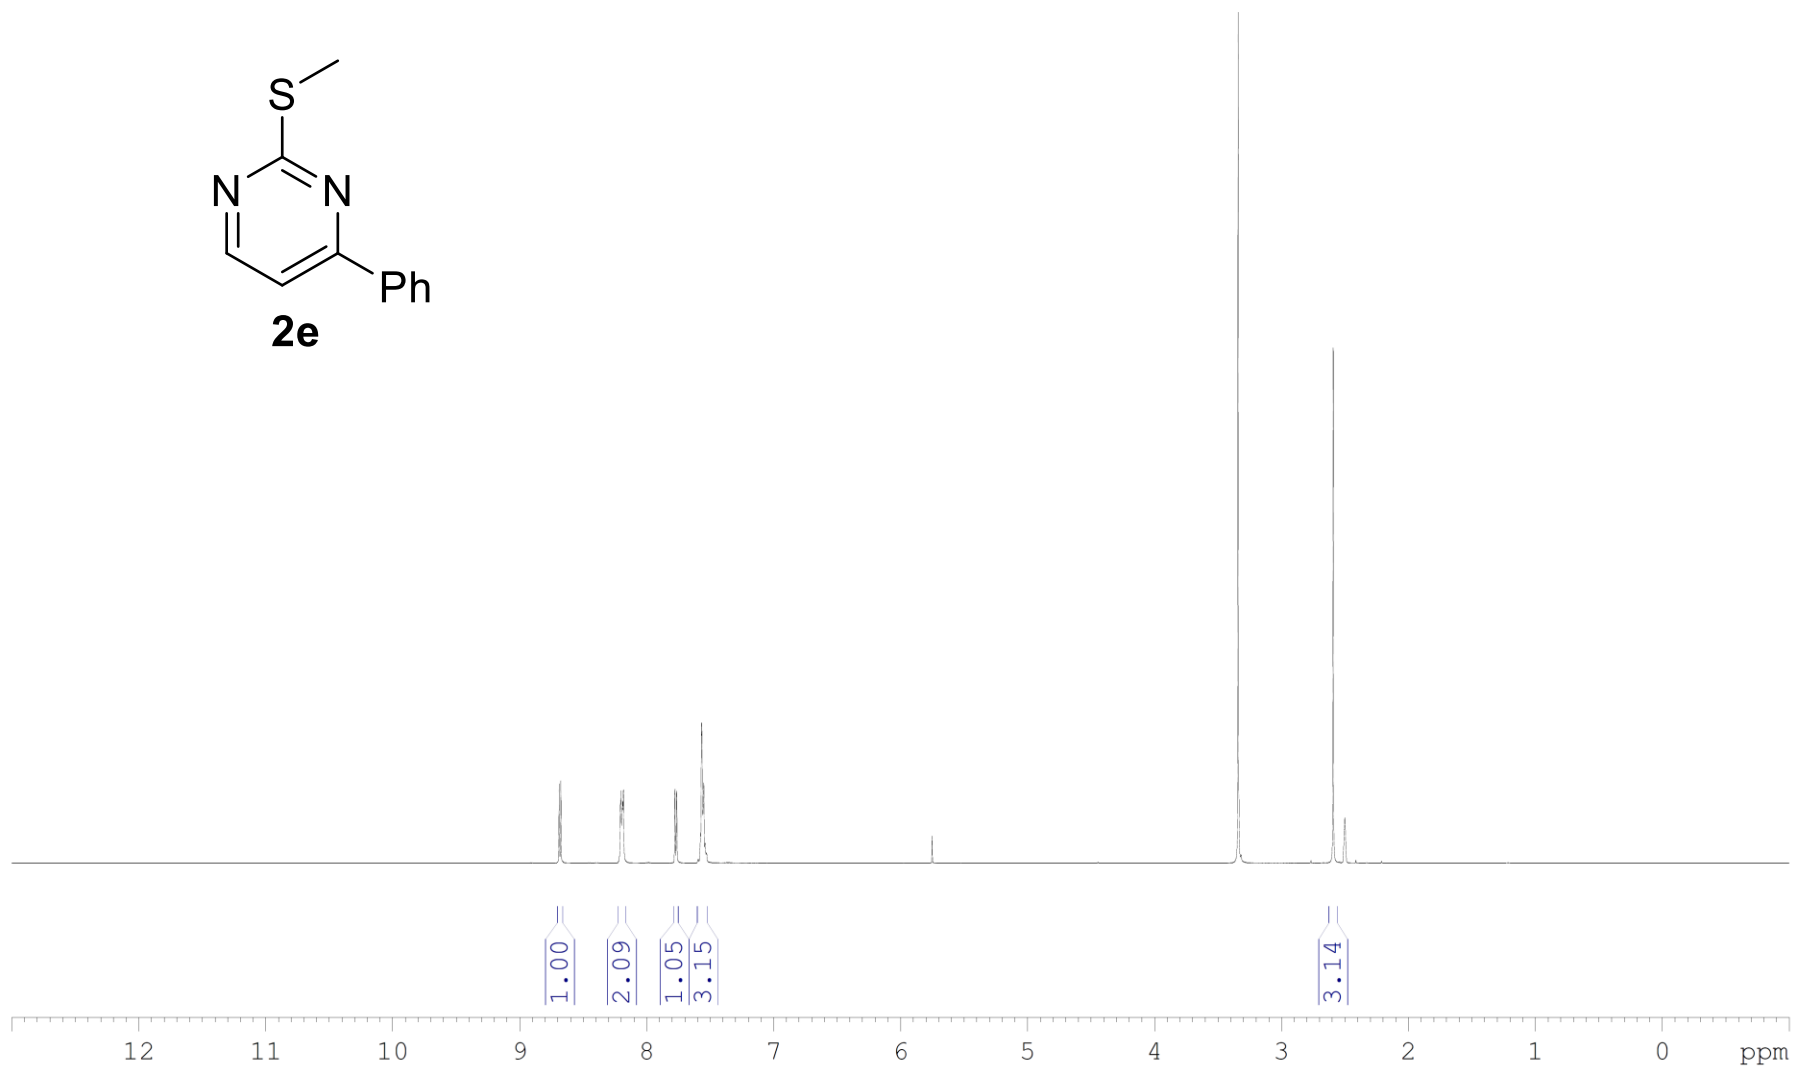



2-SMe 4-NH<sub>2</sub>

<sup>1</sup>H NMR (400 MHz, DMSO-d<sub>6</sub>)

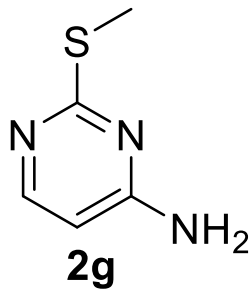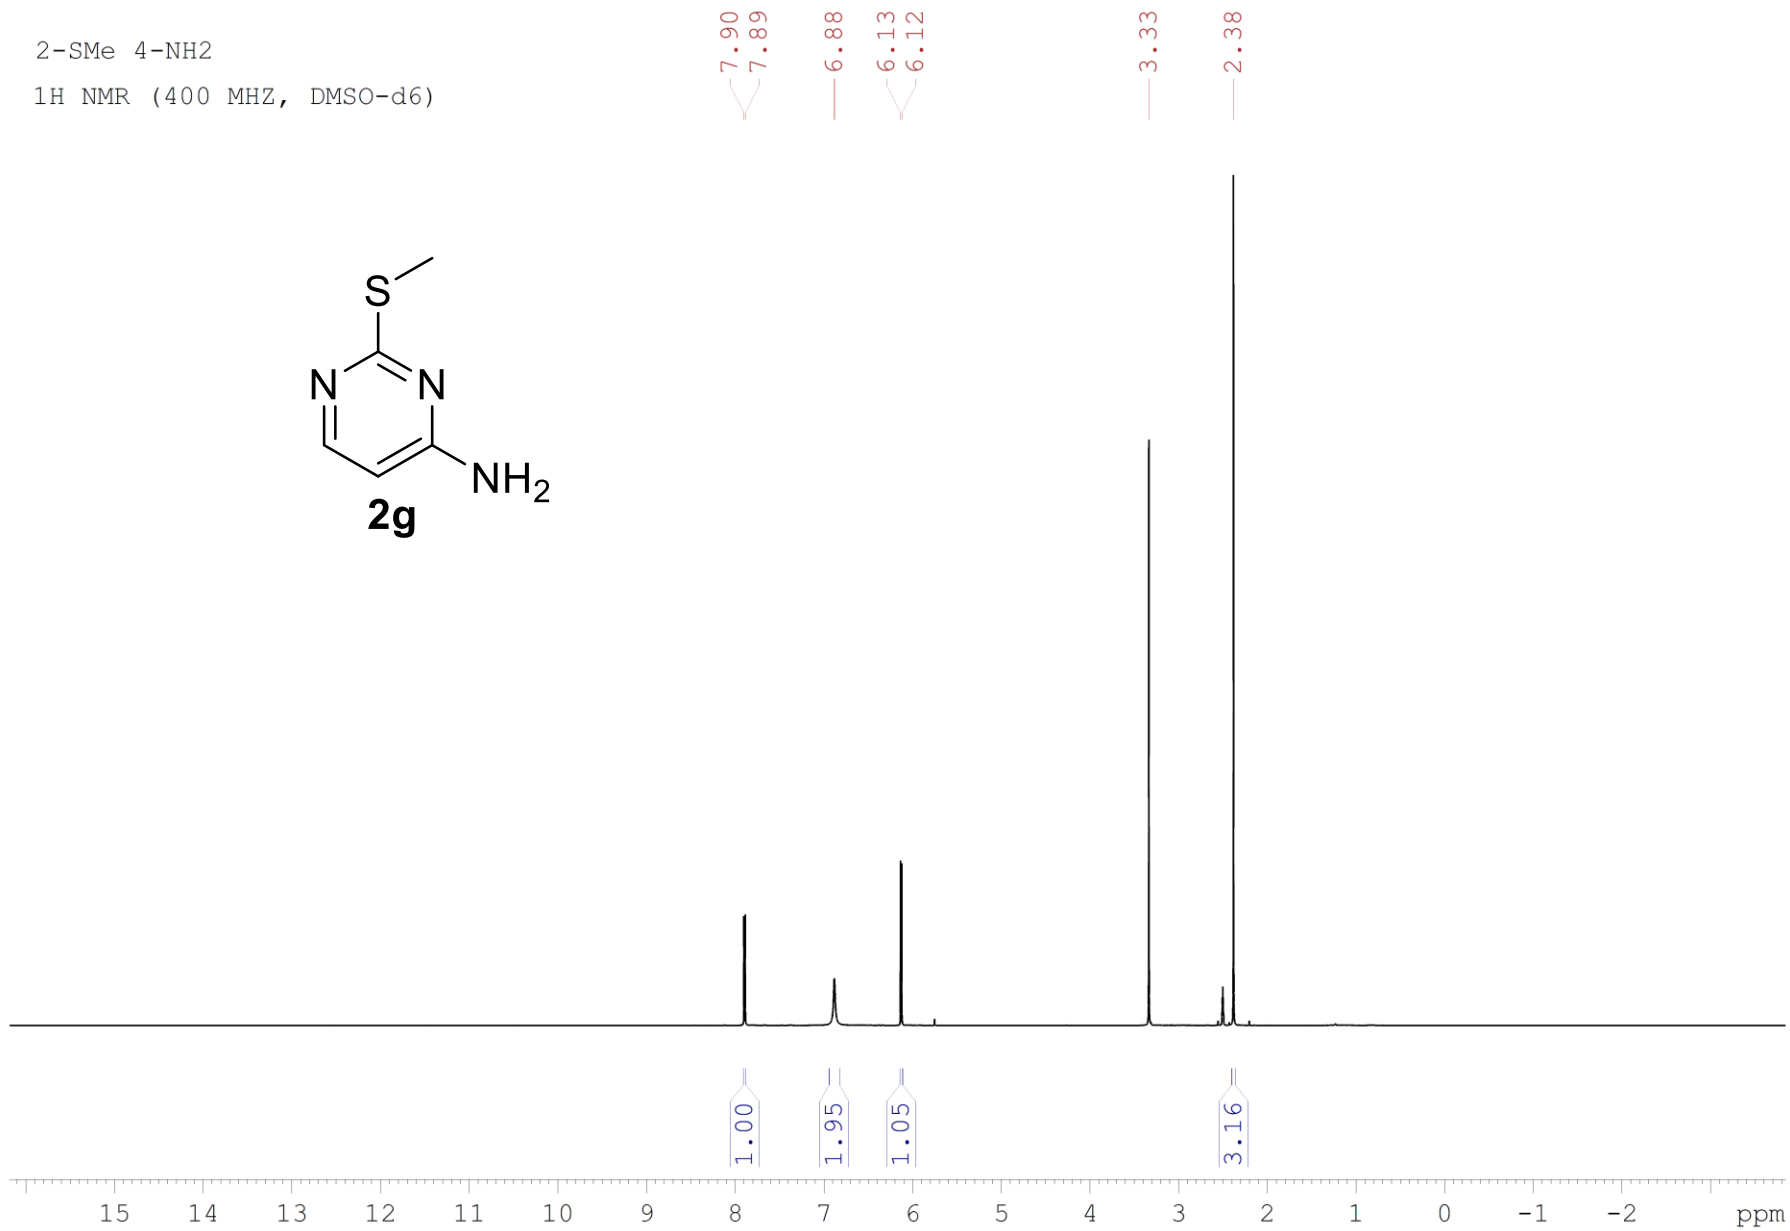

2-SMe 4-C(O)NH<sub>2</sub>

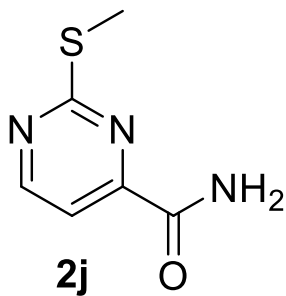

<sup>1</sup>H NMR (400 MHz, DMSO-d<sub>6</sub>)

8.84  
8.83

8.20  
7.95  
7.65  
7.64

3.34

2.60

1.00

0.81

0.88

1.04

3.22

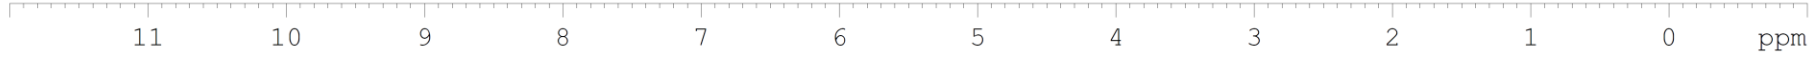

2-SMe 4-C(O)NH<sub>2</sub>

<sup>13</sup>C NMR (100 MHz, DMSO-d<sub>6</sub>)

— 171.40  
— 164.36  
— 159.78  
— 157.41

— 113.58

— 13.58

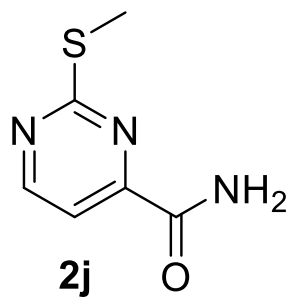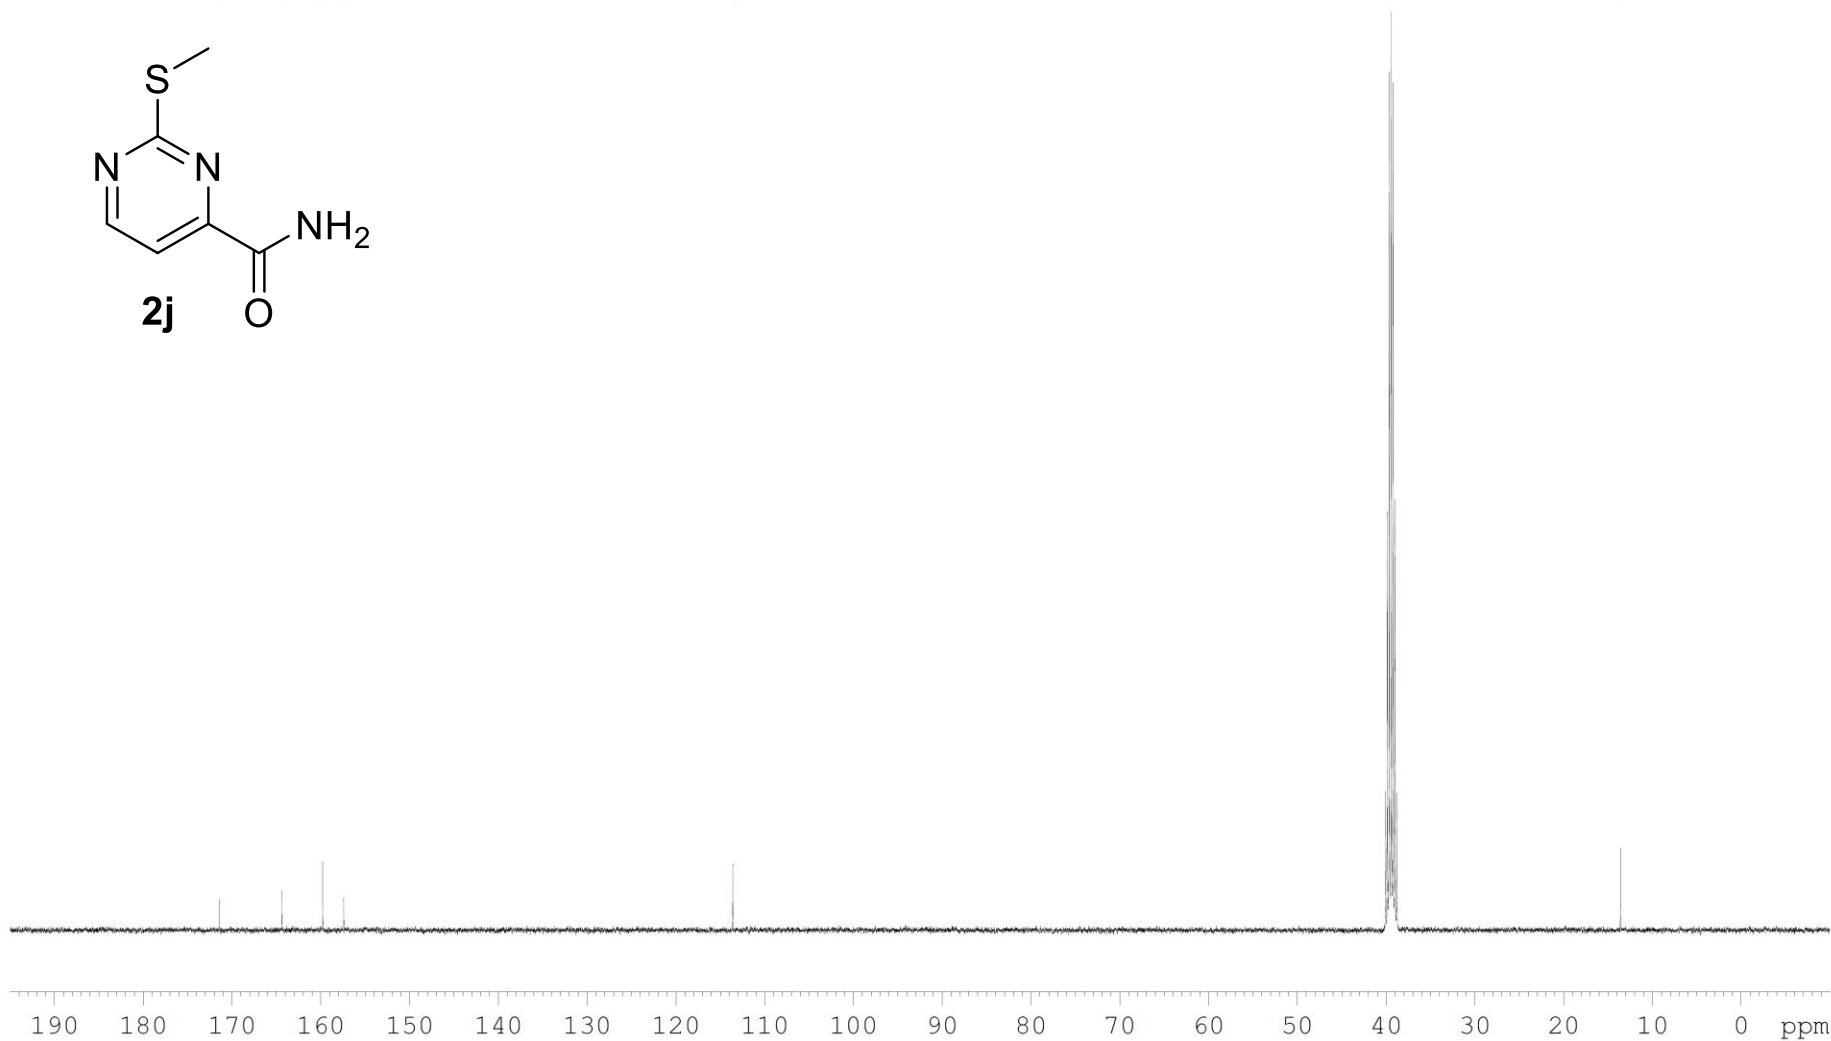

2-SMe 4-COOMe

8.91  
8.90

7.69  
7.67

<sup>1</sup>H NMR (400 MHz, DMSO-d<sub>6</sub>)

3.91

3.32

2.56

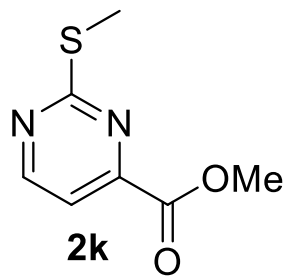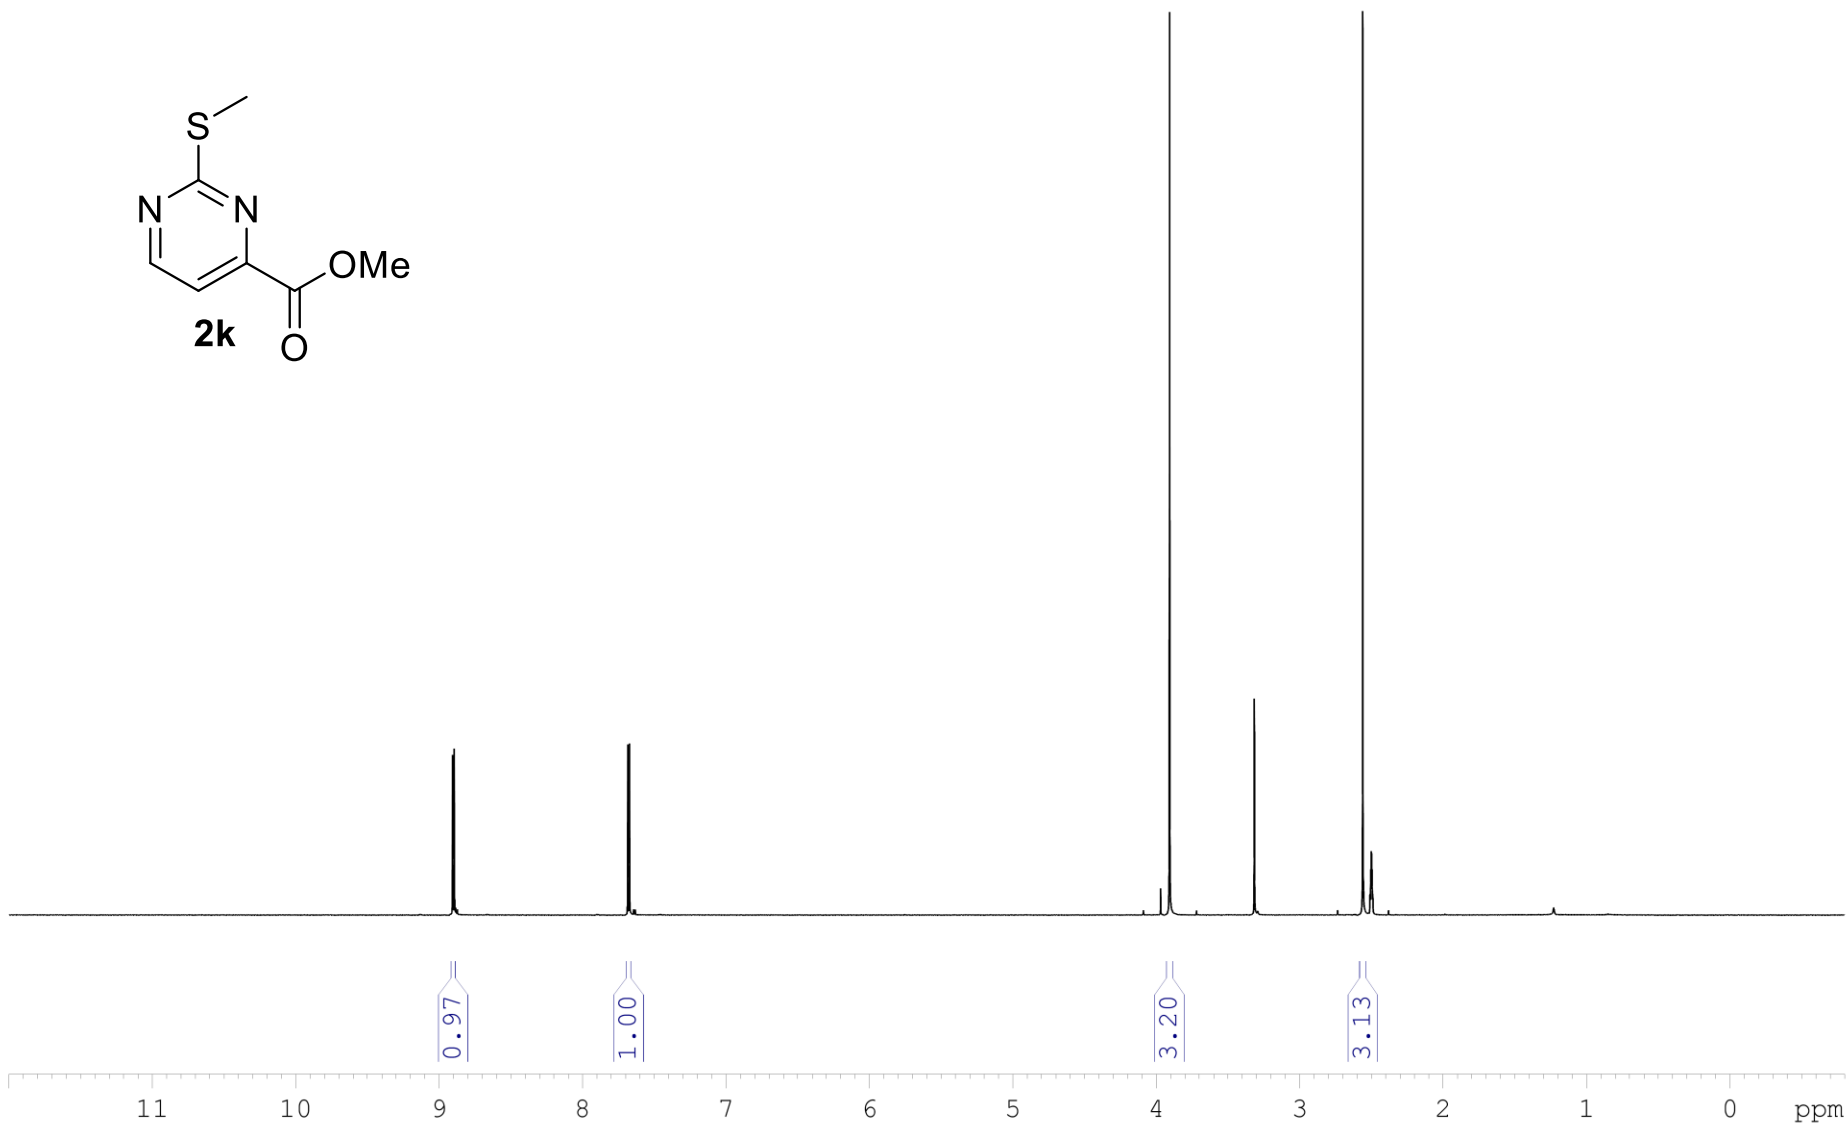



2-SMe 4-COOMe  
13C NMR (100 MHz, DMSO-d6)

— 172.37

— 163.89

— 160.15

— 154.69

— 116.02

— 53.06

— 13.61

190 180 170 160 150 140 130 120 110 100 90 80 70 60 50 40 30 20 10 0 ppm

2-SMe 4-CF<sub>3</sub>  
1H NMR (400 MHz, DMSO-d<sub>6</sub>)

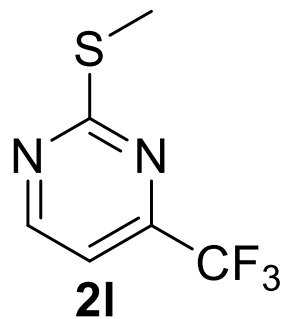

9.00  
8.99

7.70  
7.69

3.32

2.57

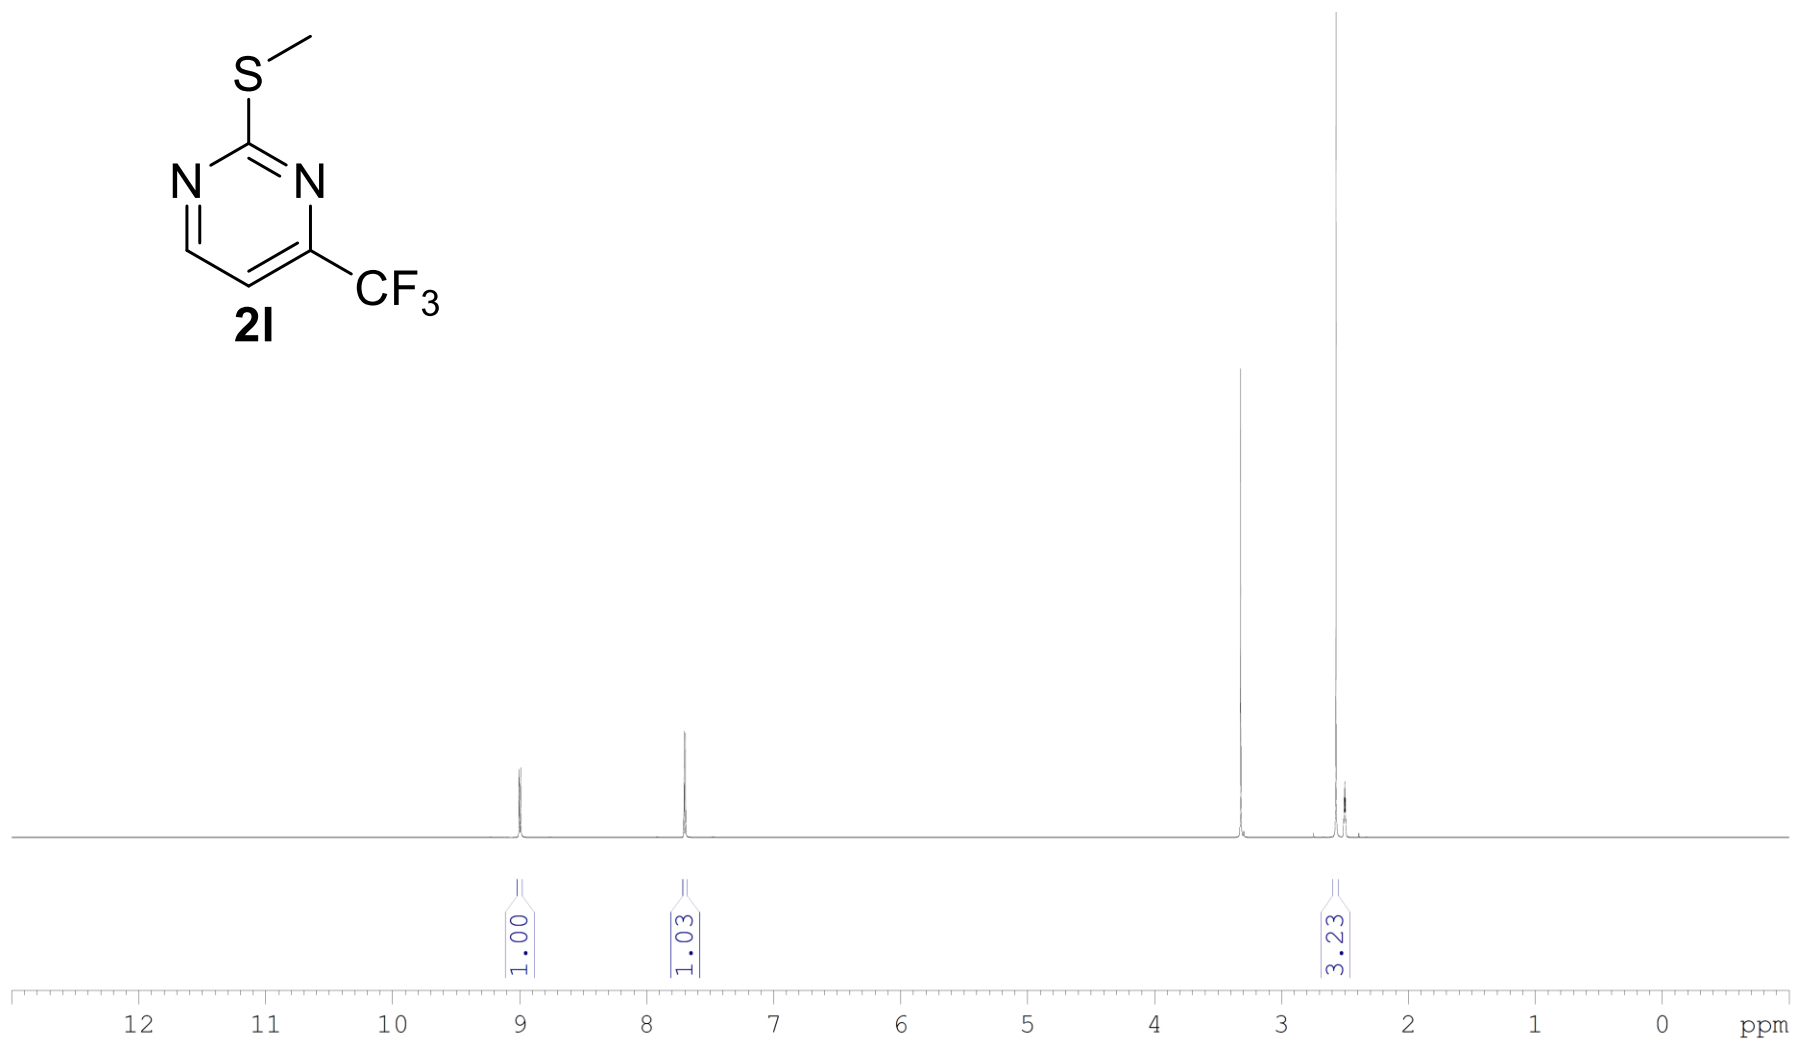

2-SMe 4-CF<sub>3</sub>

<sup>19</sup>F NMR (376 MHz, DMSO-d<sub>6</sub>)



---68.811

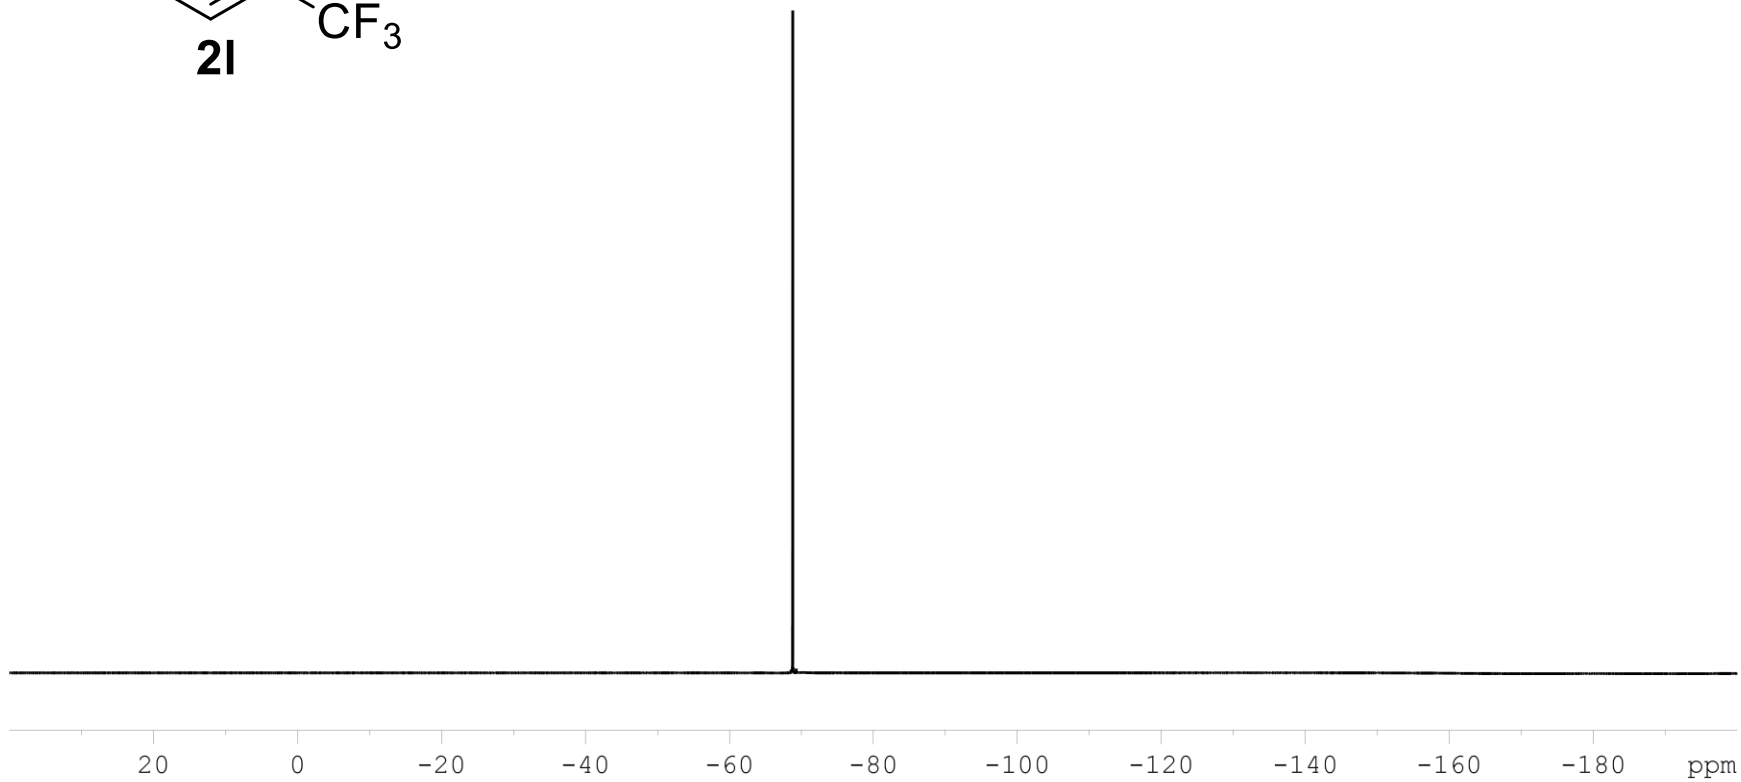

2-SMe 5-NH2  
1H NMR (400 MHz, DMSO-d6)

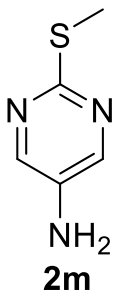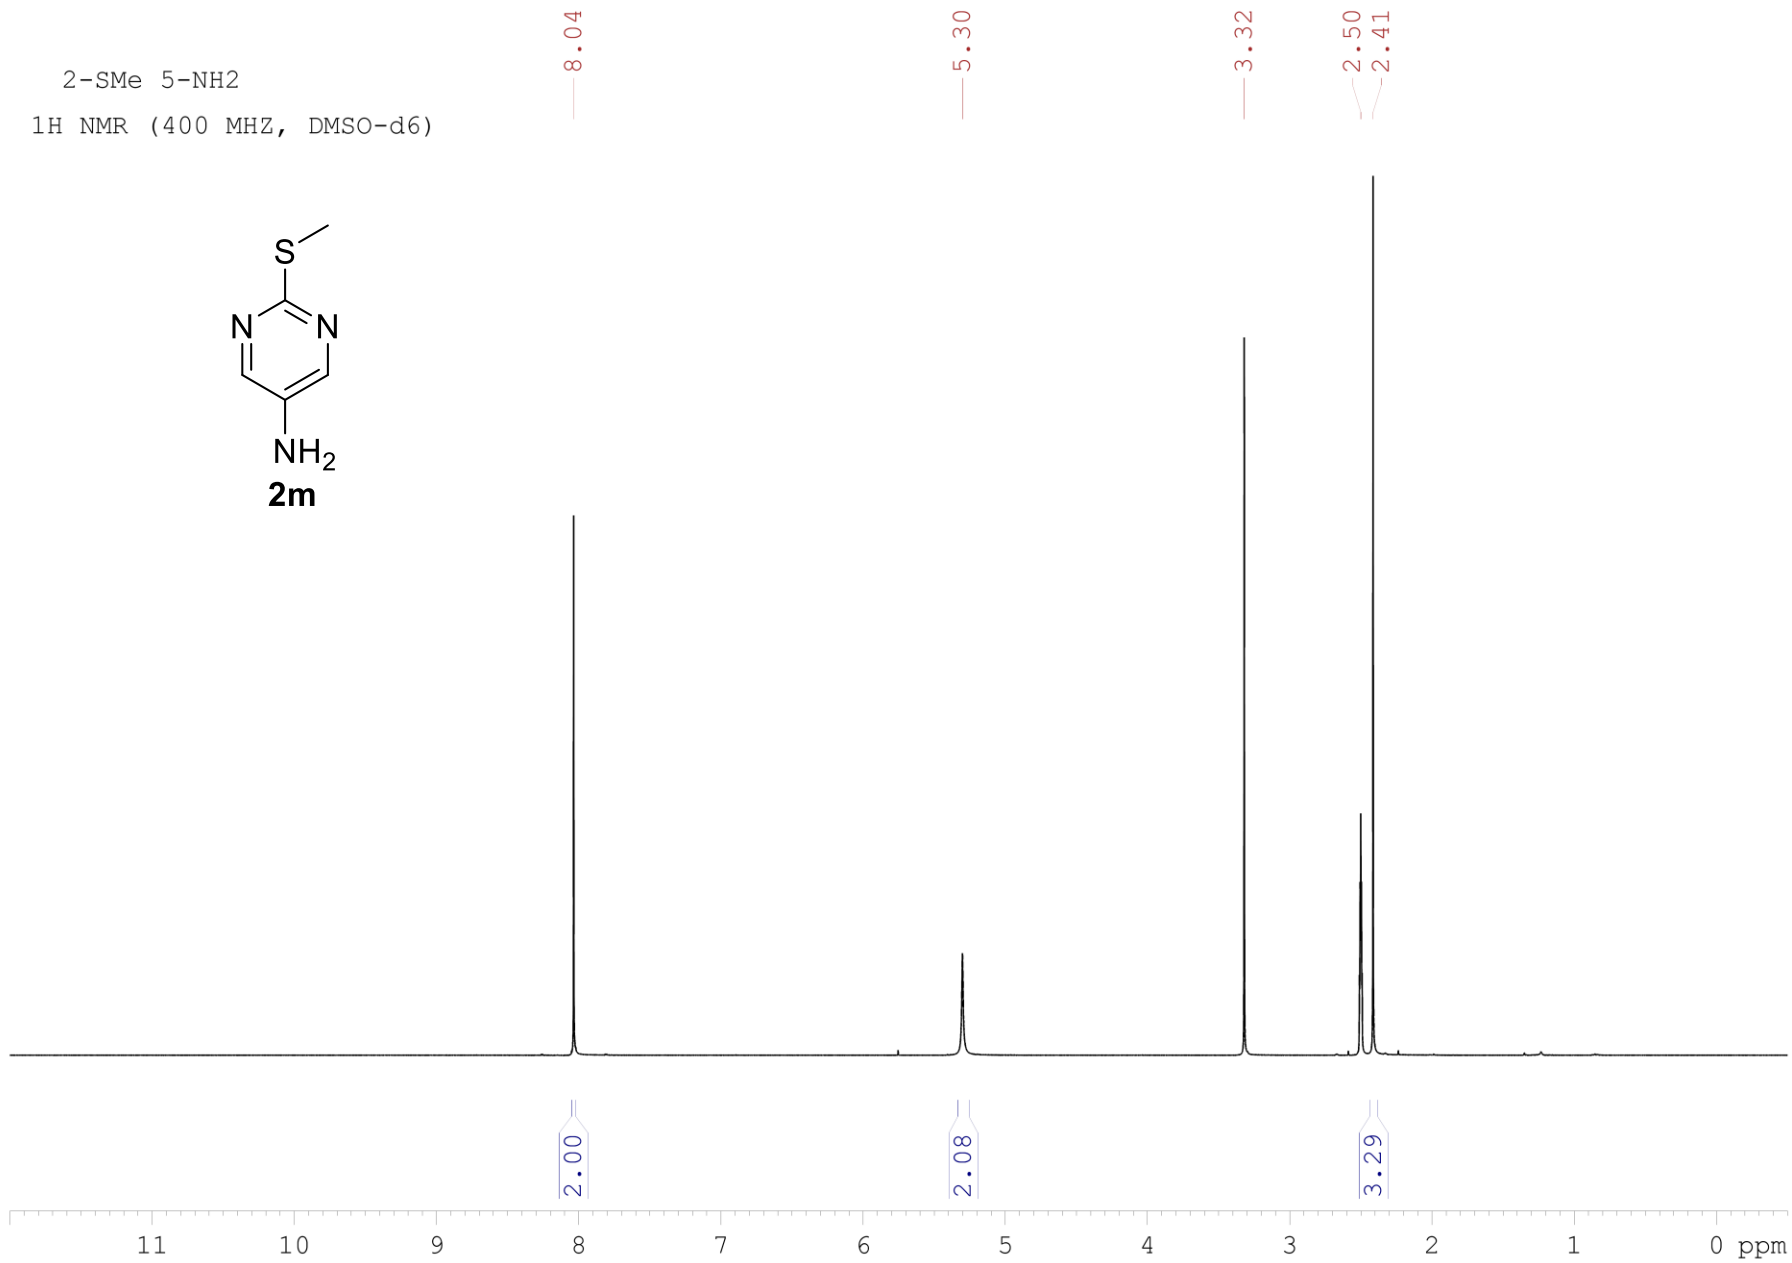



2-SMe 5-NH2

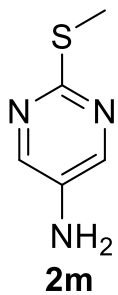

<sup>13</sup>C NMR (100 MHz, DMSO-d<sub>6</sub>)

— 156.27

— 143.13

— 139.54

— 39.52

— 13.63

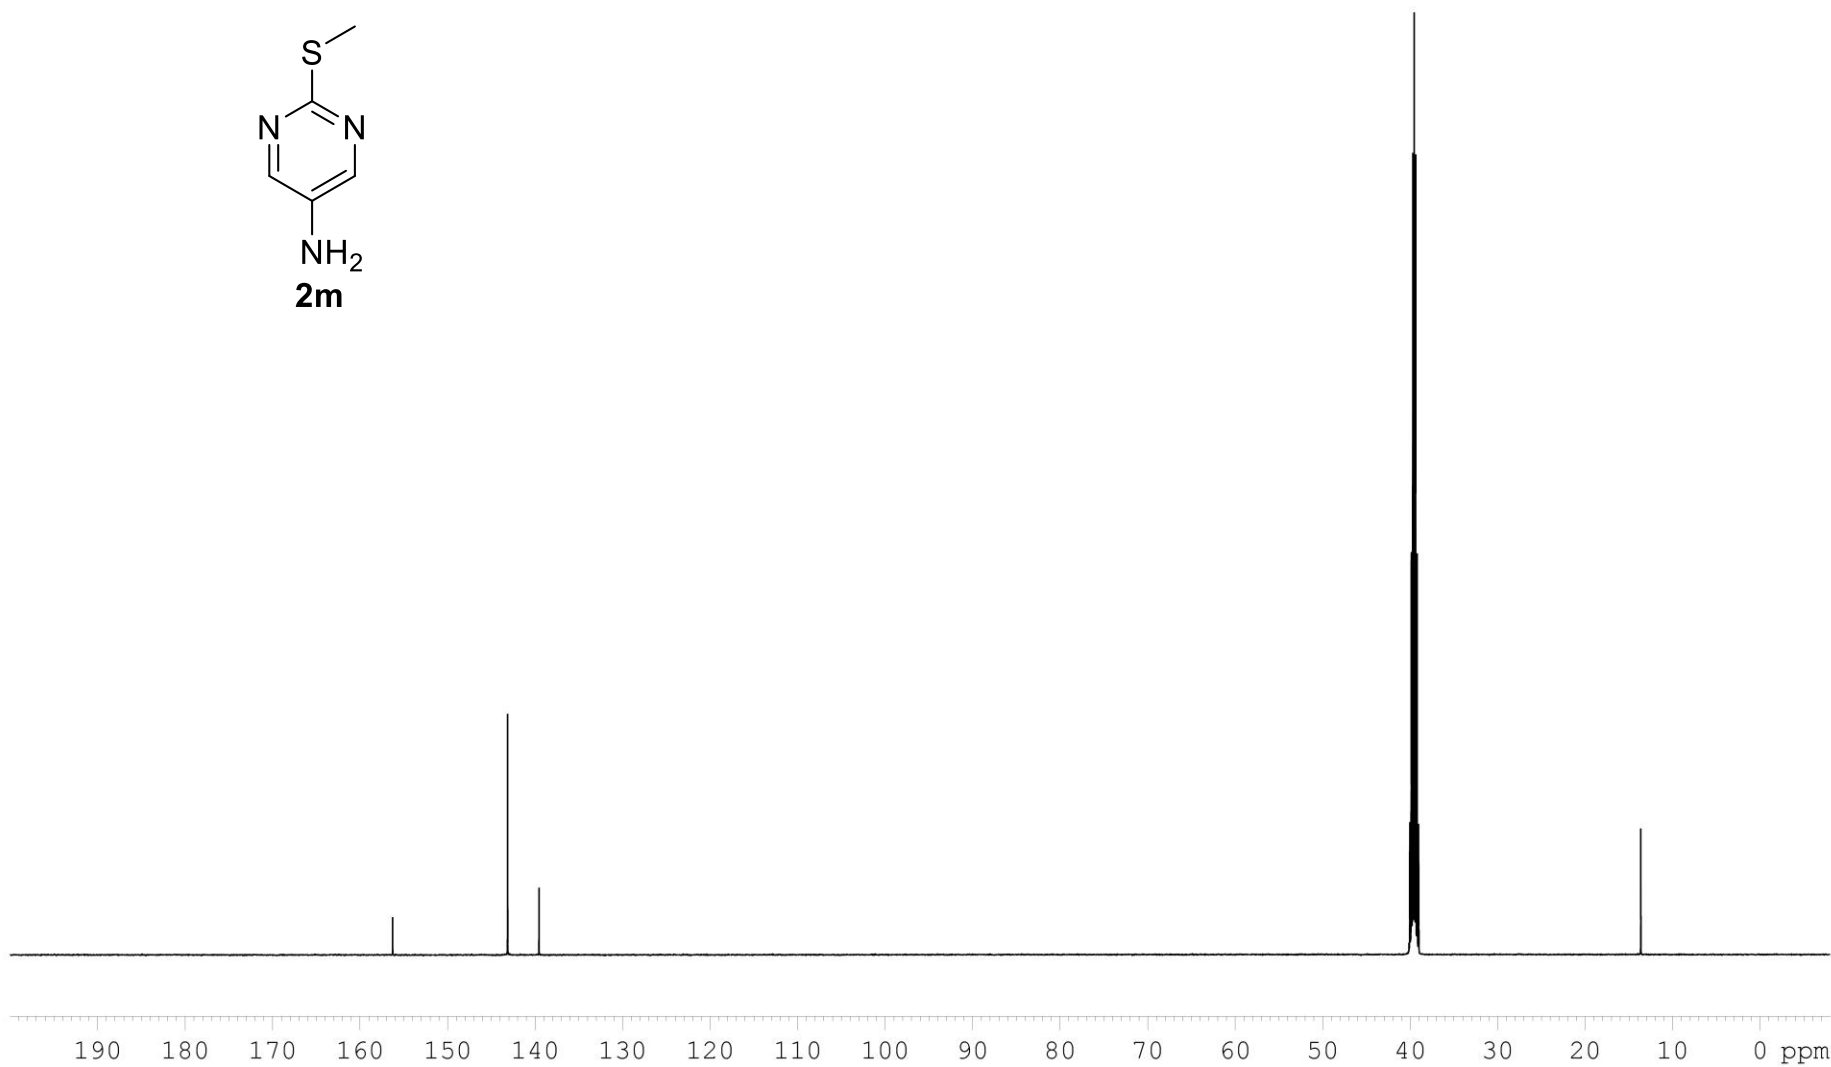

190 180 170 160 150 140 130 120 110 100 90 80 70 60 50 40 30 20 10 0 ppm

2-SMe 5-OMe  
1H NMR (400 MHz, DMSO-d6)

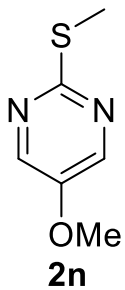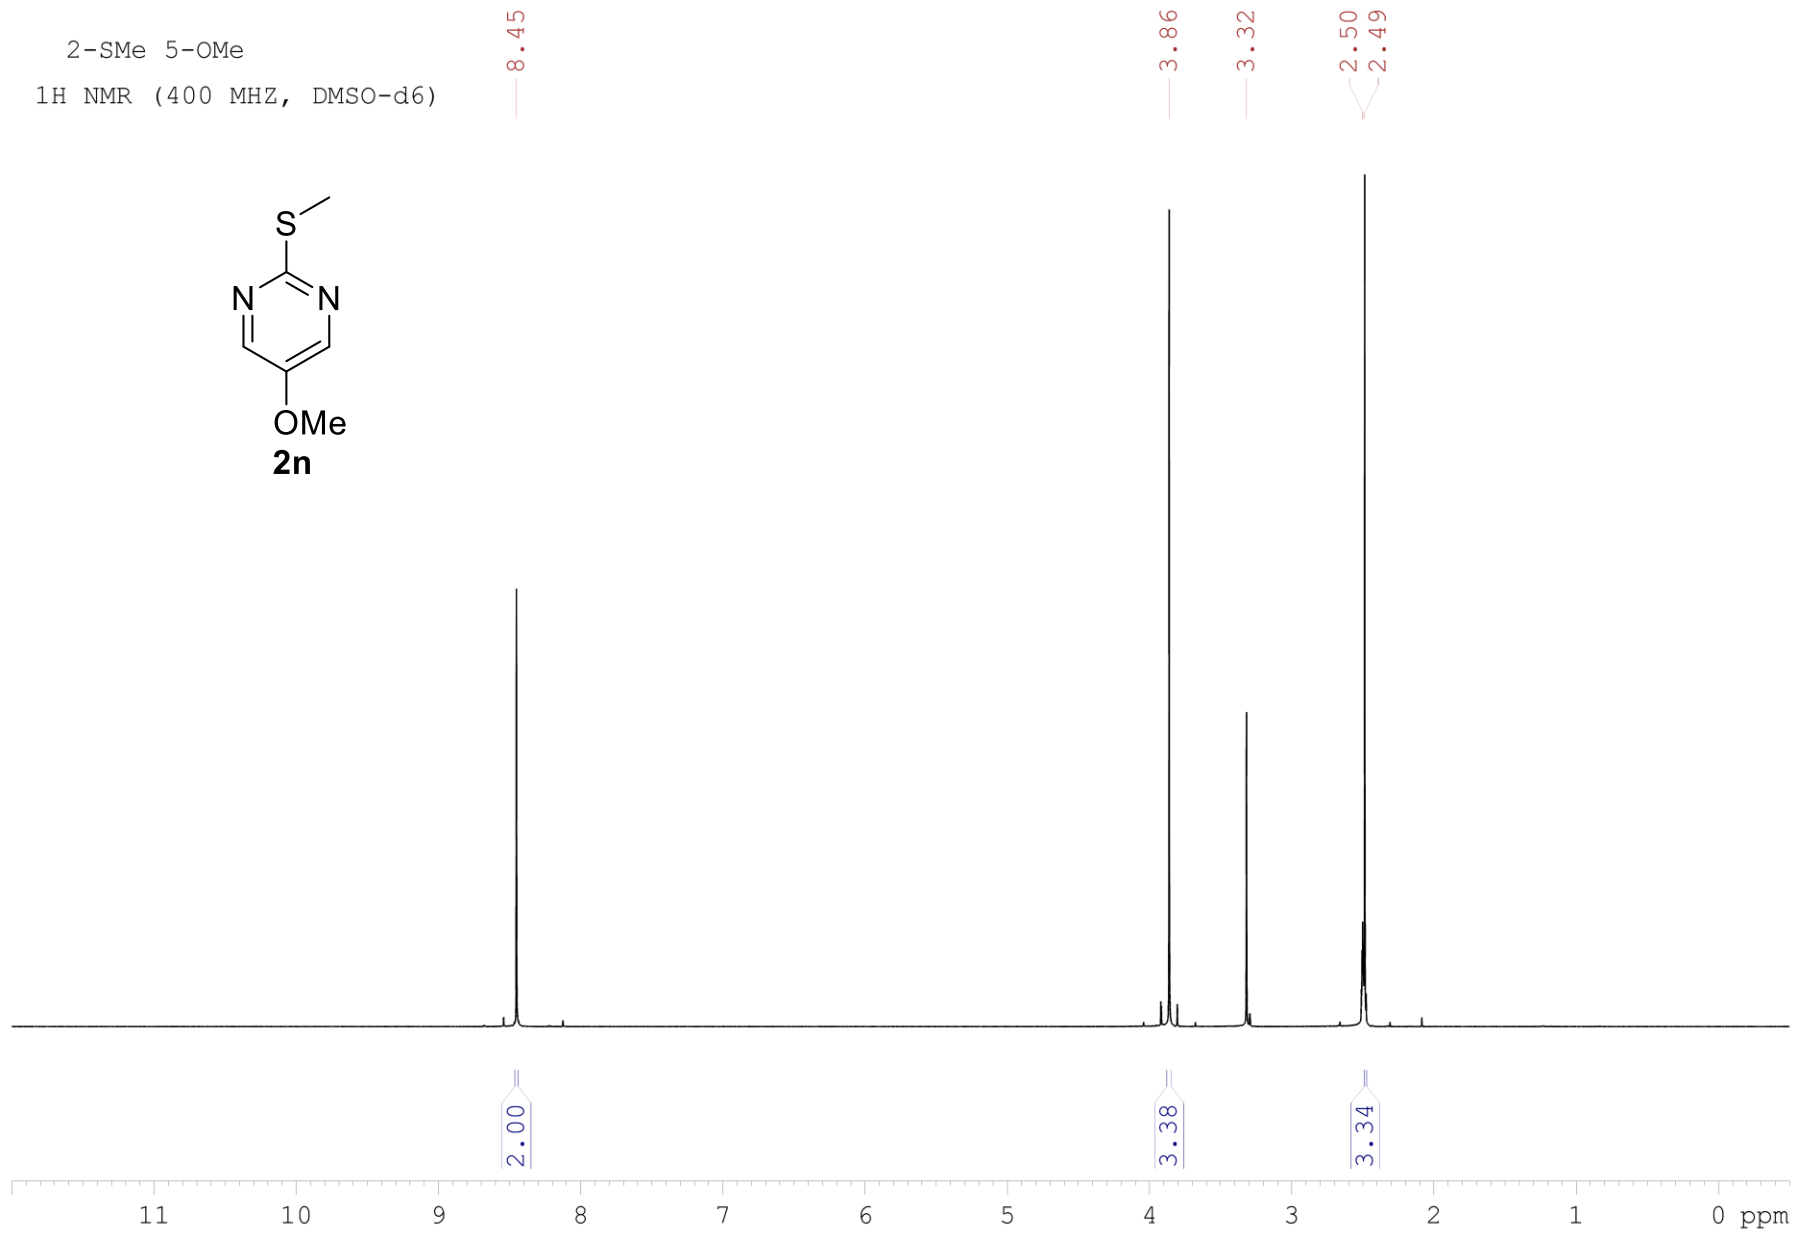

2-SMe 5-Me

<sup>1</sup>H NMR (400 MHz, DMSO-d<sub>6</sub>)

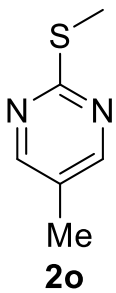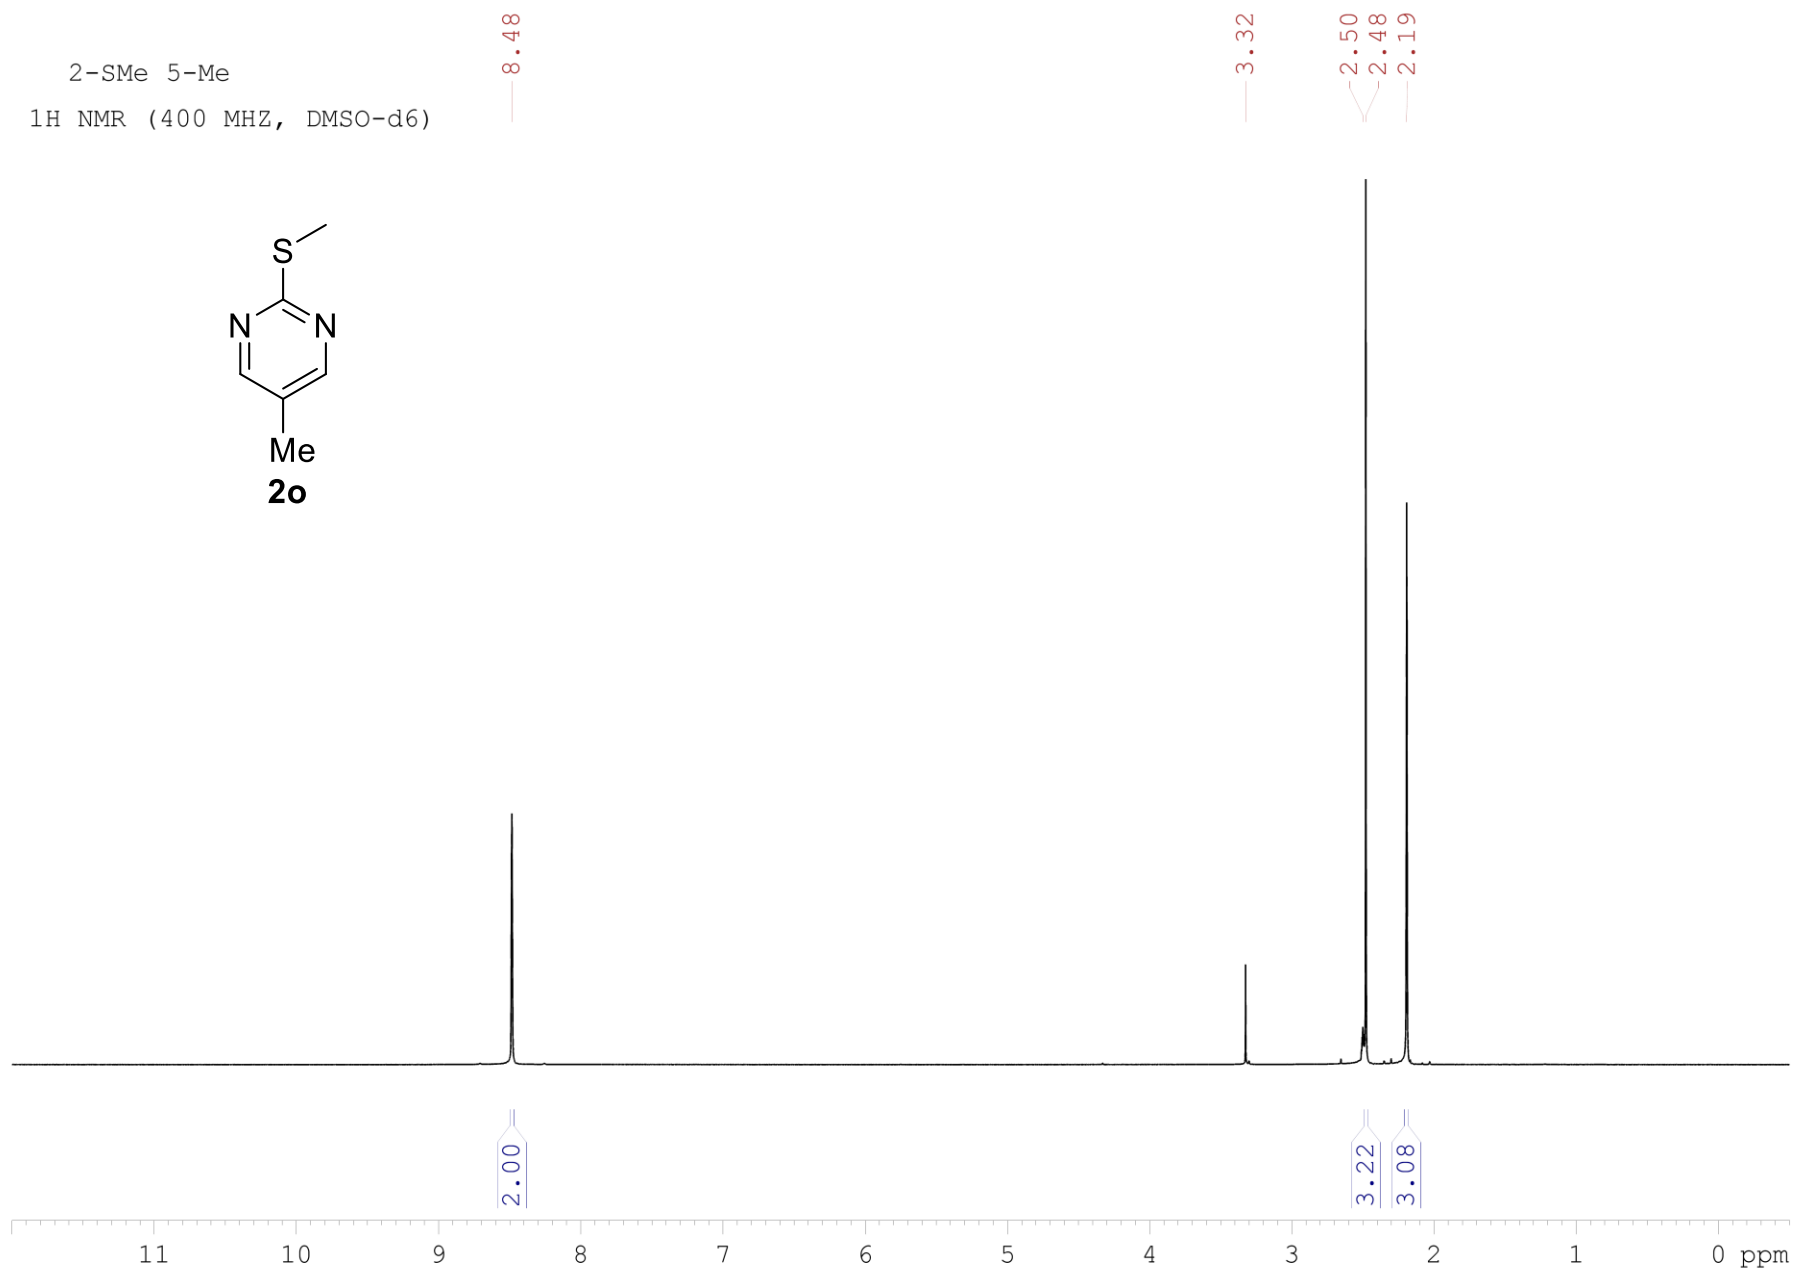

2-SMe 5-Me

— 168.21

— 157.59

— 125.93

$^{13}\text{C}$  NMR (100 MHz, DMSO-d<sub>6</sub>)

— 14.43  
— 13.49

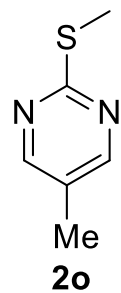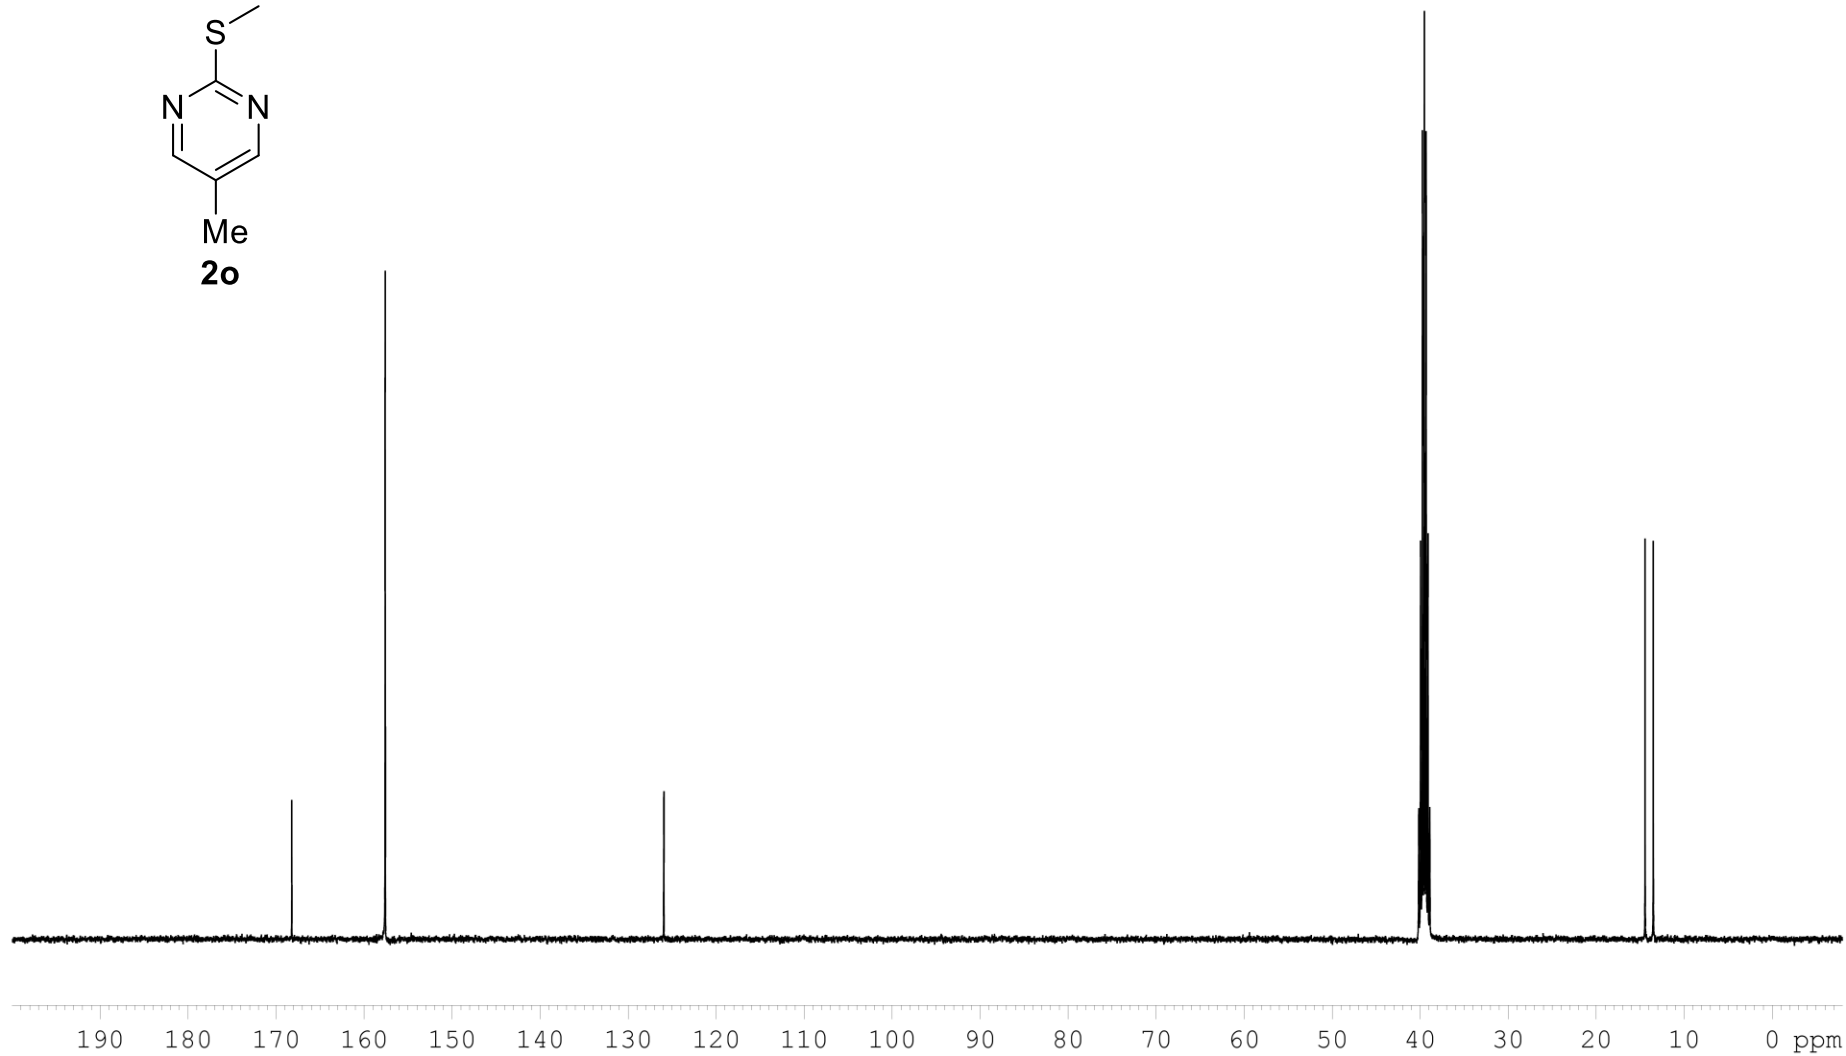

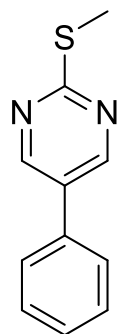

**2p**

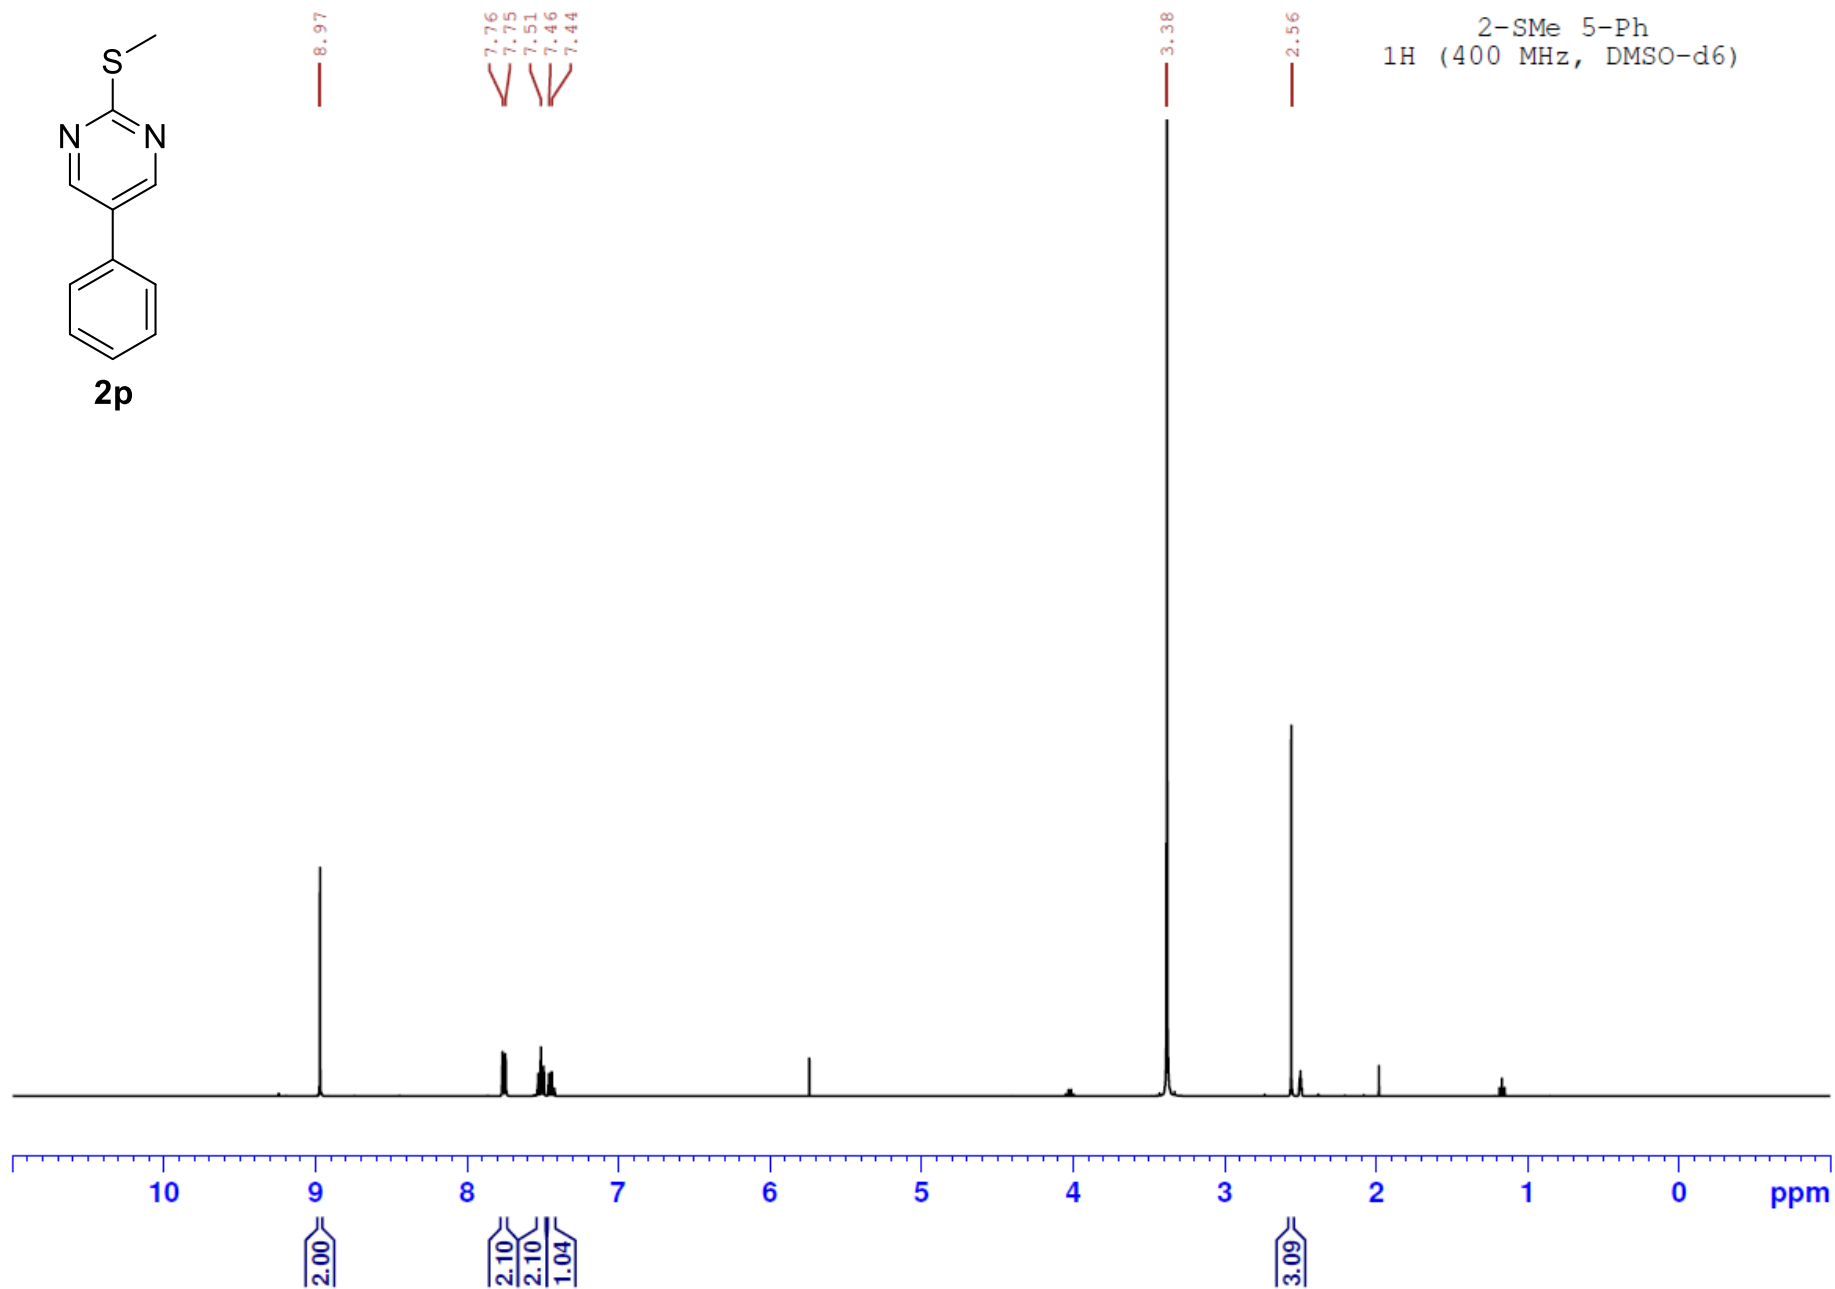



2p

170.24

155.31

133.72

129.29

128.62

128.55

126.53

2-SMe 5-Ph  
13C (100 MHz, DMSO-d6)

13.69

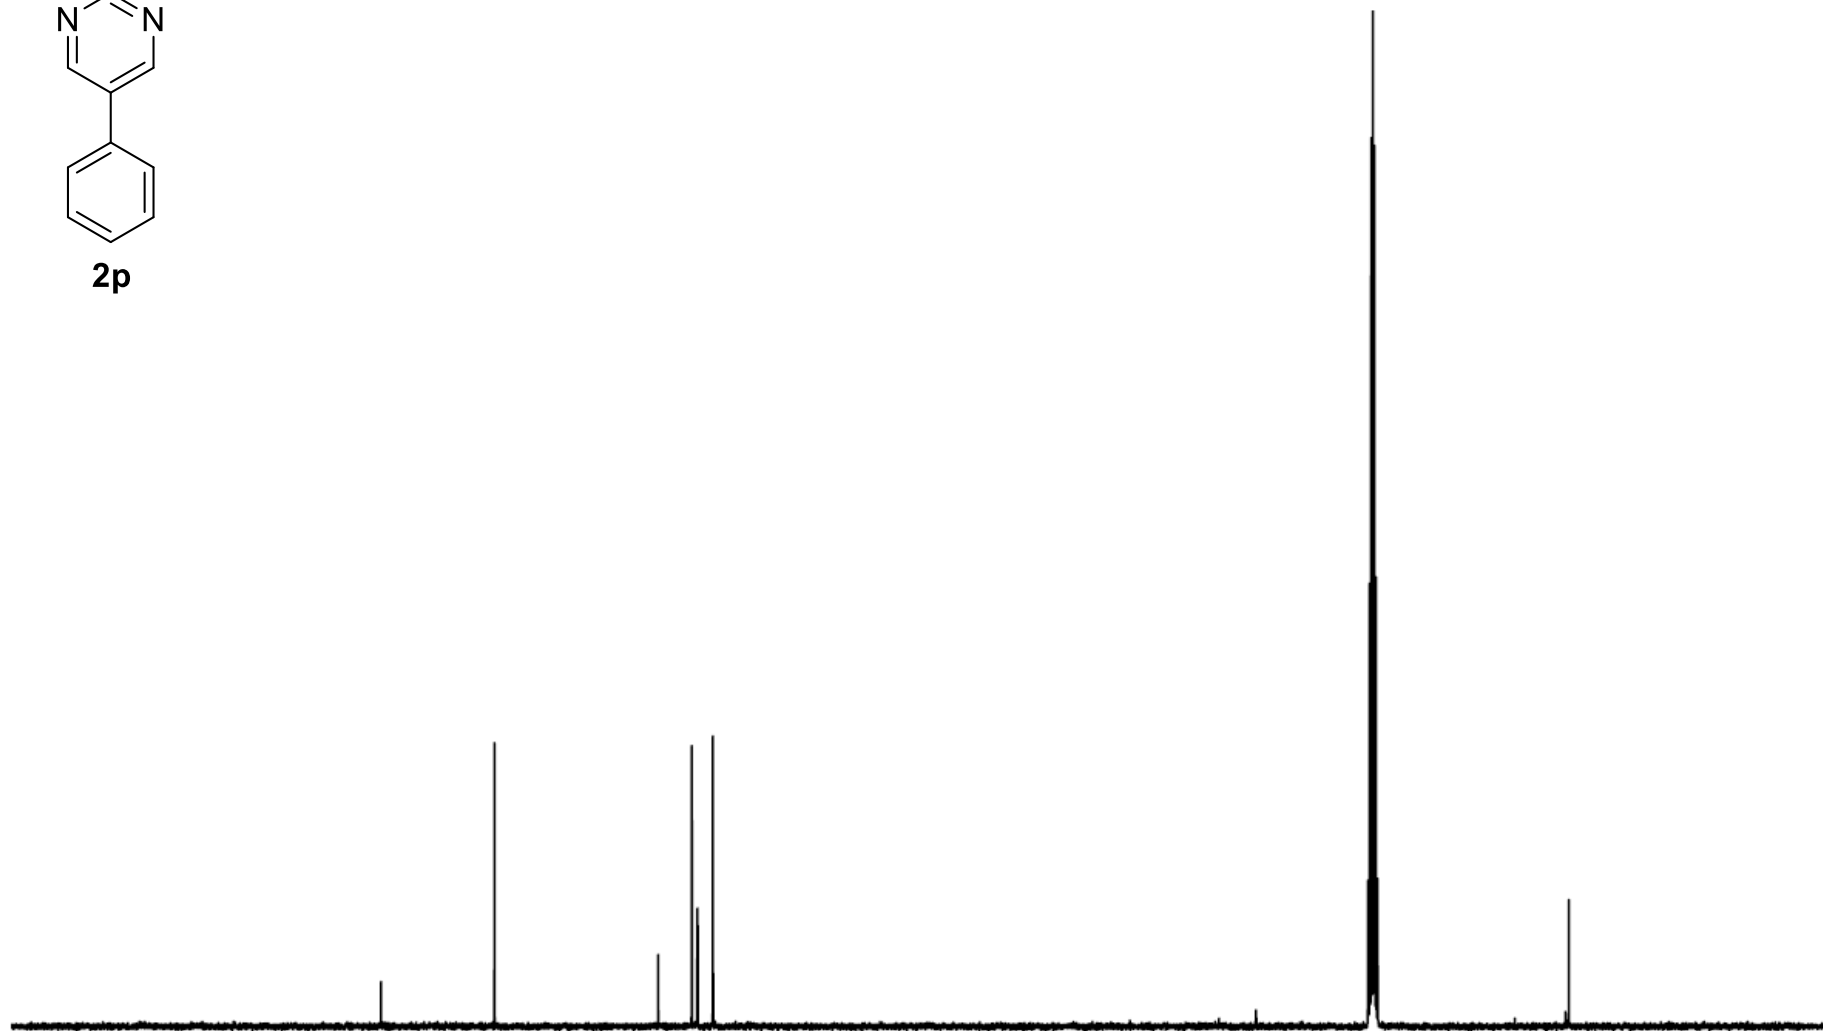

210 200 190 180 170 160 150 140 130 120 110 100 90 80 70 60 50 40 30 20 10 0 ppm

2-SMe pyrimidine ref  
1H NMR (400 MHz, DMSO-d6)

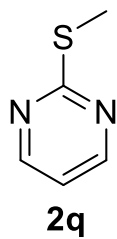

8.64  
8.63  
7.22  
7.21  
7.20  
2.51

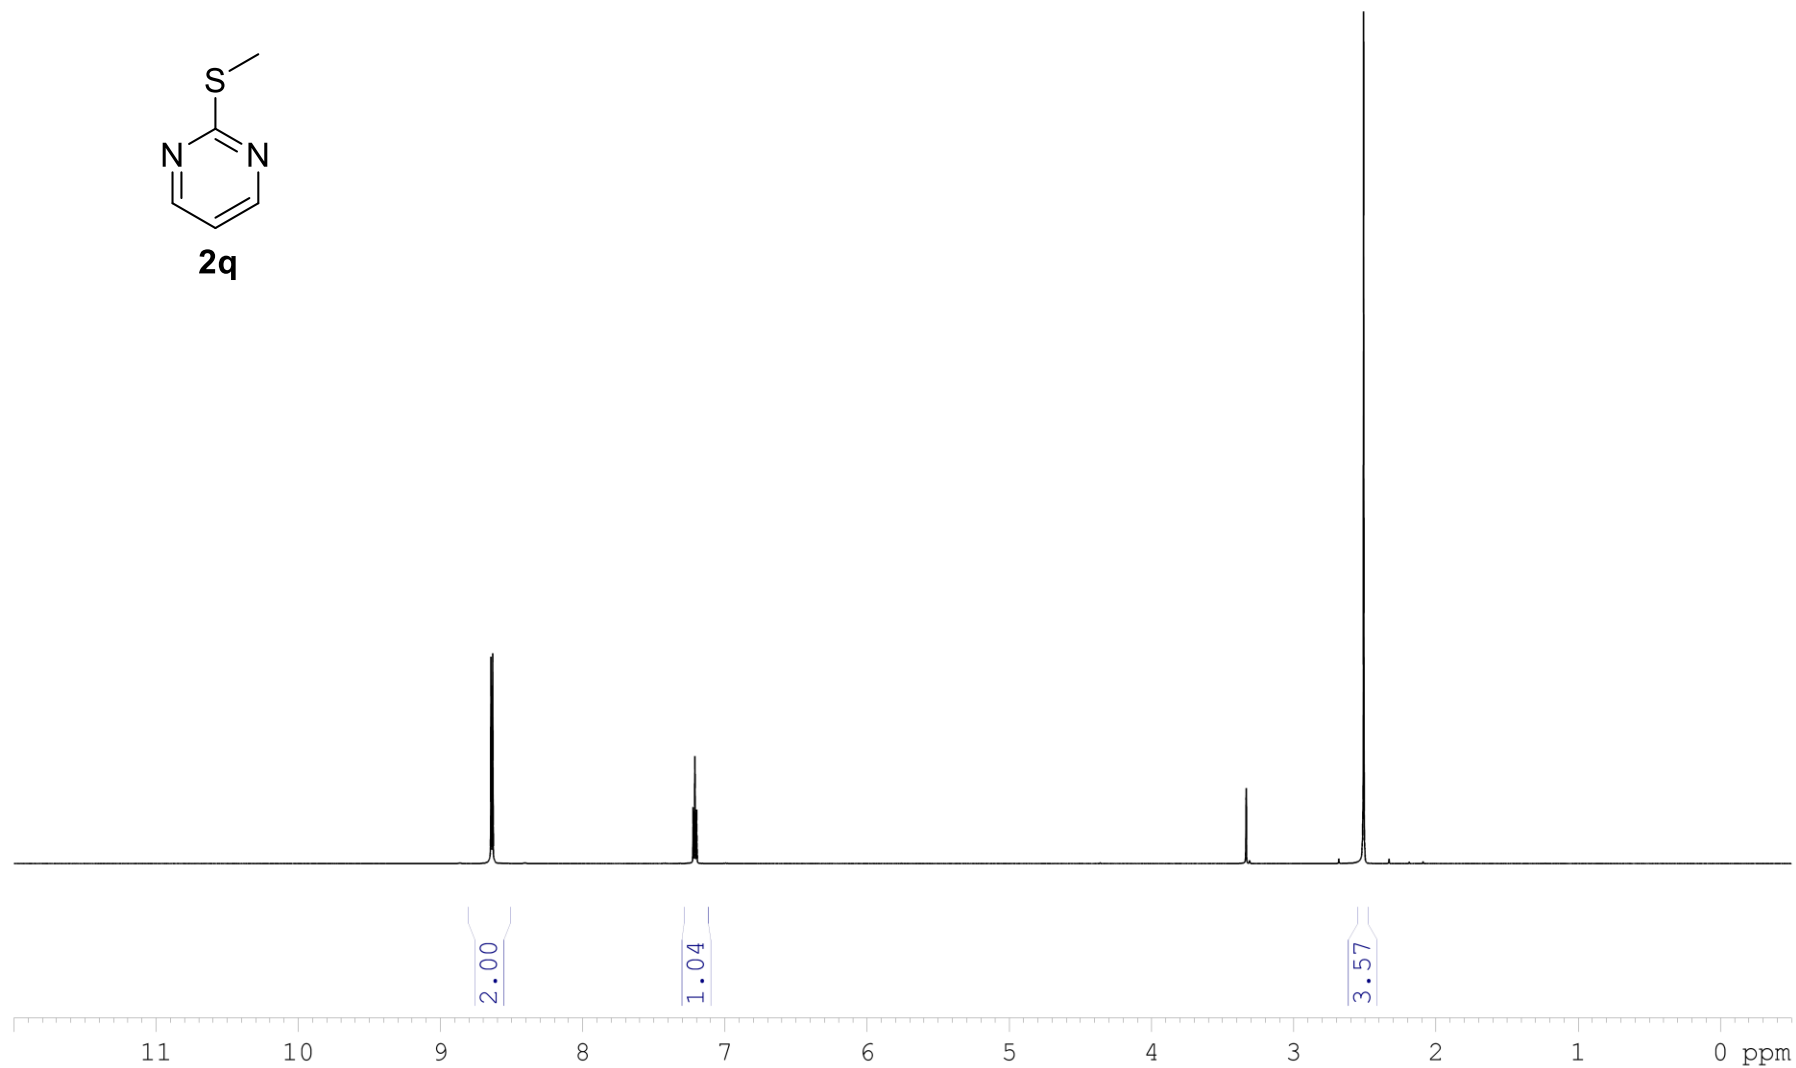

2-SMe 5-F

<sup>1</sup>H NMR (400 MHz, DMSO-d<sub>6</sub>)

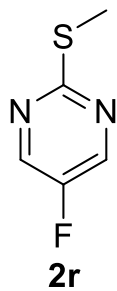

8.78  
8.77

3.32

2.52  
2.50

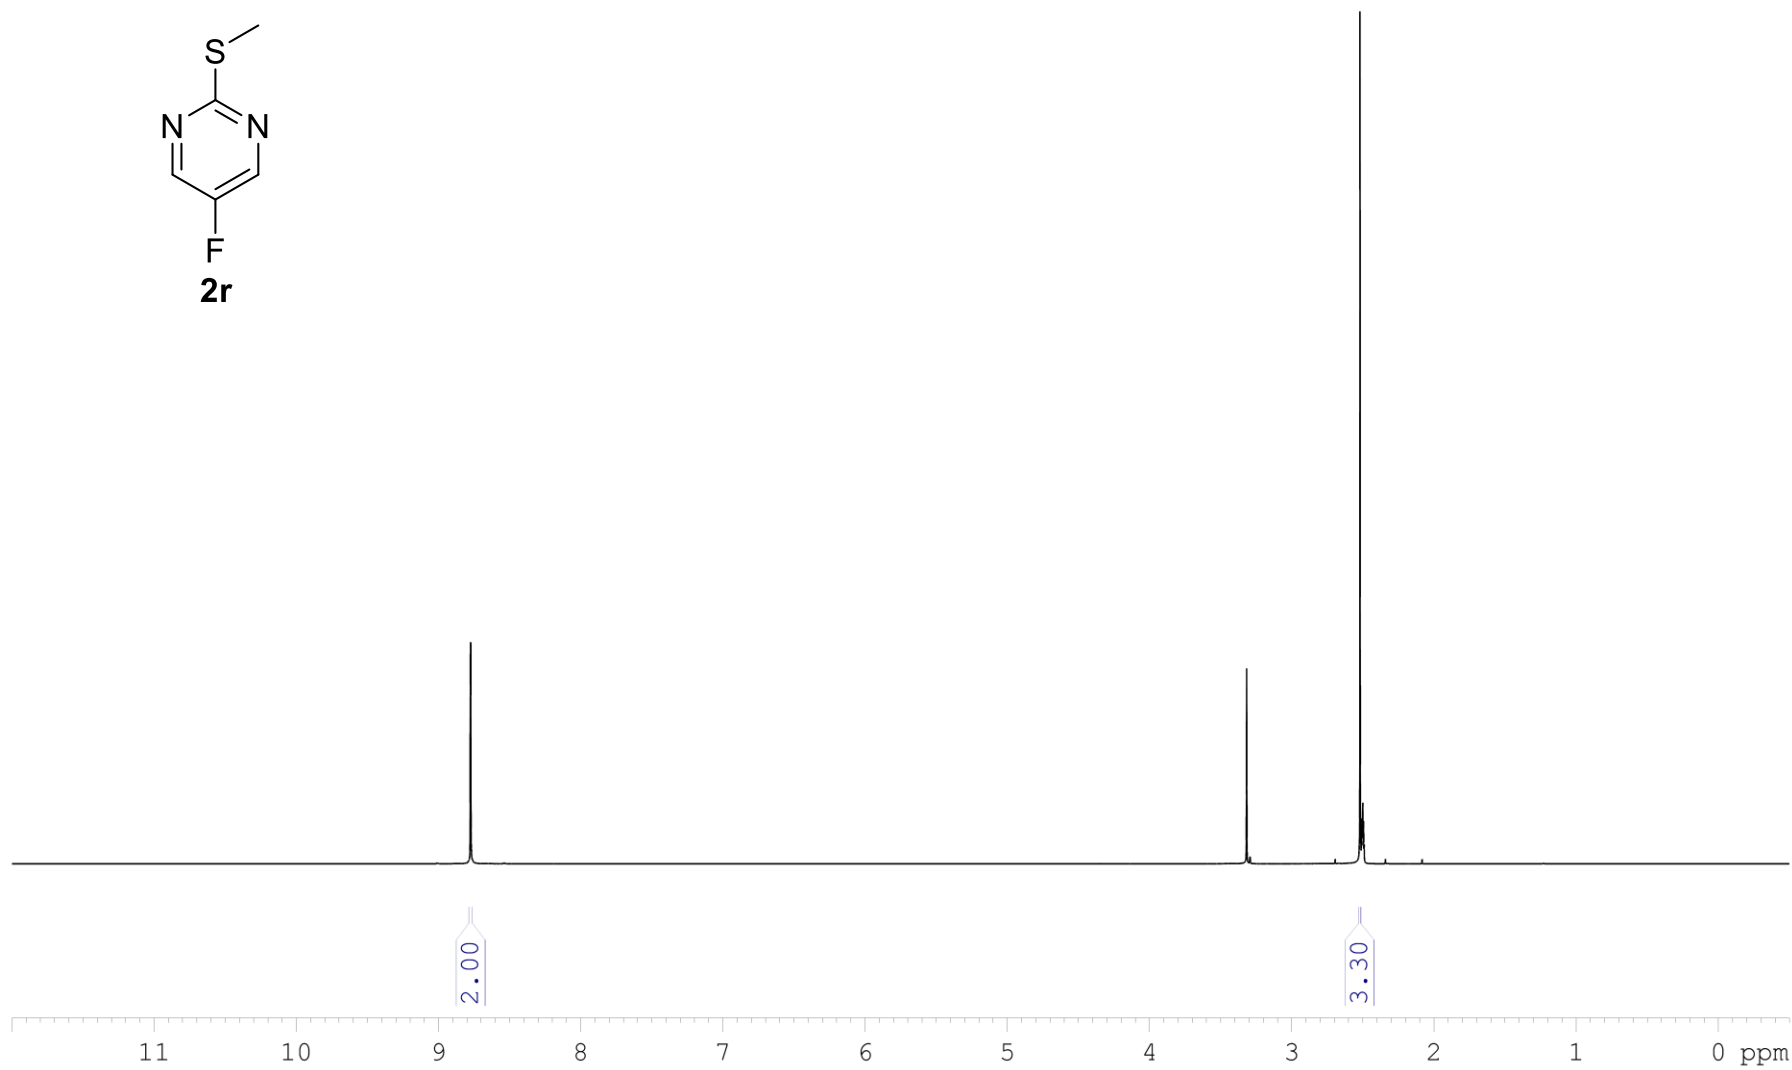



<sup>13</sup>C NMR (100 MHz, DMSO-d<sub>6</sub>)

2-SMe 5-F

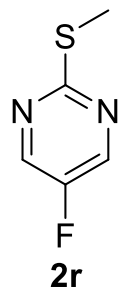

166.73  
166.69

156.78  
154.22

146.01  
145.80

14.18

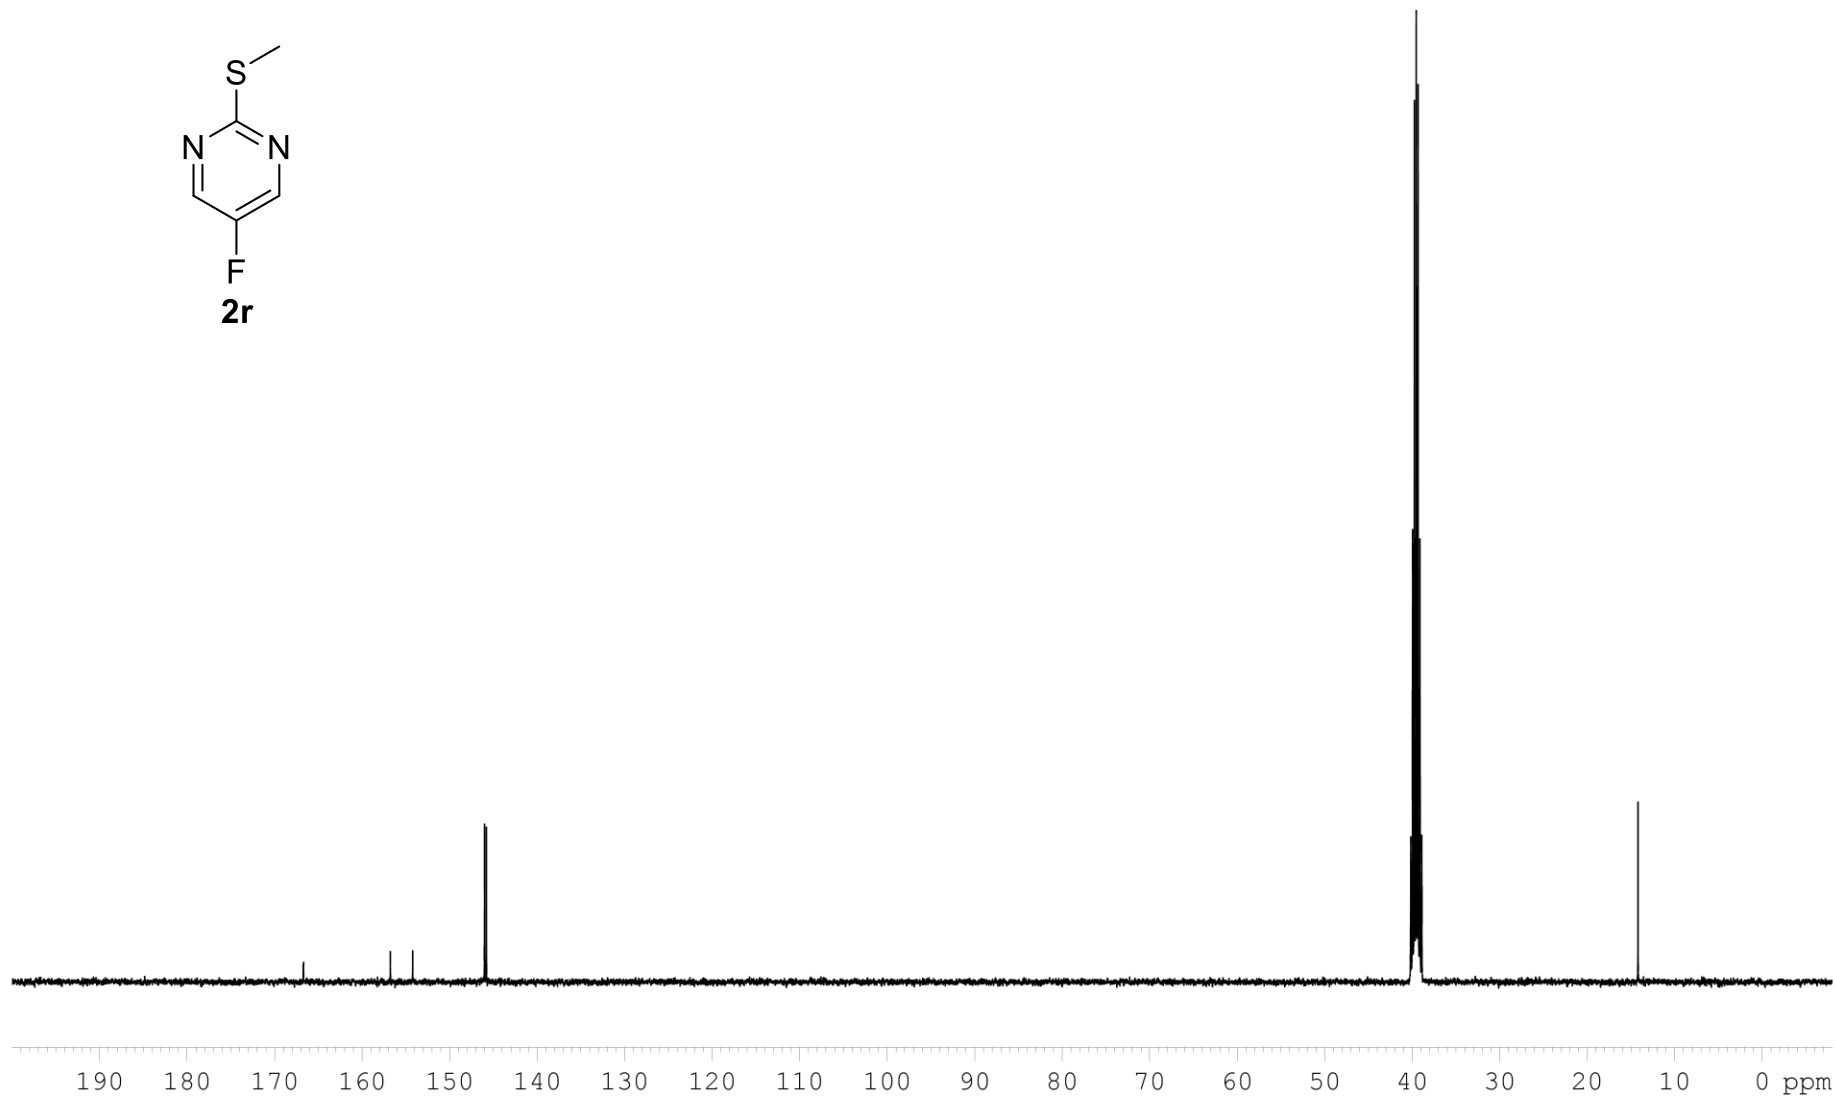

2-SMe 5-Cl

<sup>1</sup>H NMR (400 MHz, DMSO-d<sub>6</sub>)

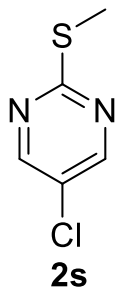

8.77

3.31

2.52  
2.50

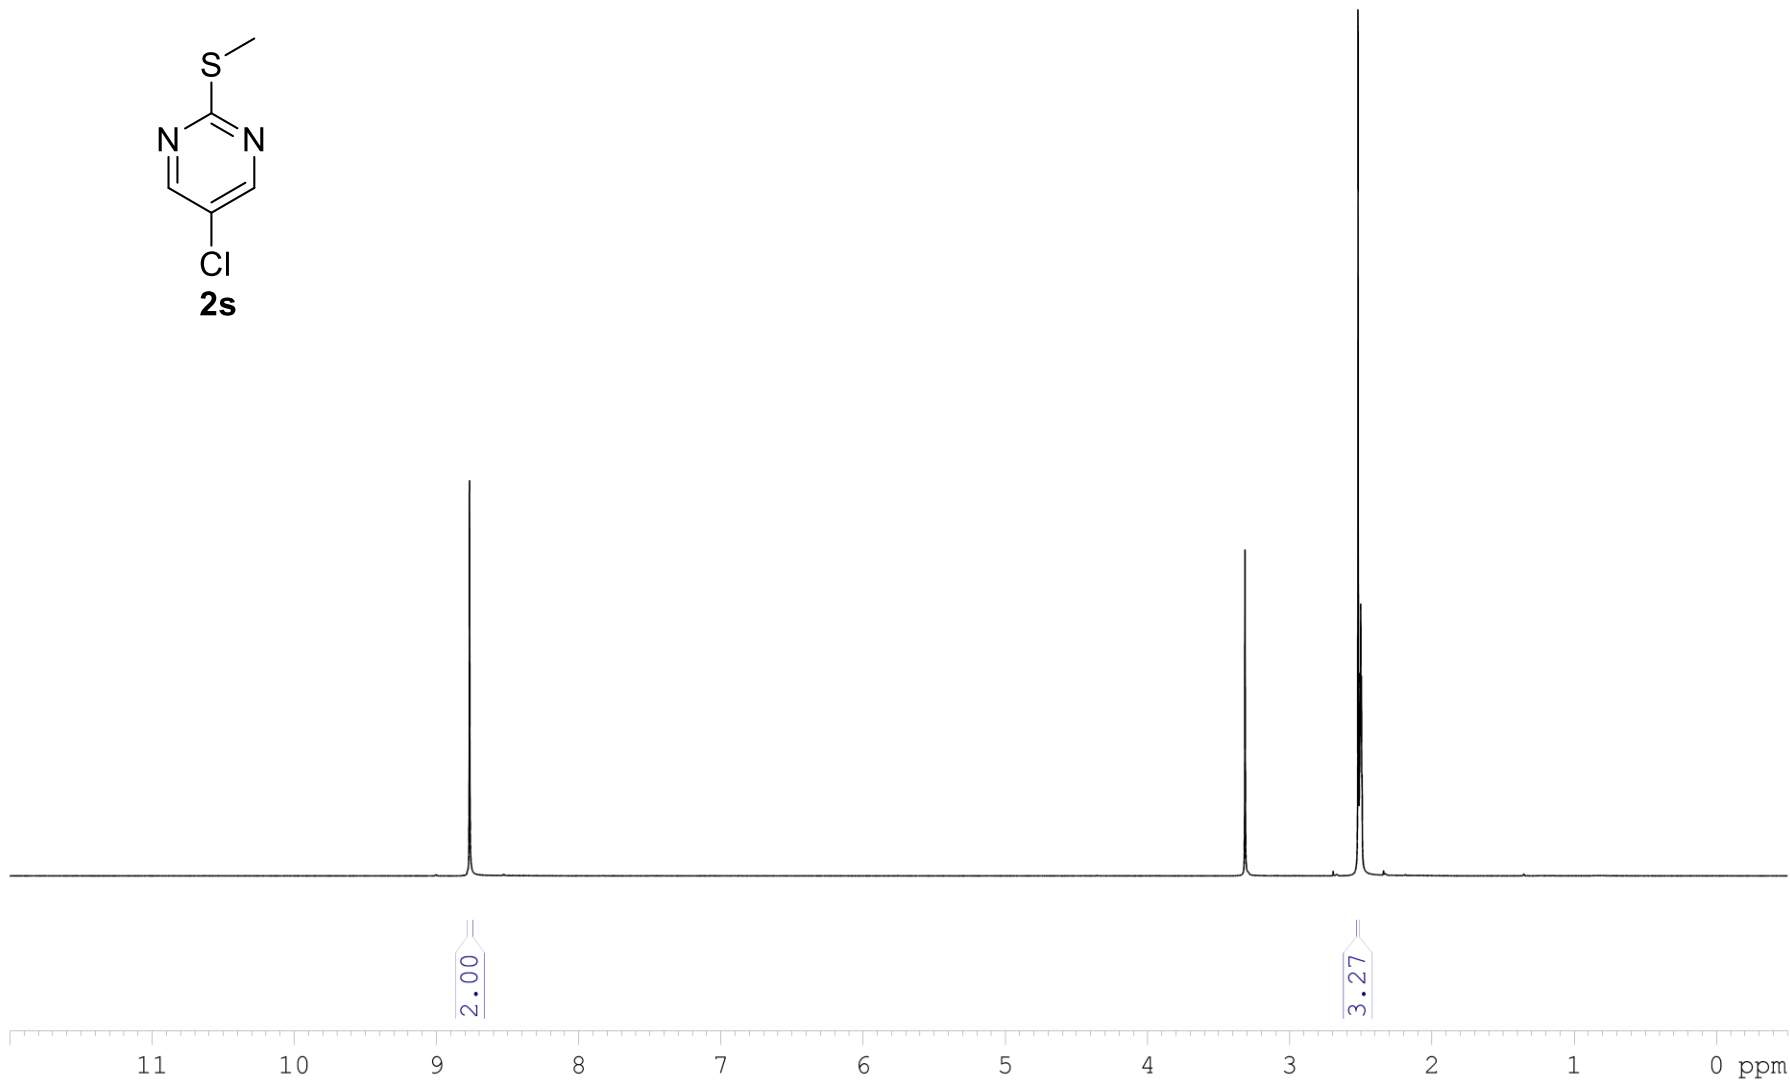

2-SMe 5-Br

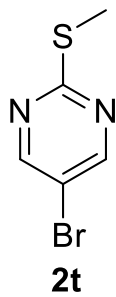

1H NMR (400 MHz, DMSO-d6)

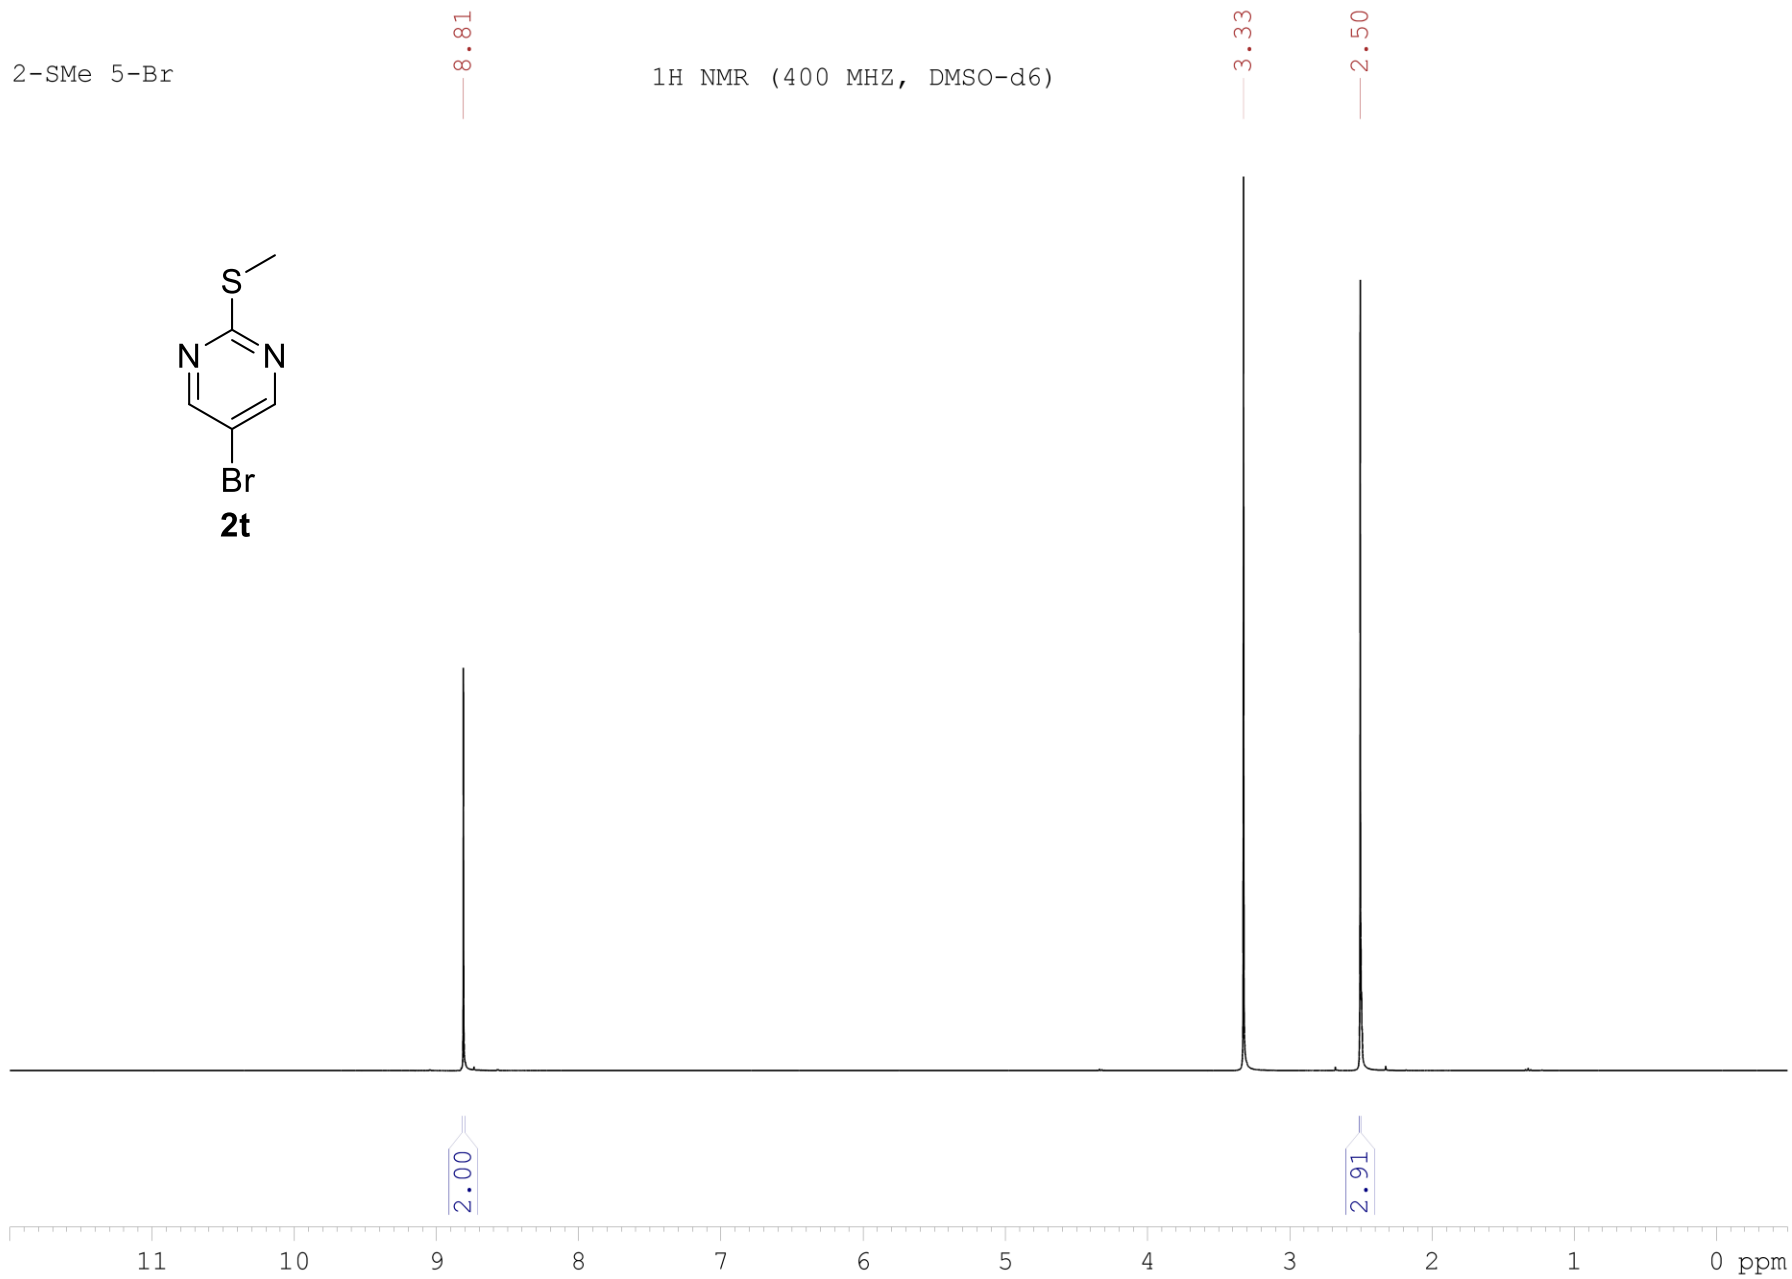

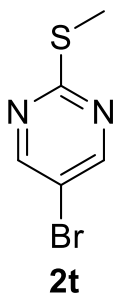

2-SMe 5-Br

<sup>13</sup>C NMR (100 MHz, DMSO-d<sub>6</sub>)

— 170.06

— 157.98

— 114.97

— 13.90

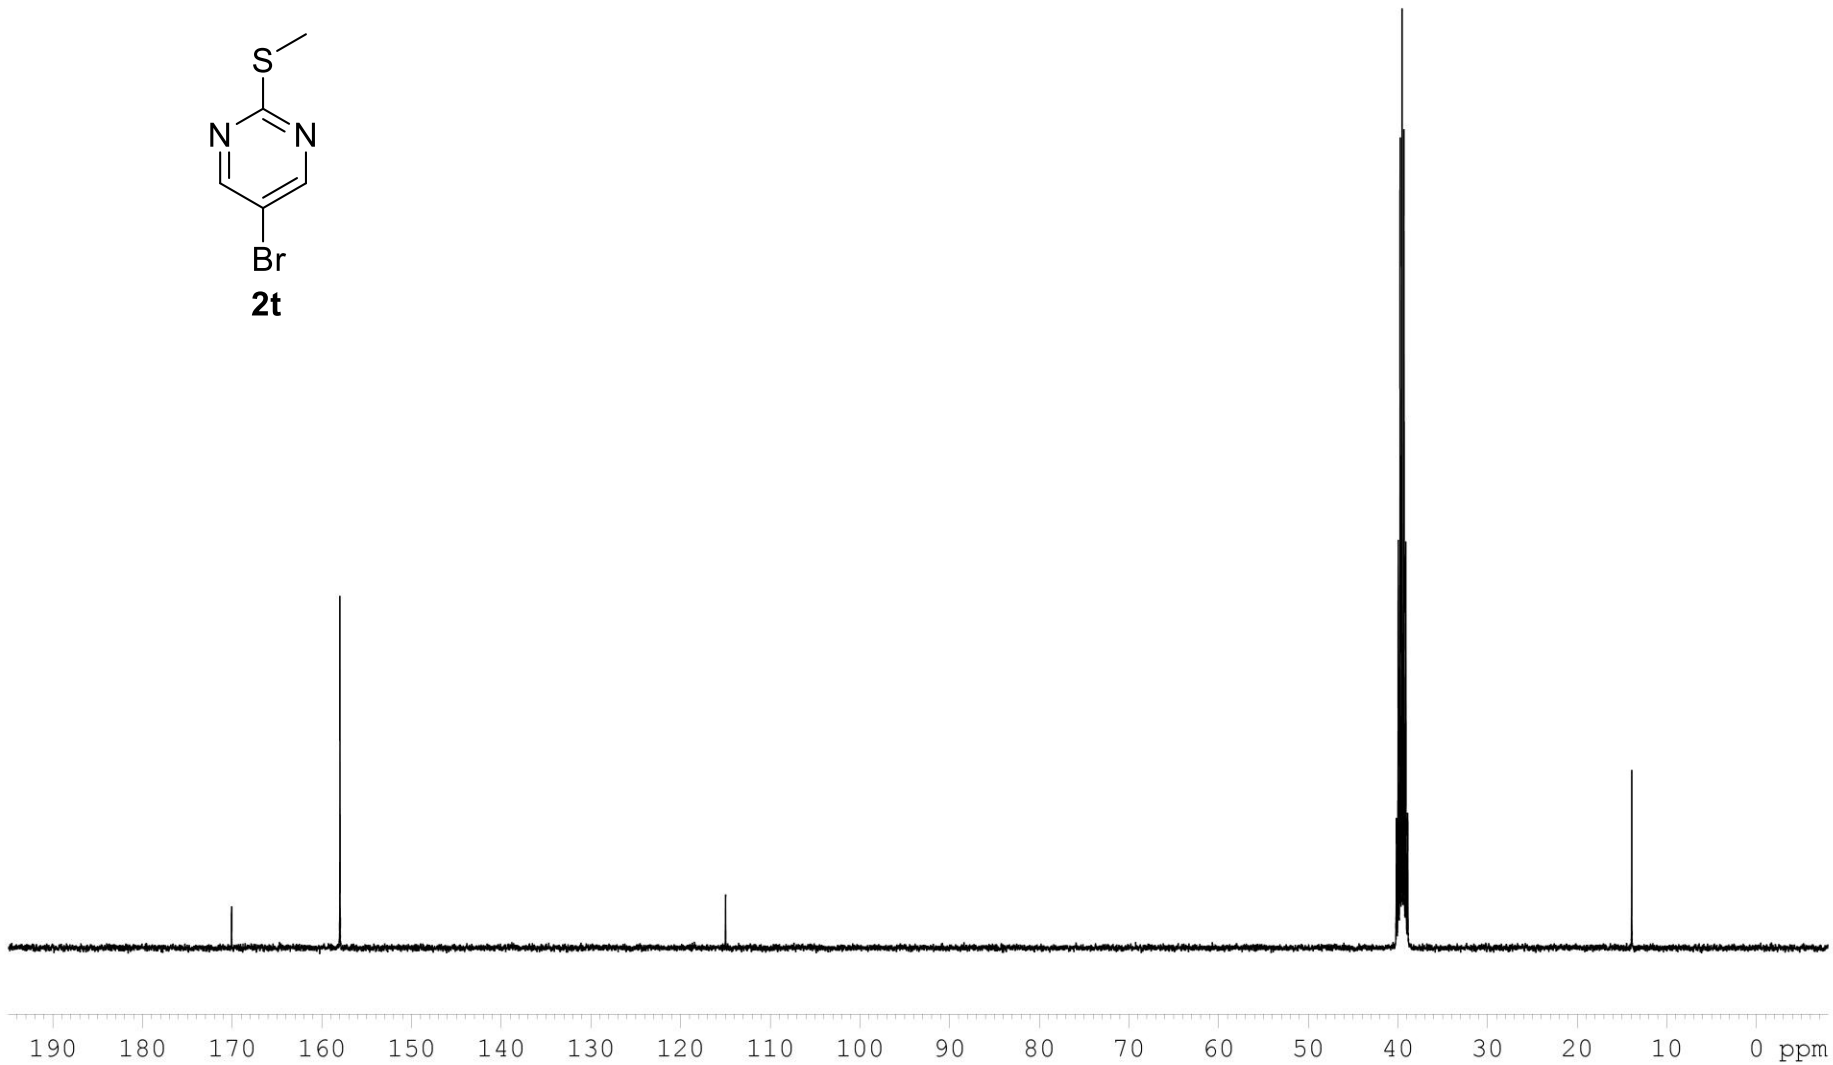

2-SMe 5-I  
1H NMR (400 MHz, DMSO-d6)

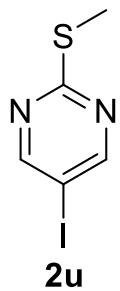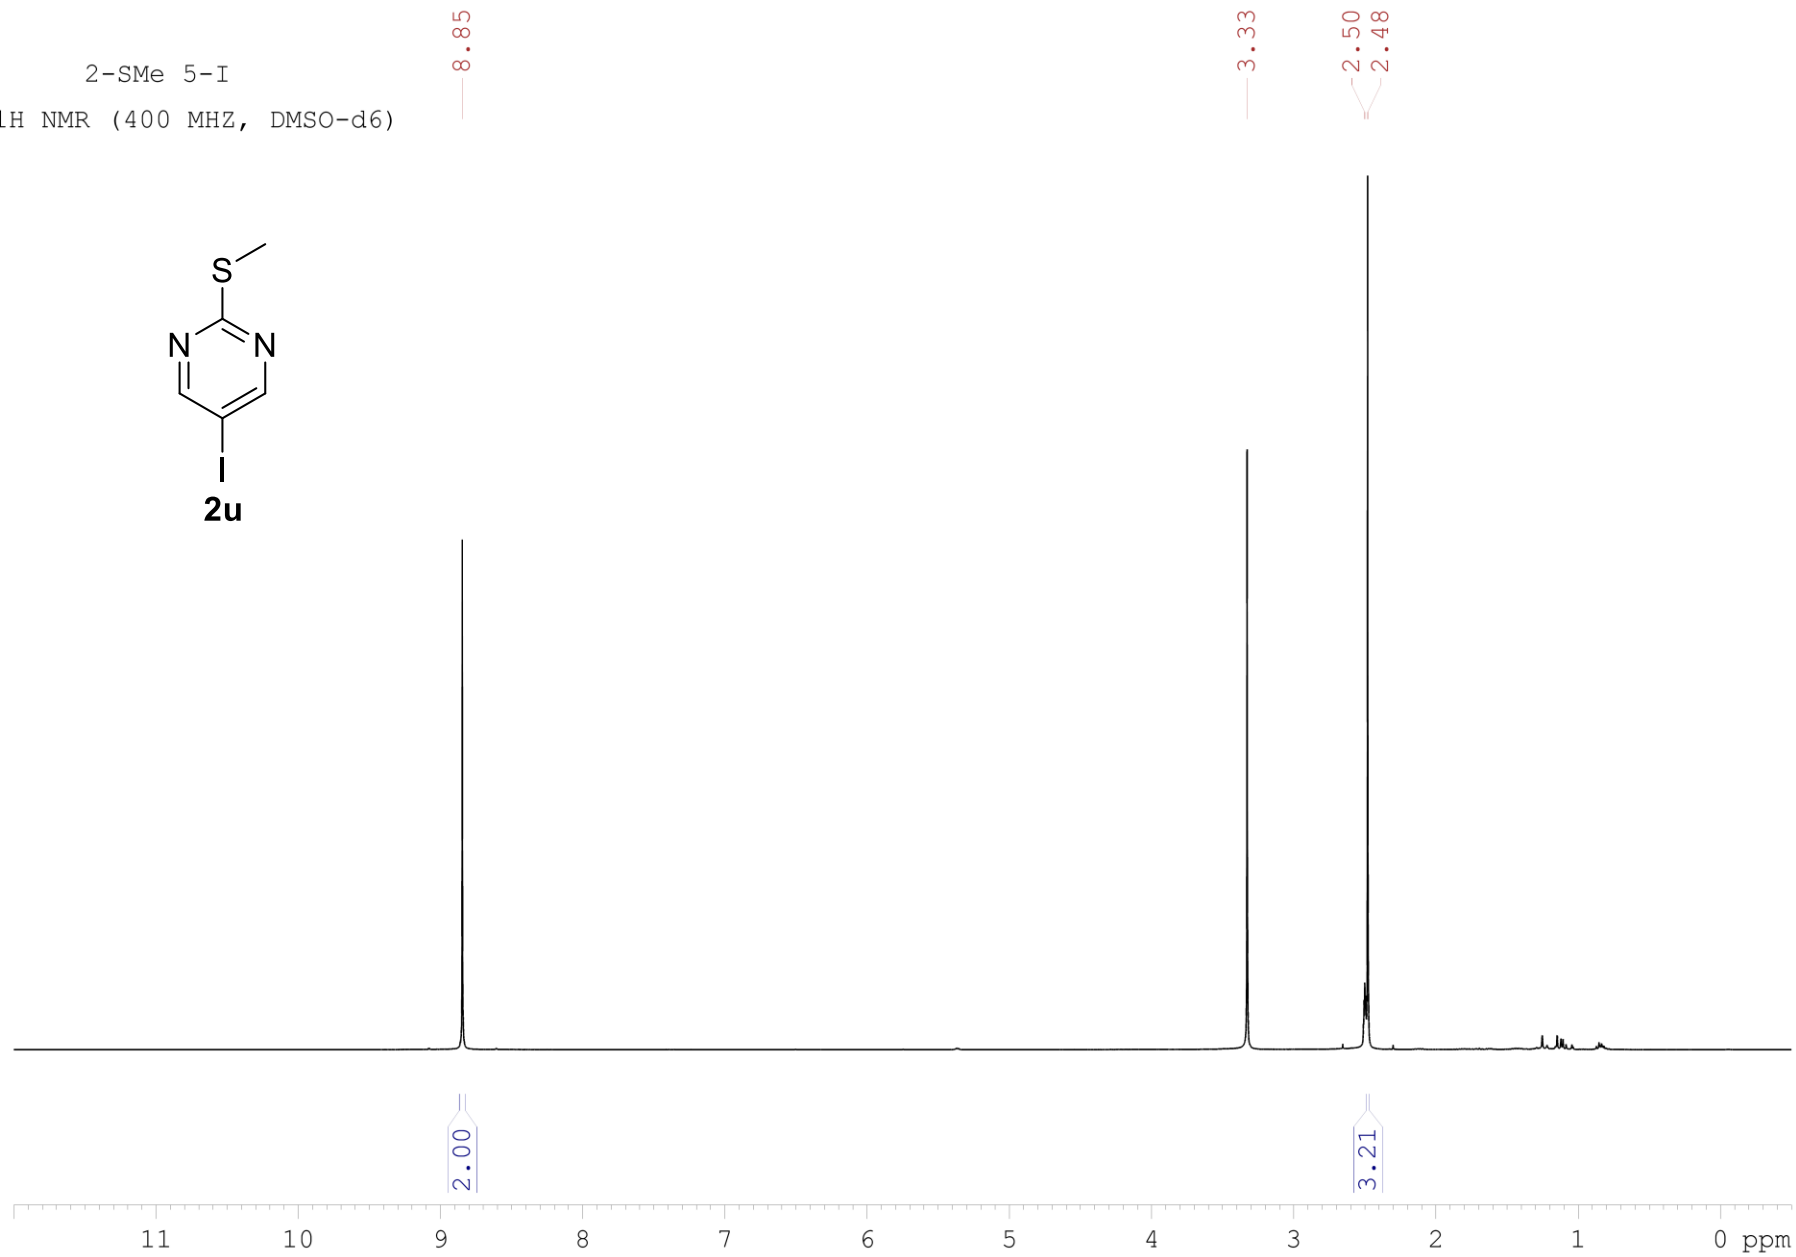

2-SMe 5-I

—170.05

—162.47

<sup>13</sup>C NMR (100 MHz, DMSO-d<sub>6</sub>)

—88.02

—13.71

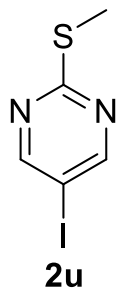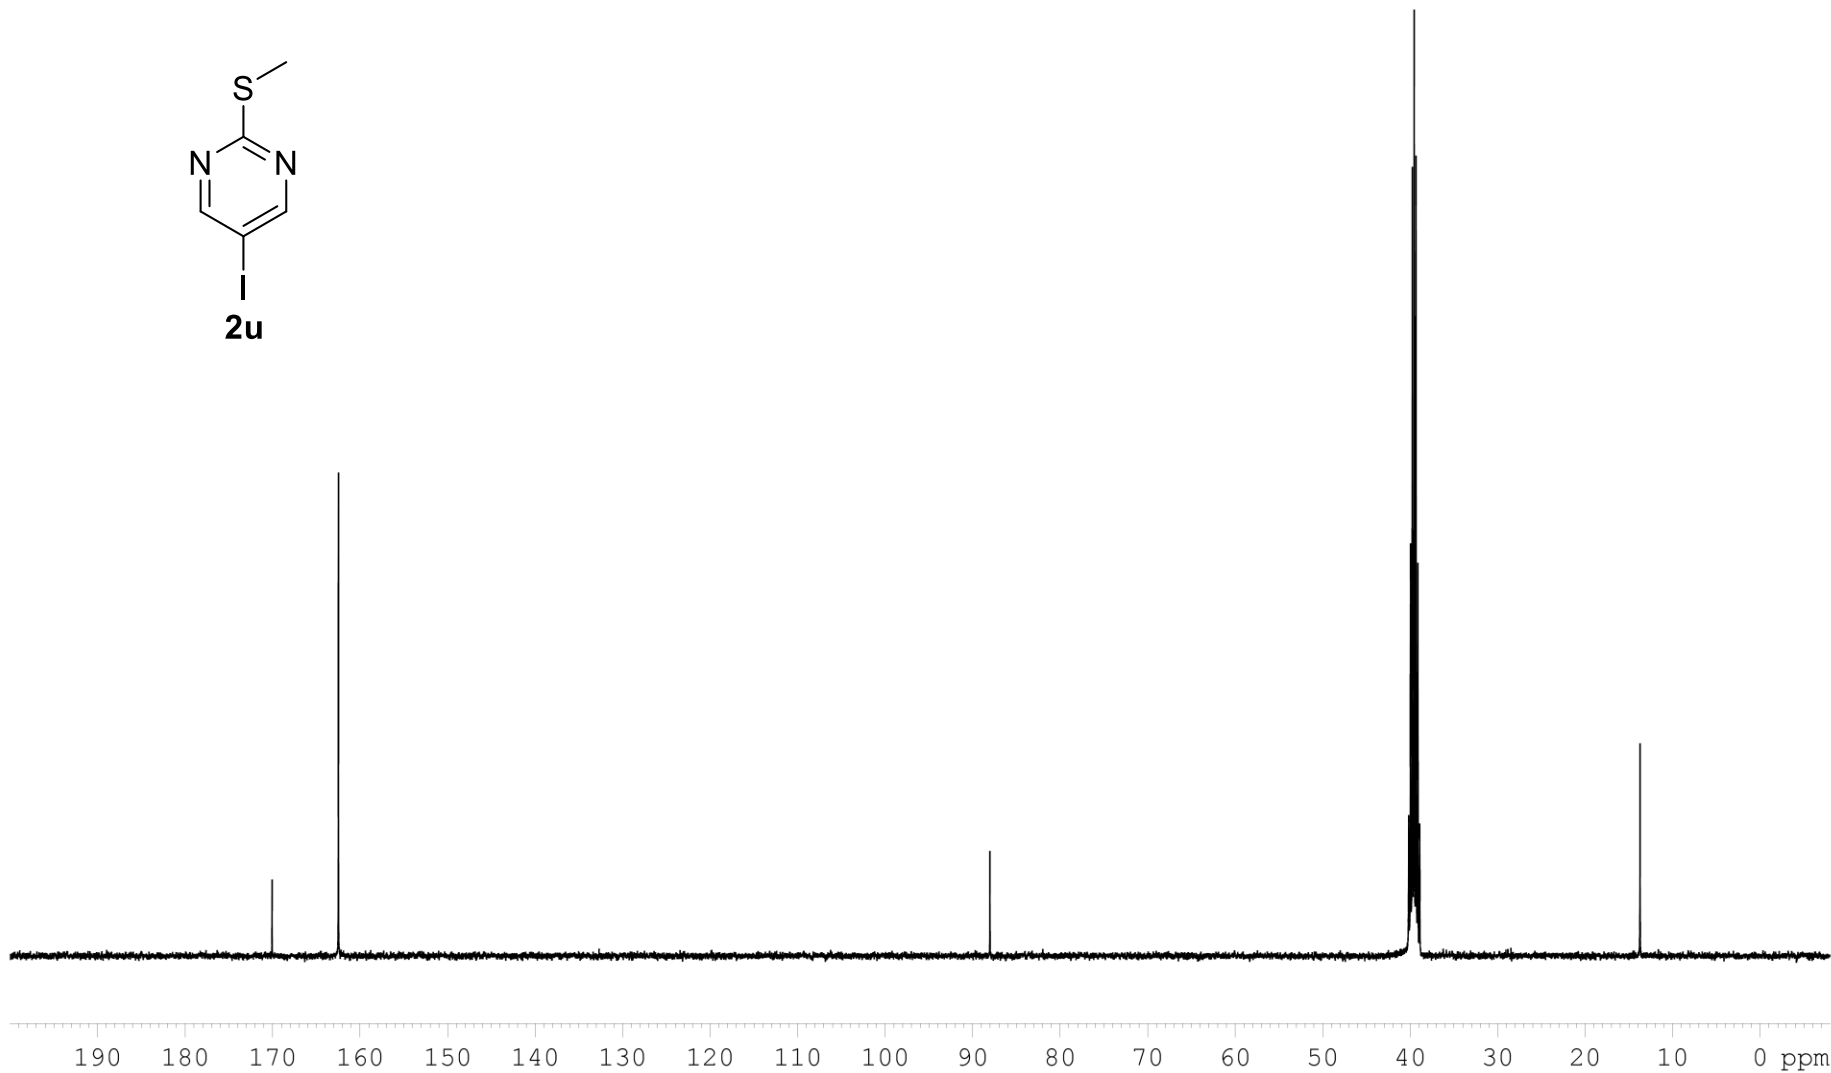

13.60

2-SMe 5-COOH

9.01

1H NMR (400 MHz, DMSO-d6)

3.32

2.58

2.50

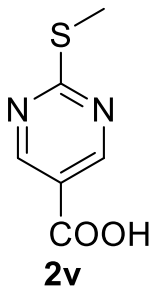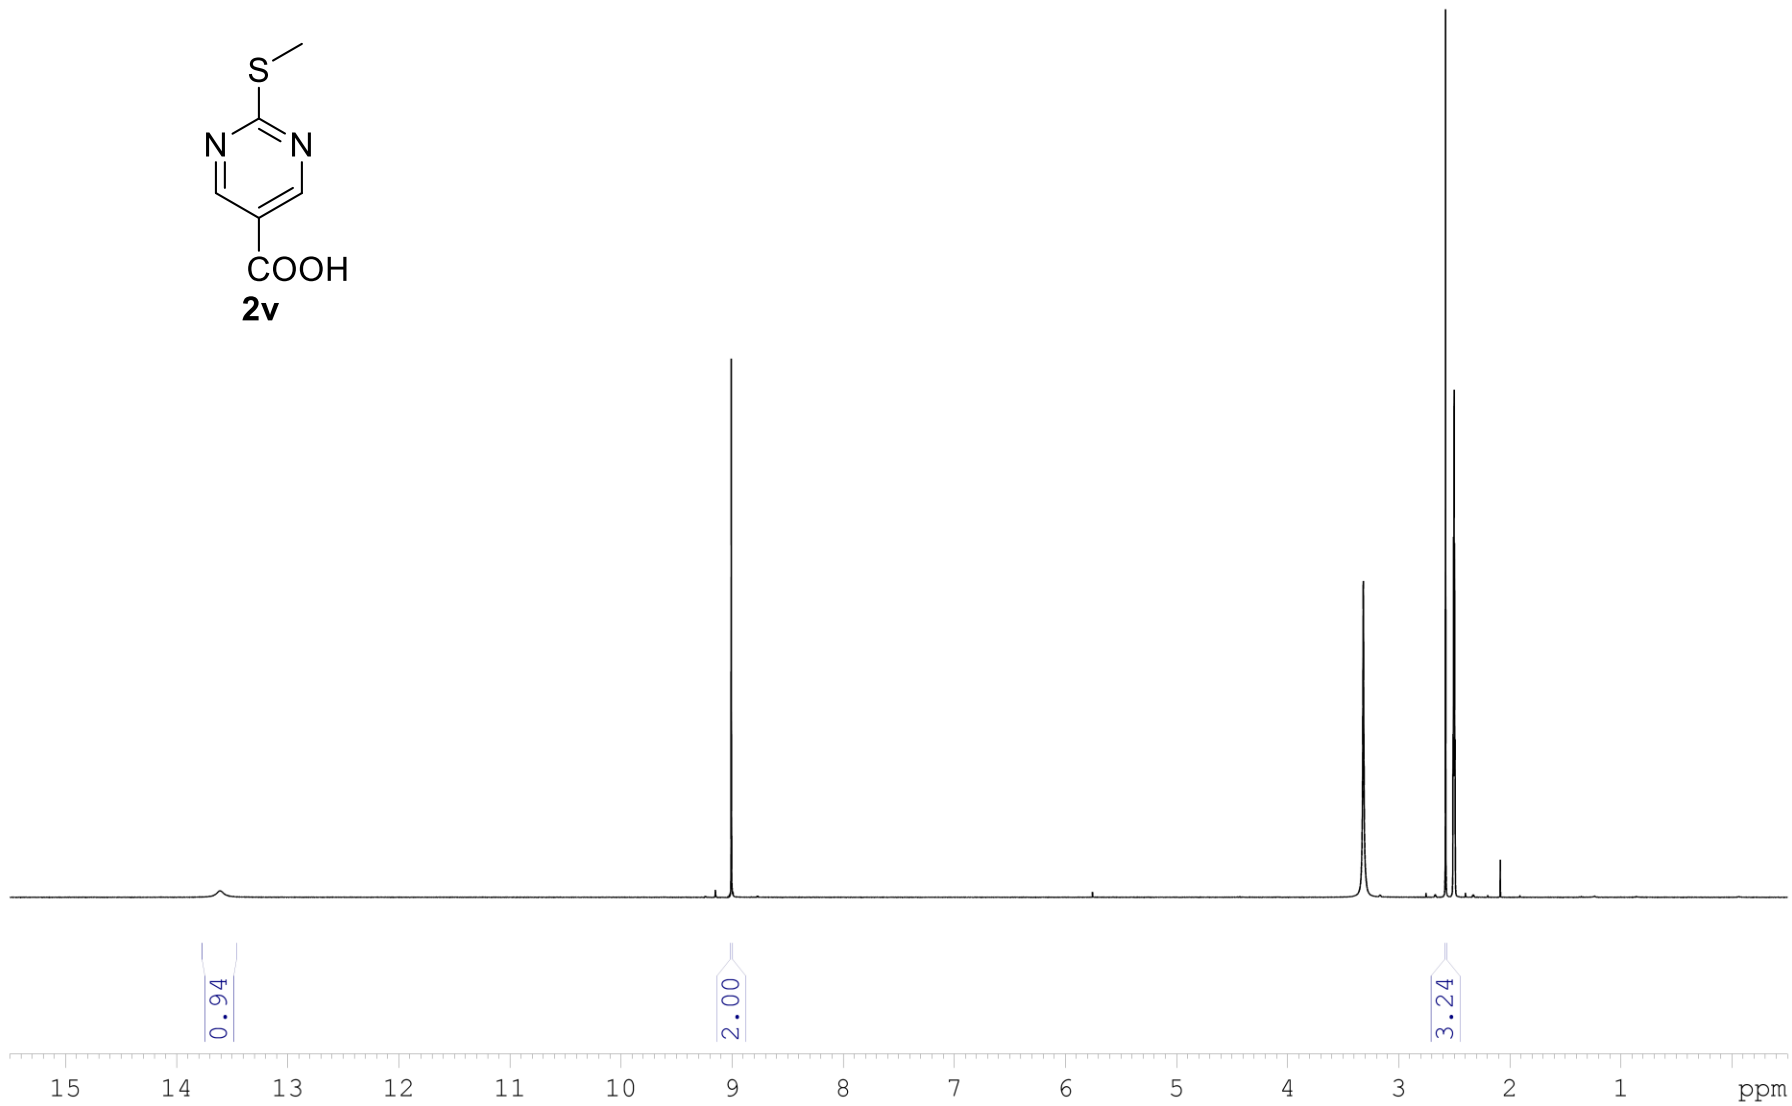

—175.80  
—164.94  
—158.11

2-SMe 5-COOH

<sup>13</sup>C NMR (100 MHz, DMSO-d<sub>6</sub>)

—120.03

—39.52

—13.82

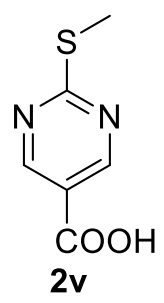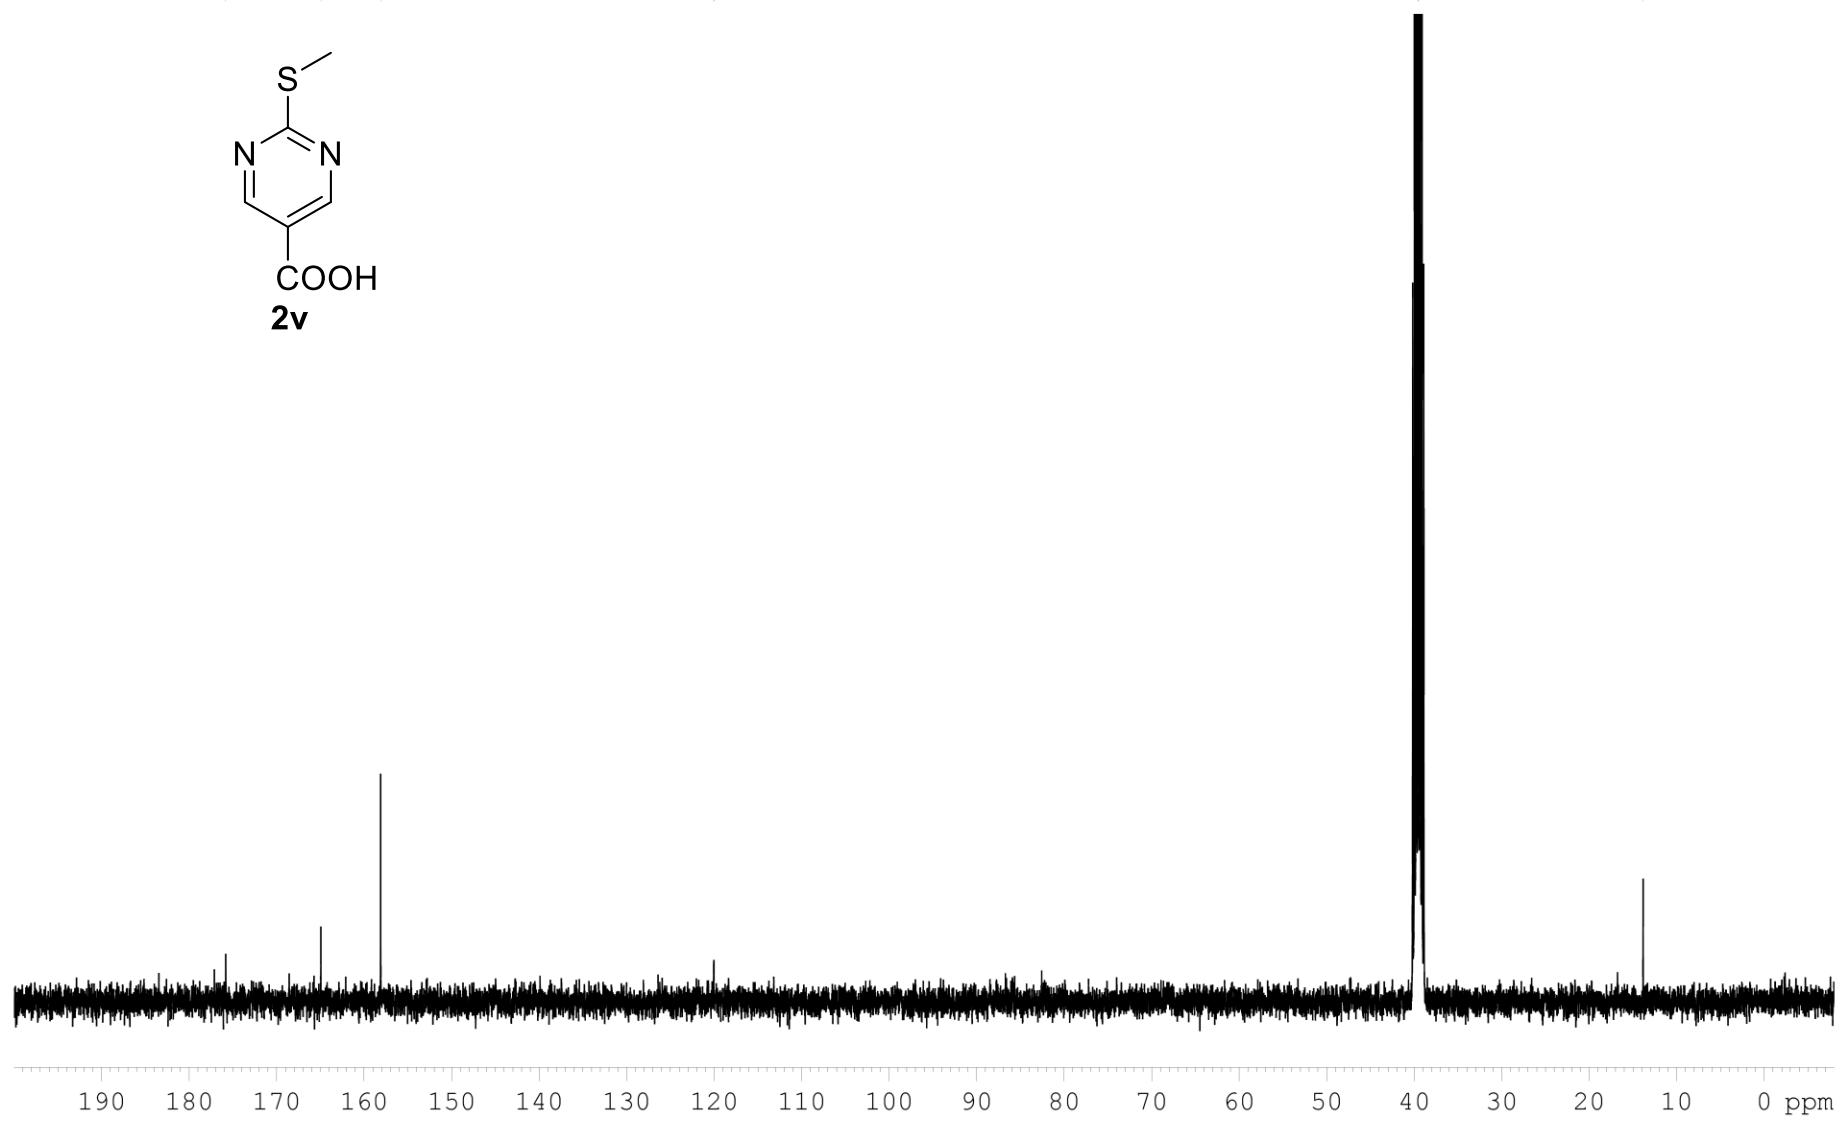

190 180 170 160 150 140 130 120 110 100 90 80 70 60 50 40 30 20 10 0 ppm



2-SMe 5-NO2

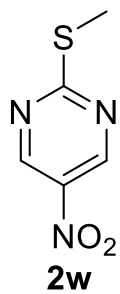

1H NMR (400 MHz, DMSO-d6)

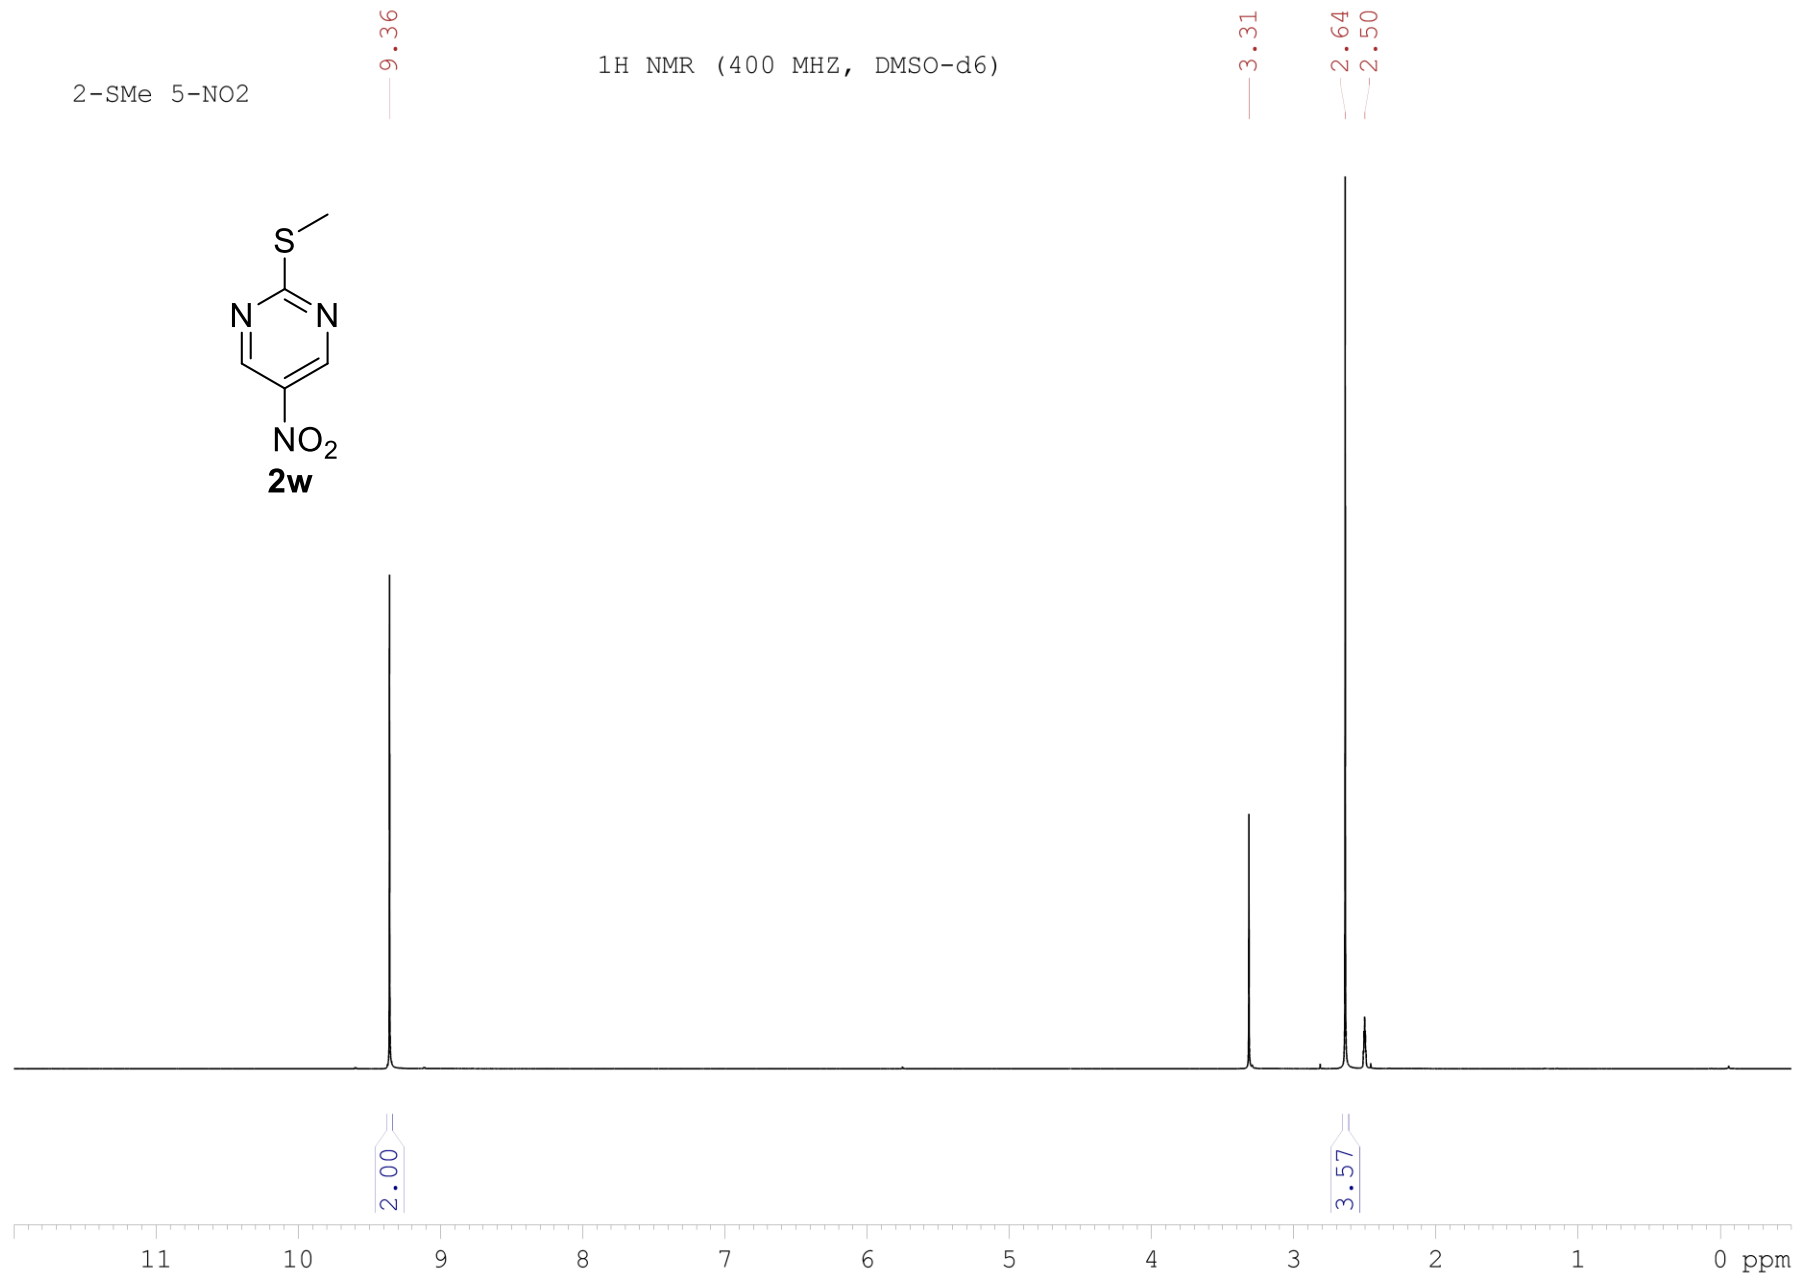

— 177.73

— 152.98

— 139.45

13C NMR (100 MHz, DMSO-d6)

2-SMe 5-NO2

— 14.37

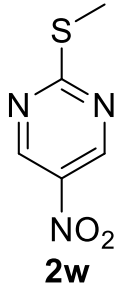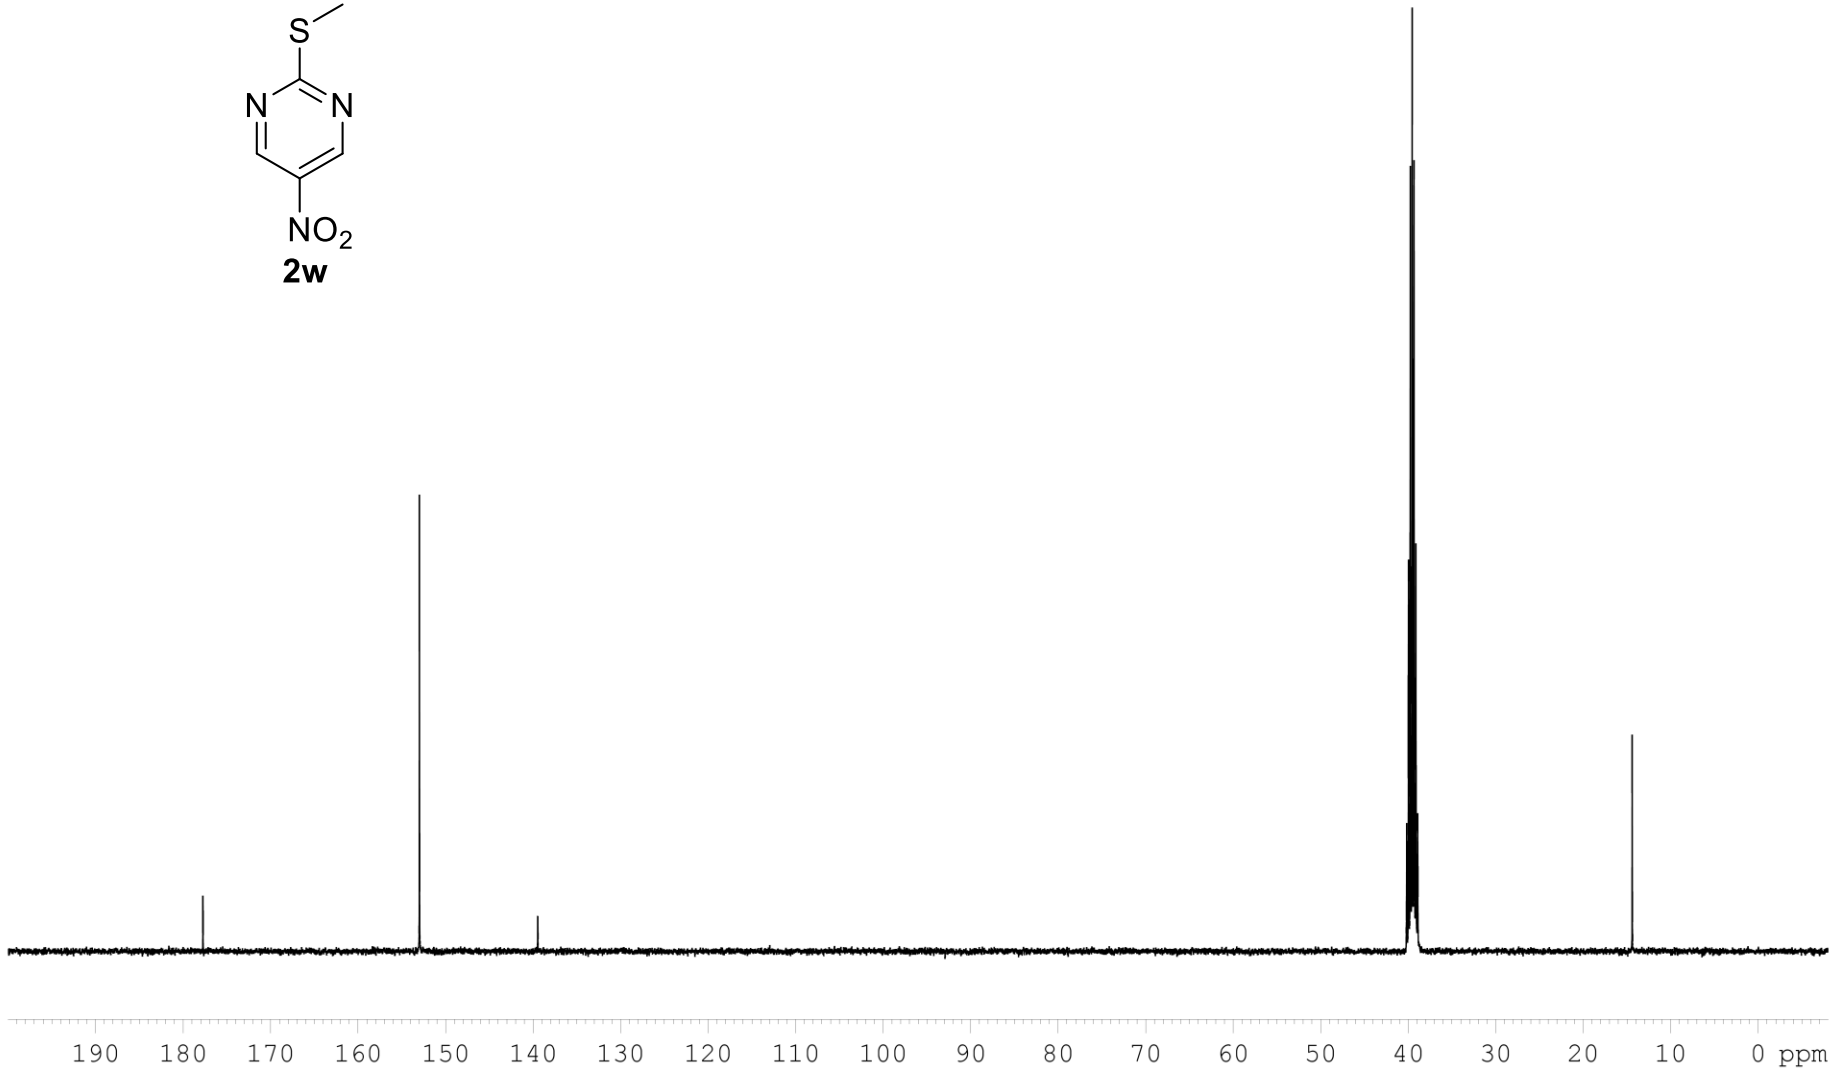

2-SMe 5-COOMe  
1H NMR (400 MHz, DMSO-d6)

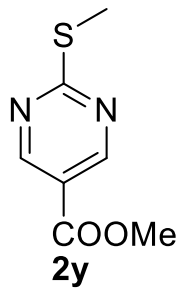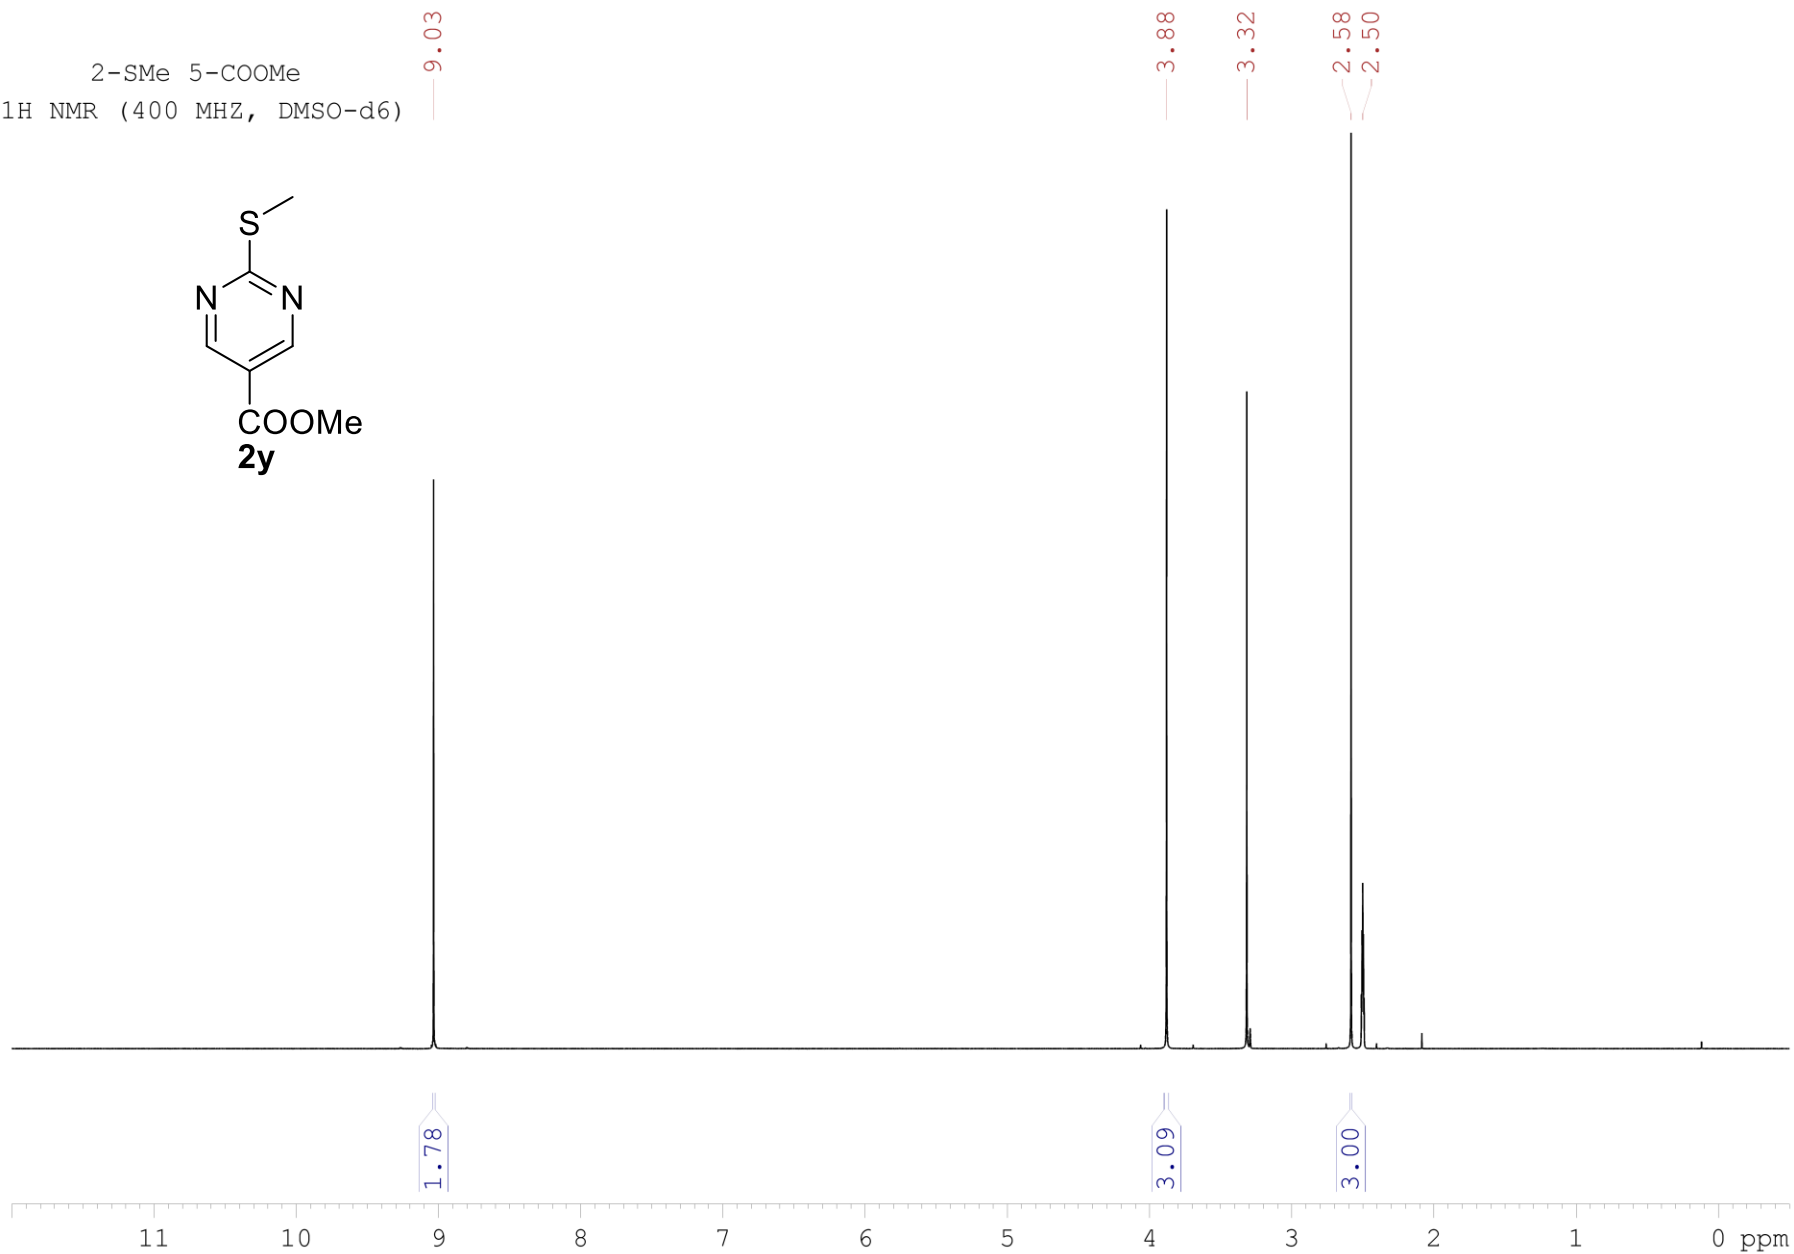

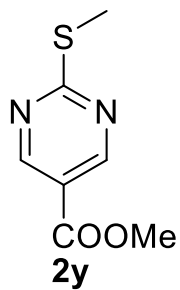

2-SMe 5-COOMe

<sup>13</sup>C NMR (100 MHz, DMSO-d<sub>6</sub>)

— 176.23

— 163.96

— 157.87

— 119.18

— 52.44

— 39.52

— 13.84

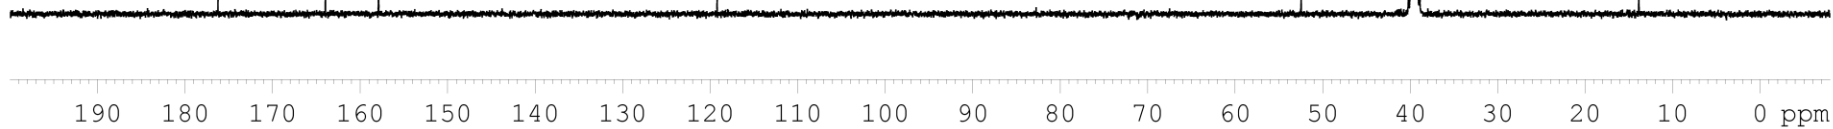

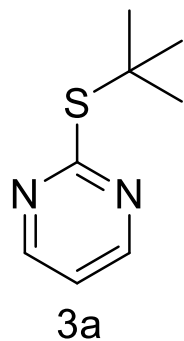

2-StBu pyrimidine  
1H NMR (400 MHz, DMSO-d6)

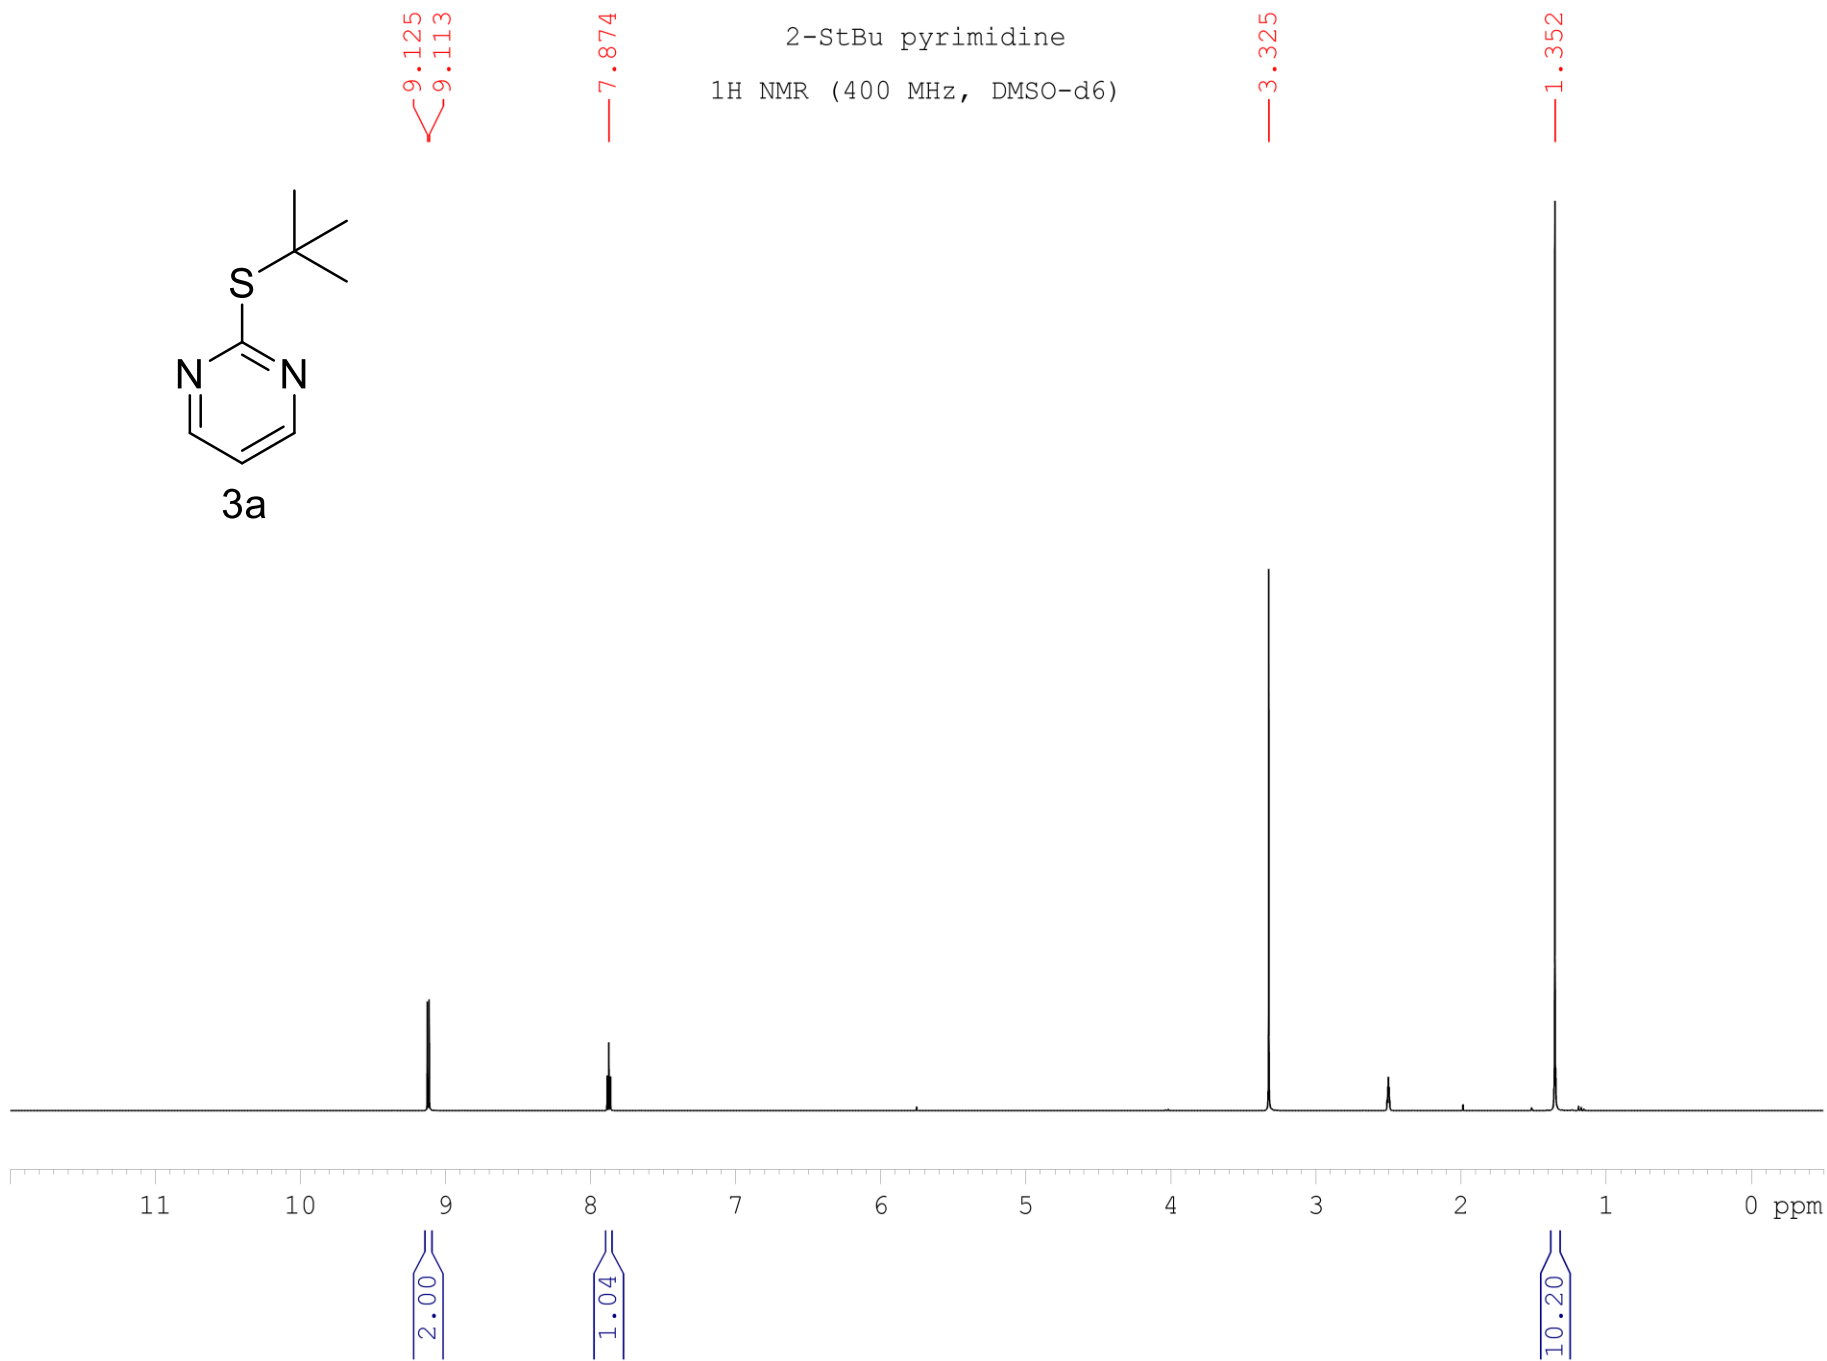

2-SnBu pyrimidine

<sup>1</sup>H NMR (400 MHz, DMSO-d<sub>6</sub>)

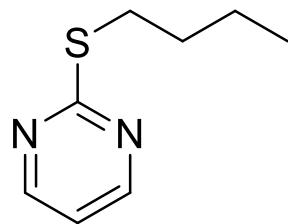

**3c**

8.62  
8.61

7.20  
7.19  
7.18

3.32  
3.12  
3.10  
3.09  
1.67  
1.66  
1.62  
1.60  
1.45  
1.44  
1.42  
1.40  
1.38  
1.36  
0.92  
0.90  
0.88

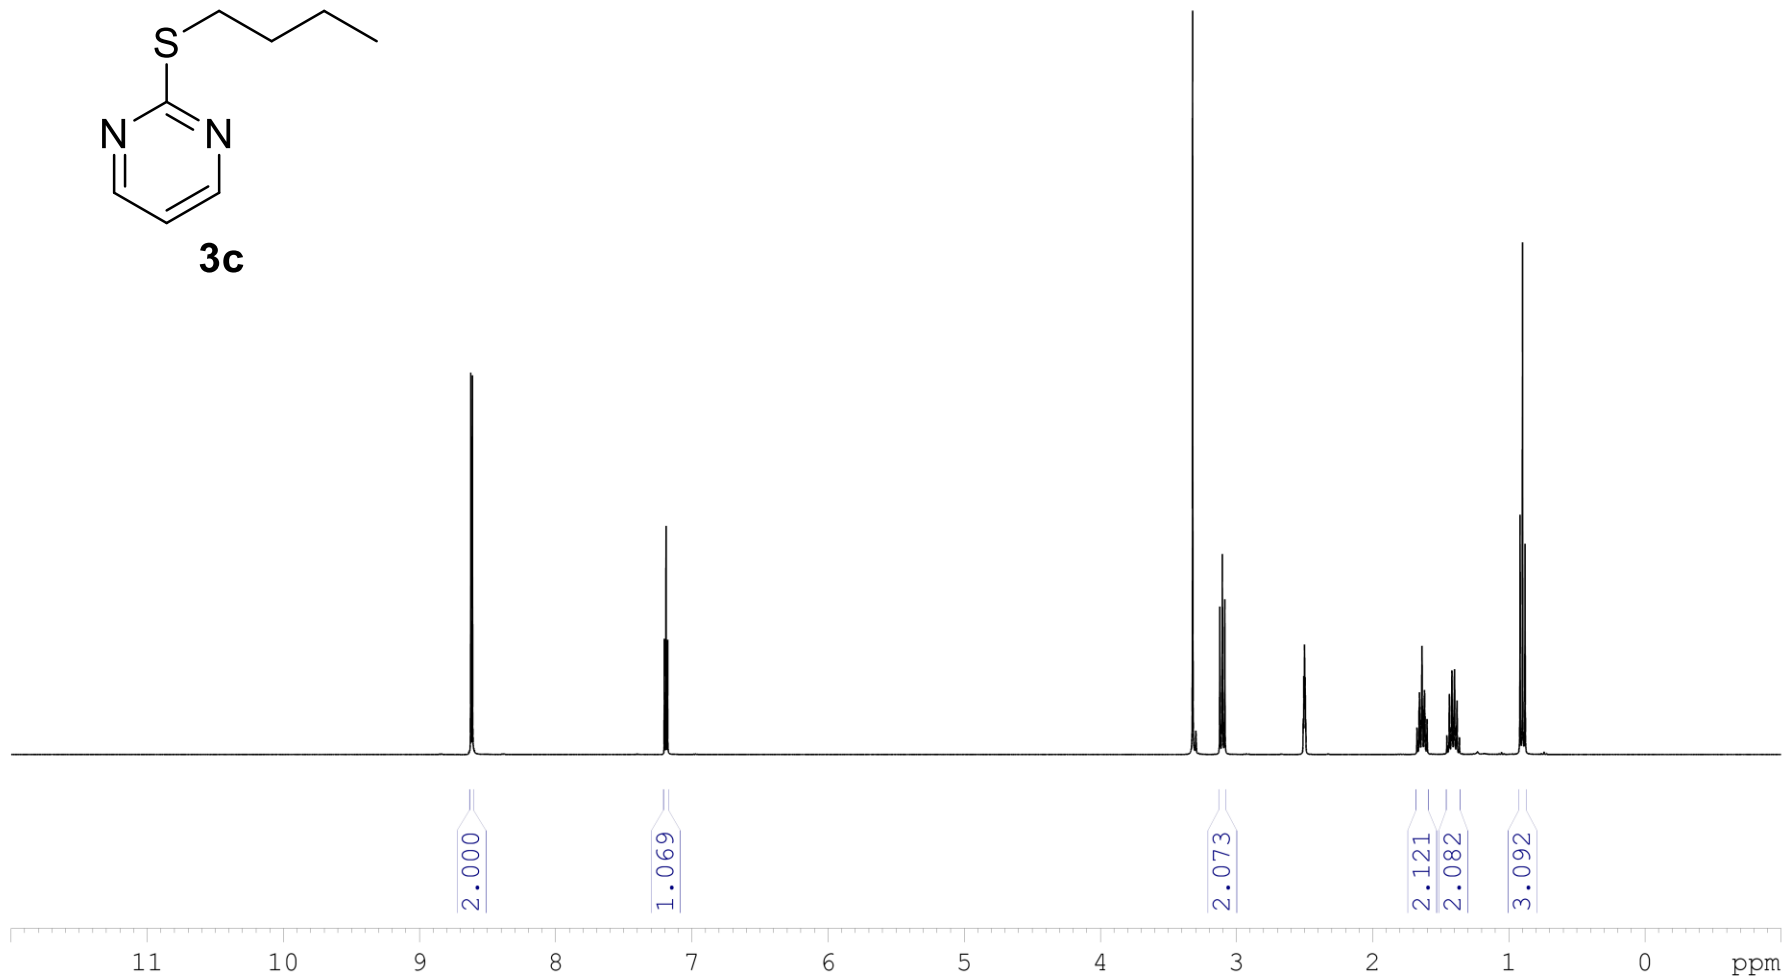

2-SnBu pyrimidine

$^{13}\text{C}$  NMR (100 MHz, DMSO- $d_6$ )

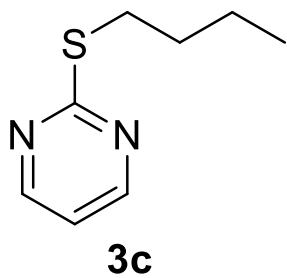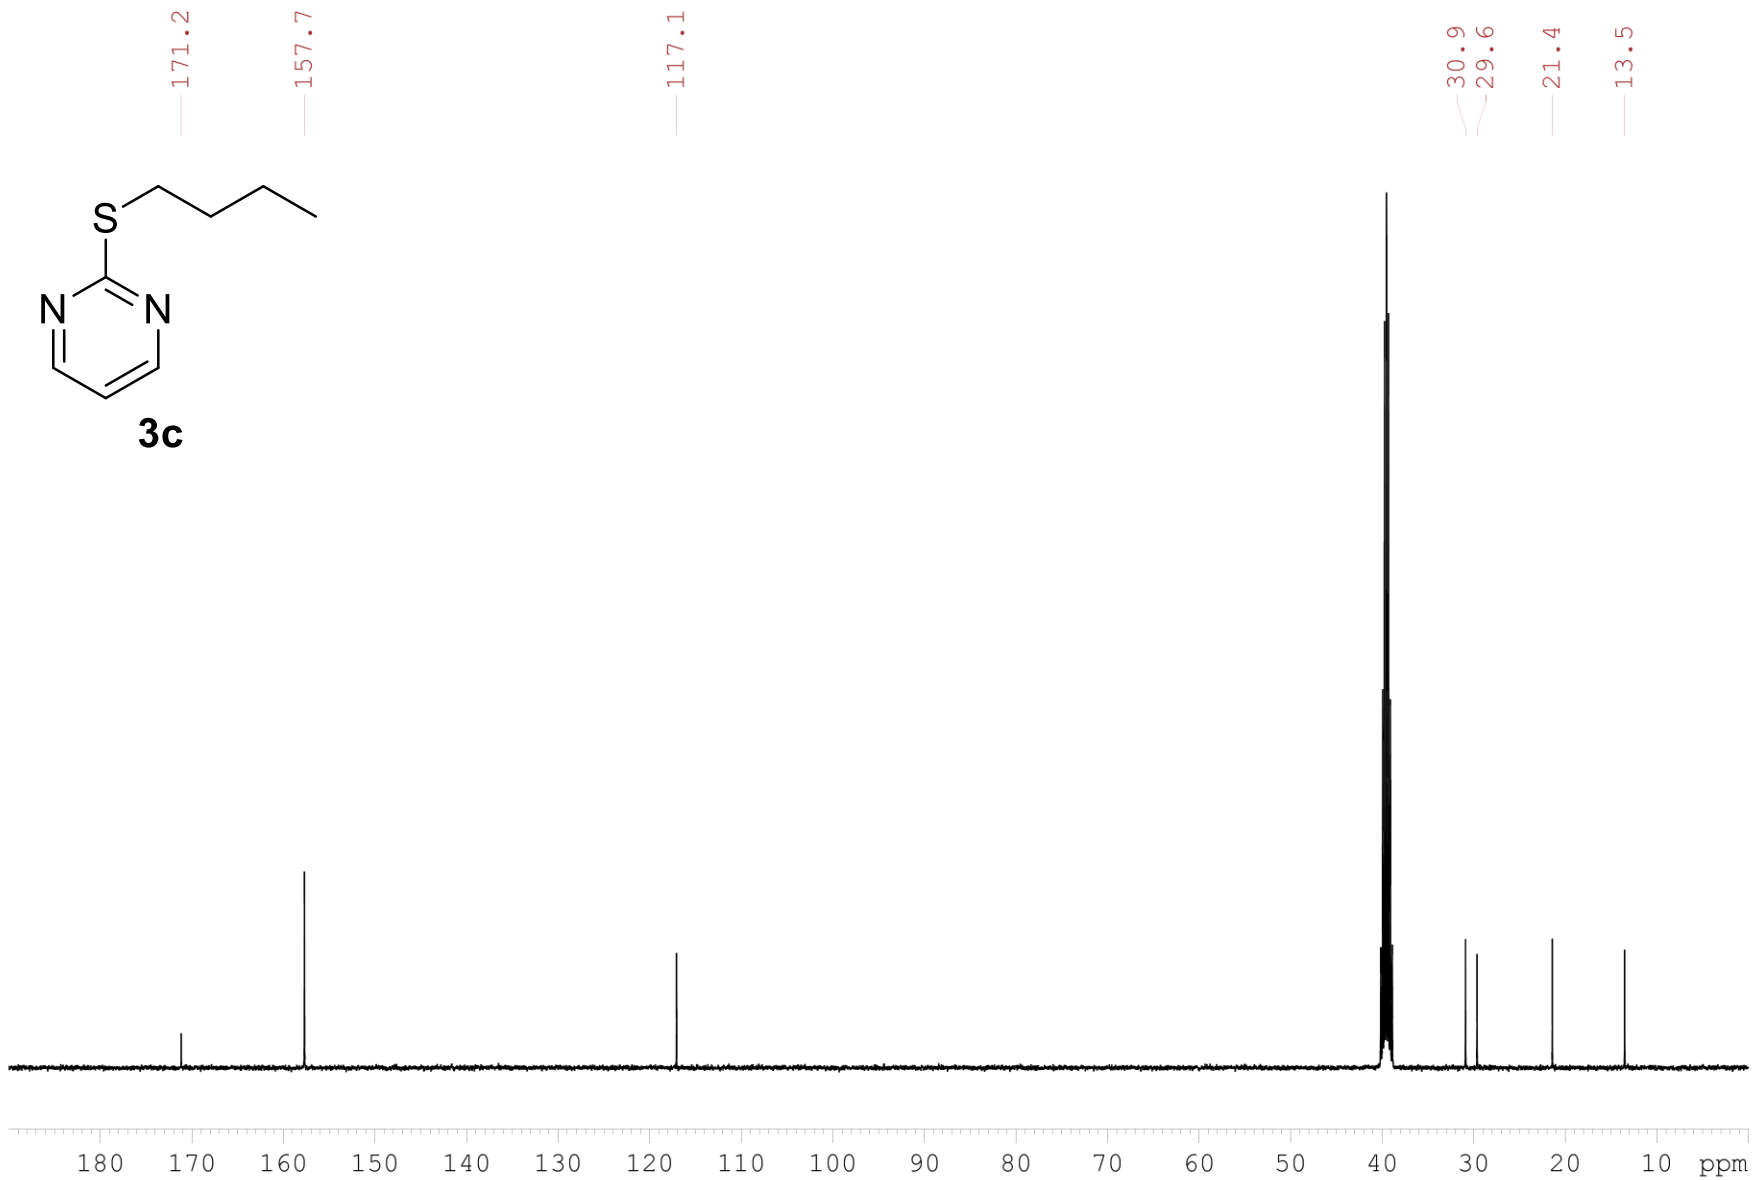

2-SPh pyrimidine

<sup>1</sup>H NMR (400 MHz, DMSO-d<sub>6</sub>)

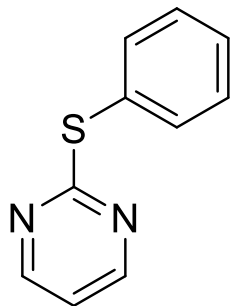

**3d**

8.60  
8.58  
7.62  
7.60  
7.59  
7.48  
7.47  
7.46  
7.25  
7.23  
7.22

3.33

2.50

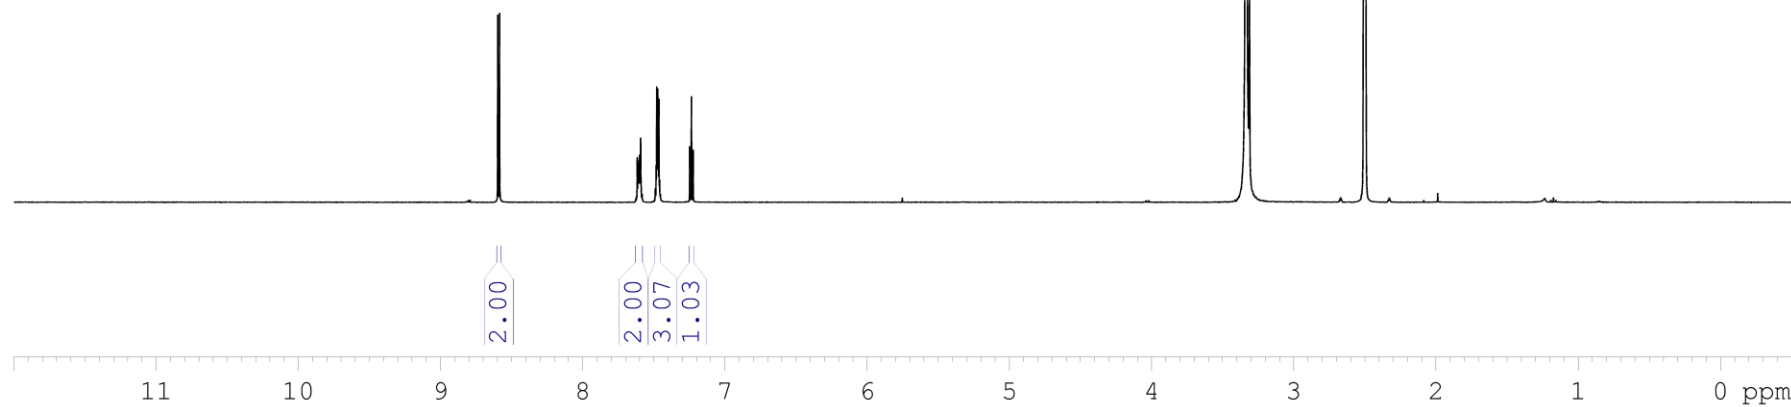



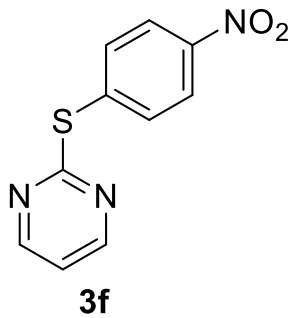

8.67  
8.66  
8.29  
8.27  
7.93  
7.90  
7.35  
7.33  
7.32

2-S (p-NO<sub>2</sub>Ph)  
1H (400 MHz, DMSO-d<sub>6</sub>)

3.33

2.50

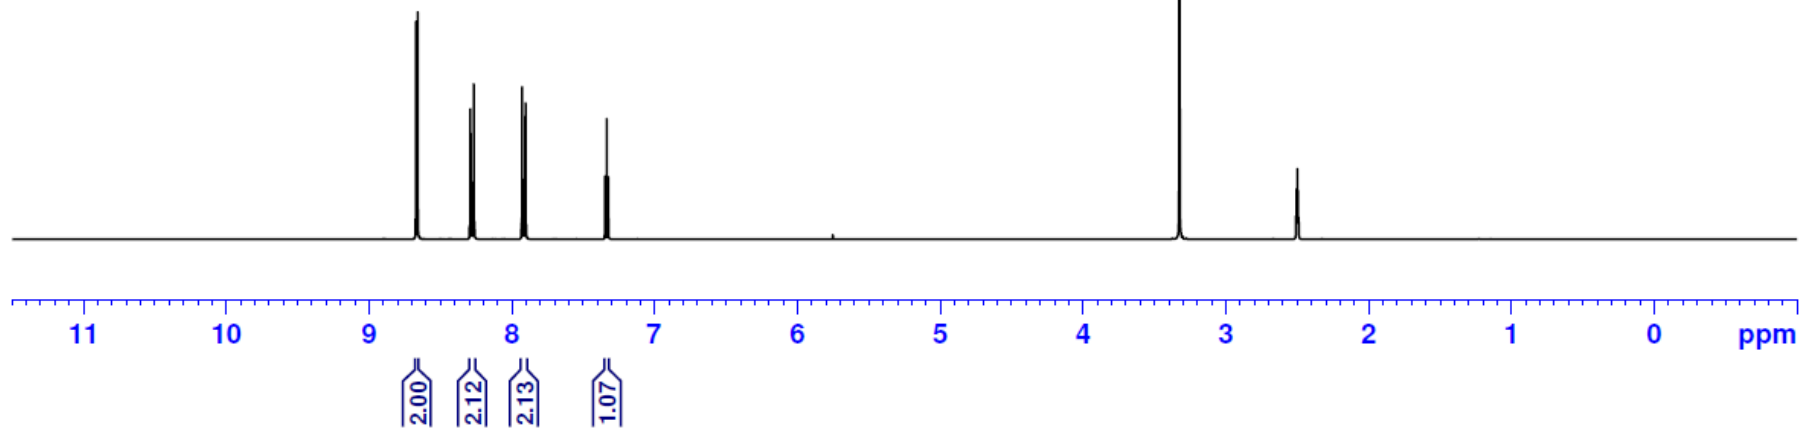

2-S (p-NO<sub>2</sub>Ph)  
13C (100 MHz, DMSO-d<sub>6</sub>)

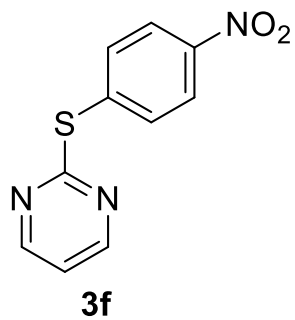

169.33  
158.42  
147.49  
138.06  
134.96  
123.99  
118.77

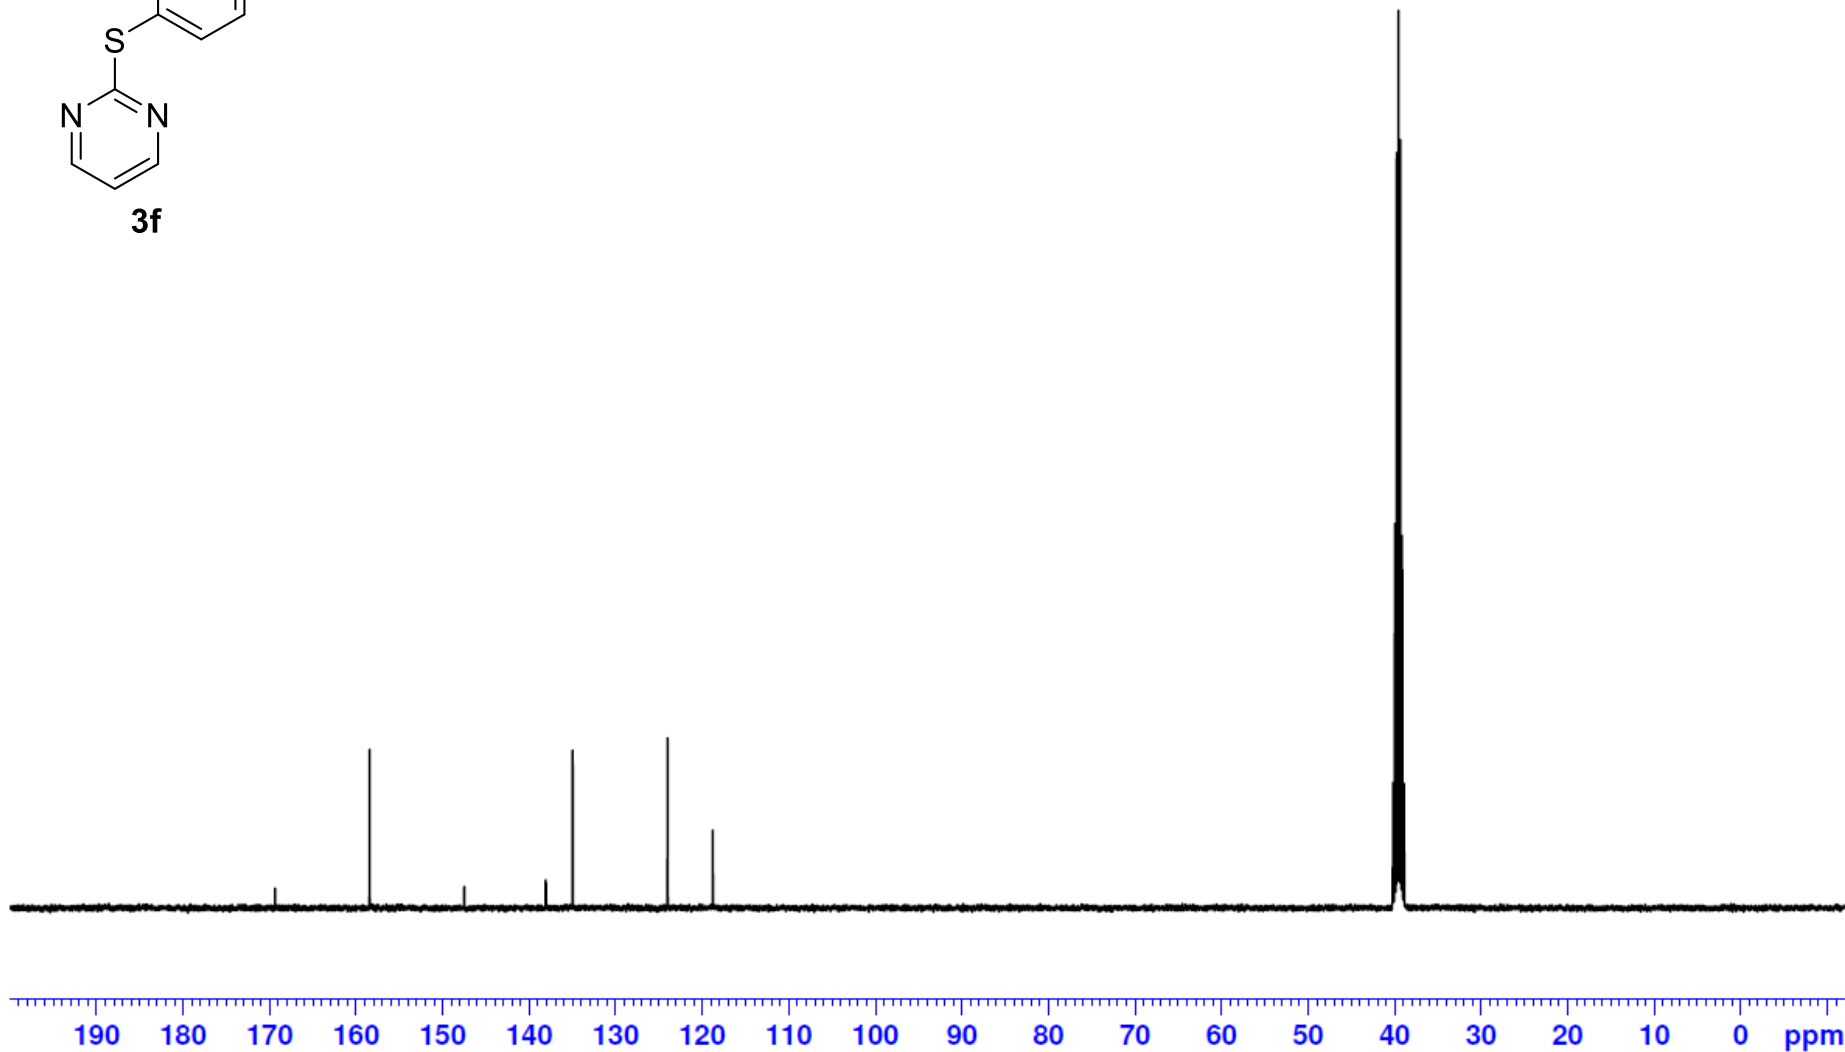

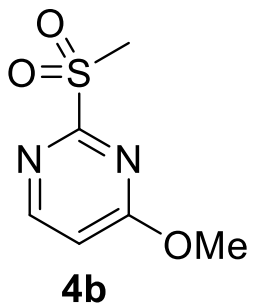

2-SO<sub>2</sub>Me 4-OMe  
1H NMR (400 MHz, DMSO-d<sub>6</sub>)

8.75  
8.74

7.26  
7.25

4.03

3.40  
3.32

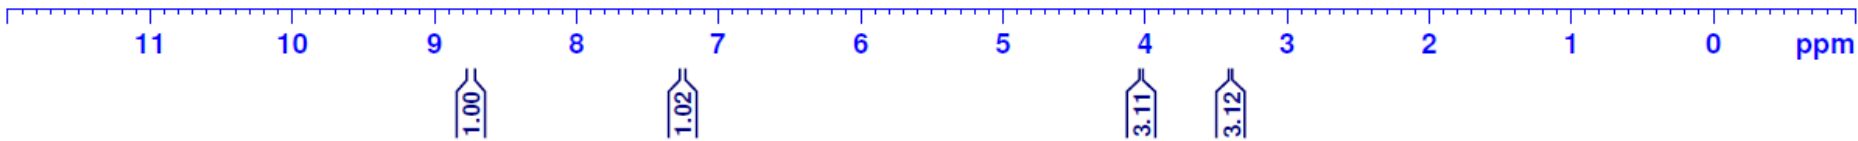

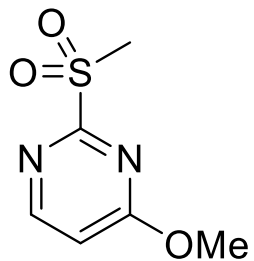

**4b**

170.11  
165.01  
158.60

111.23

2-SO<sub>2</sub>Me 4-OMe  
13C (100MHz, DMSO-d<sub>6</sub>)

54.89

38.89

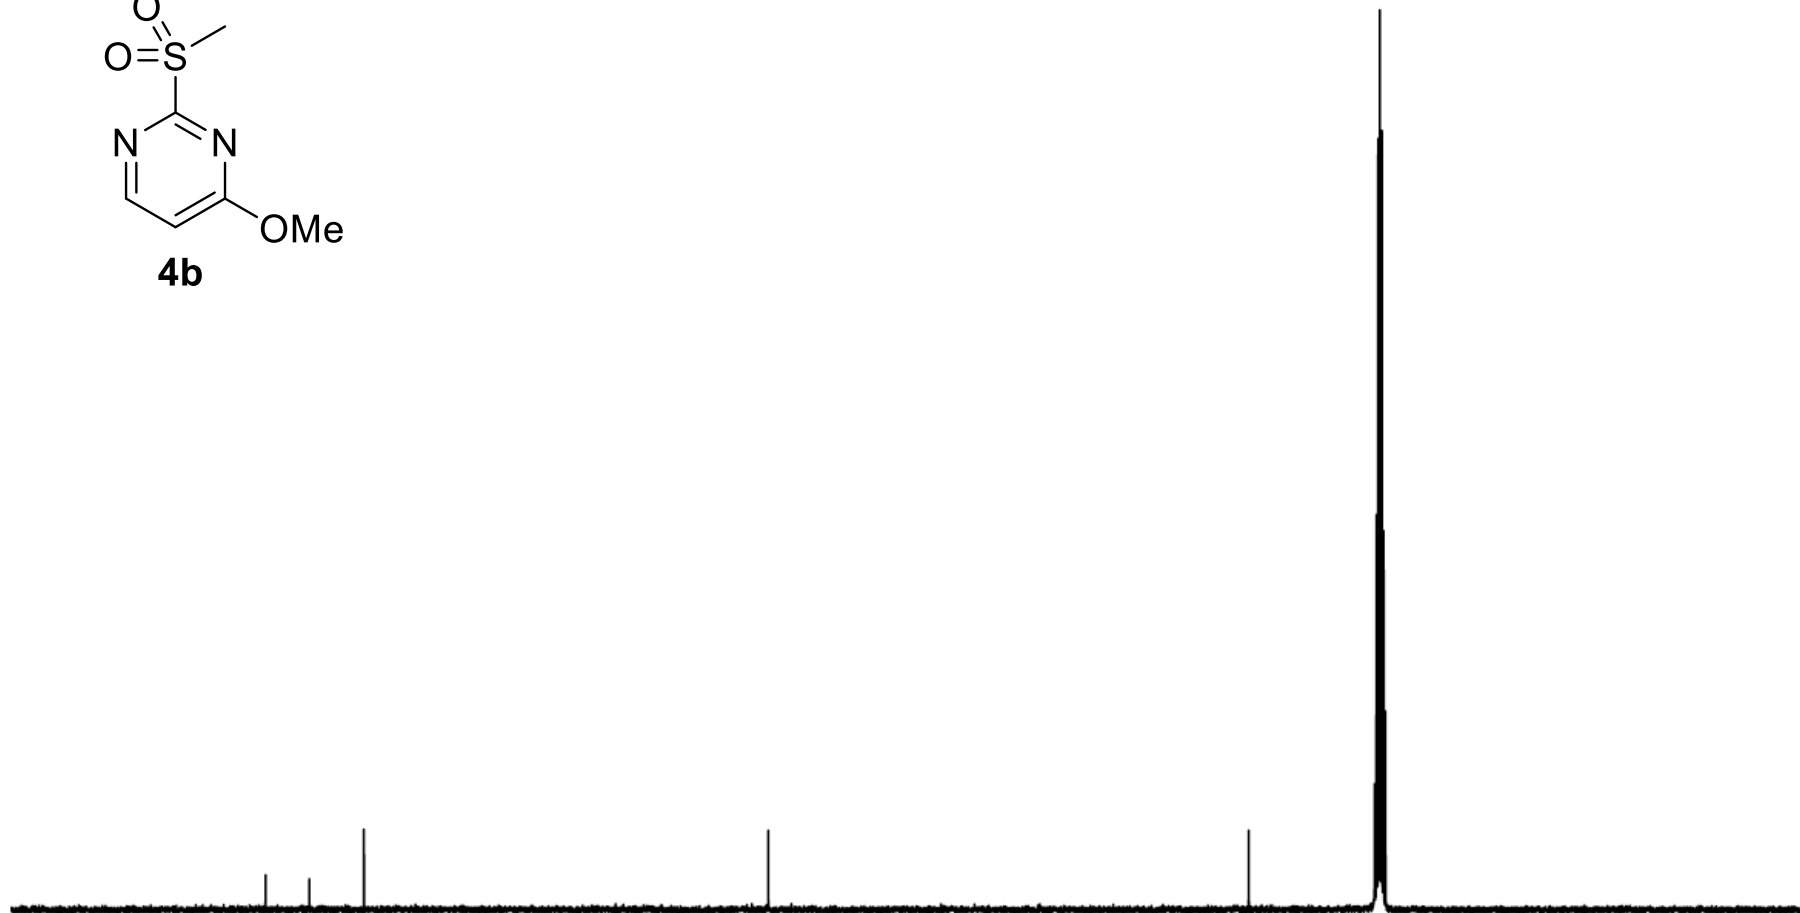

190 180 170 160 150 140 130 120 110 100 90 80 70 60 50 40 30 20 10 0 ppm

2-SO<sub>2</sub>Me 4-Me pyrimidine

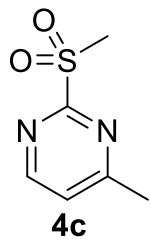

<sup>1</sup>H NMR (400 MHz, DMSO-d<sub>6</sub>)

8.911  
8.898

7.730  
7.729  
7.718  
7.716

3.385  
3.323

2.611  
2.610  
2.500

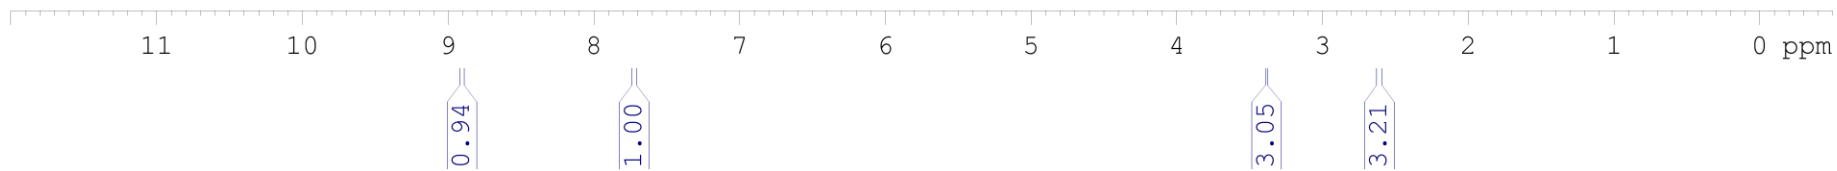

2-SO<sub>2</sub>Me 4-COOH

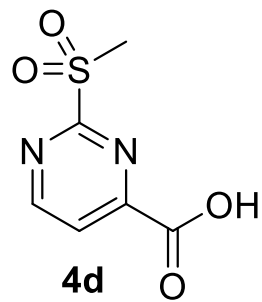

<sup>1</sup>H NMR (400 MHz, DMSO-d<sub>6</sub>)

9.32  
9.31

8.27  
8.26

3.45  
3.37

2.50  
2.30

1.91

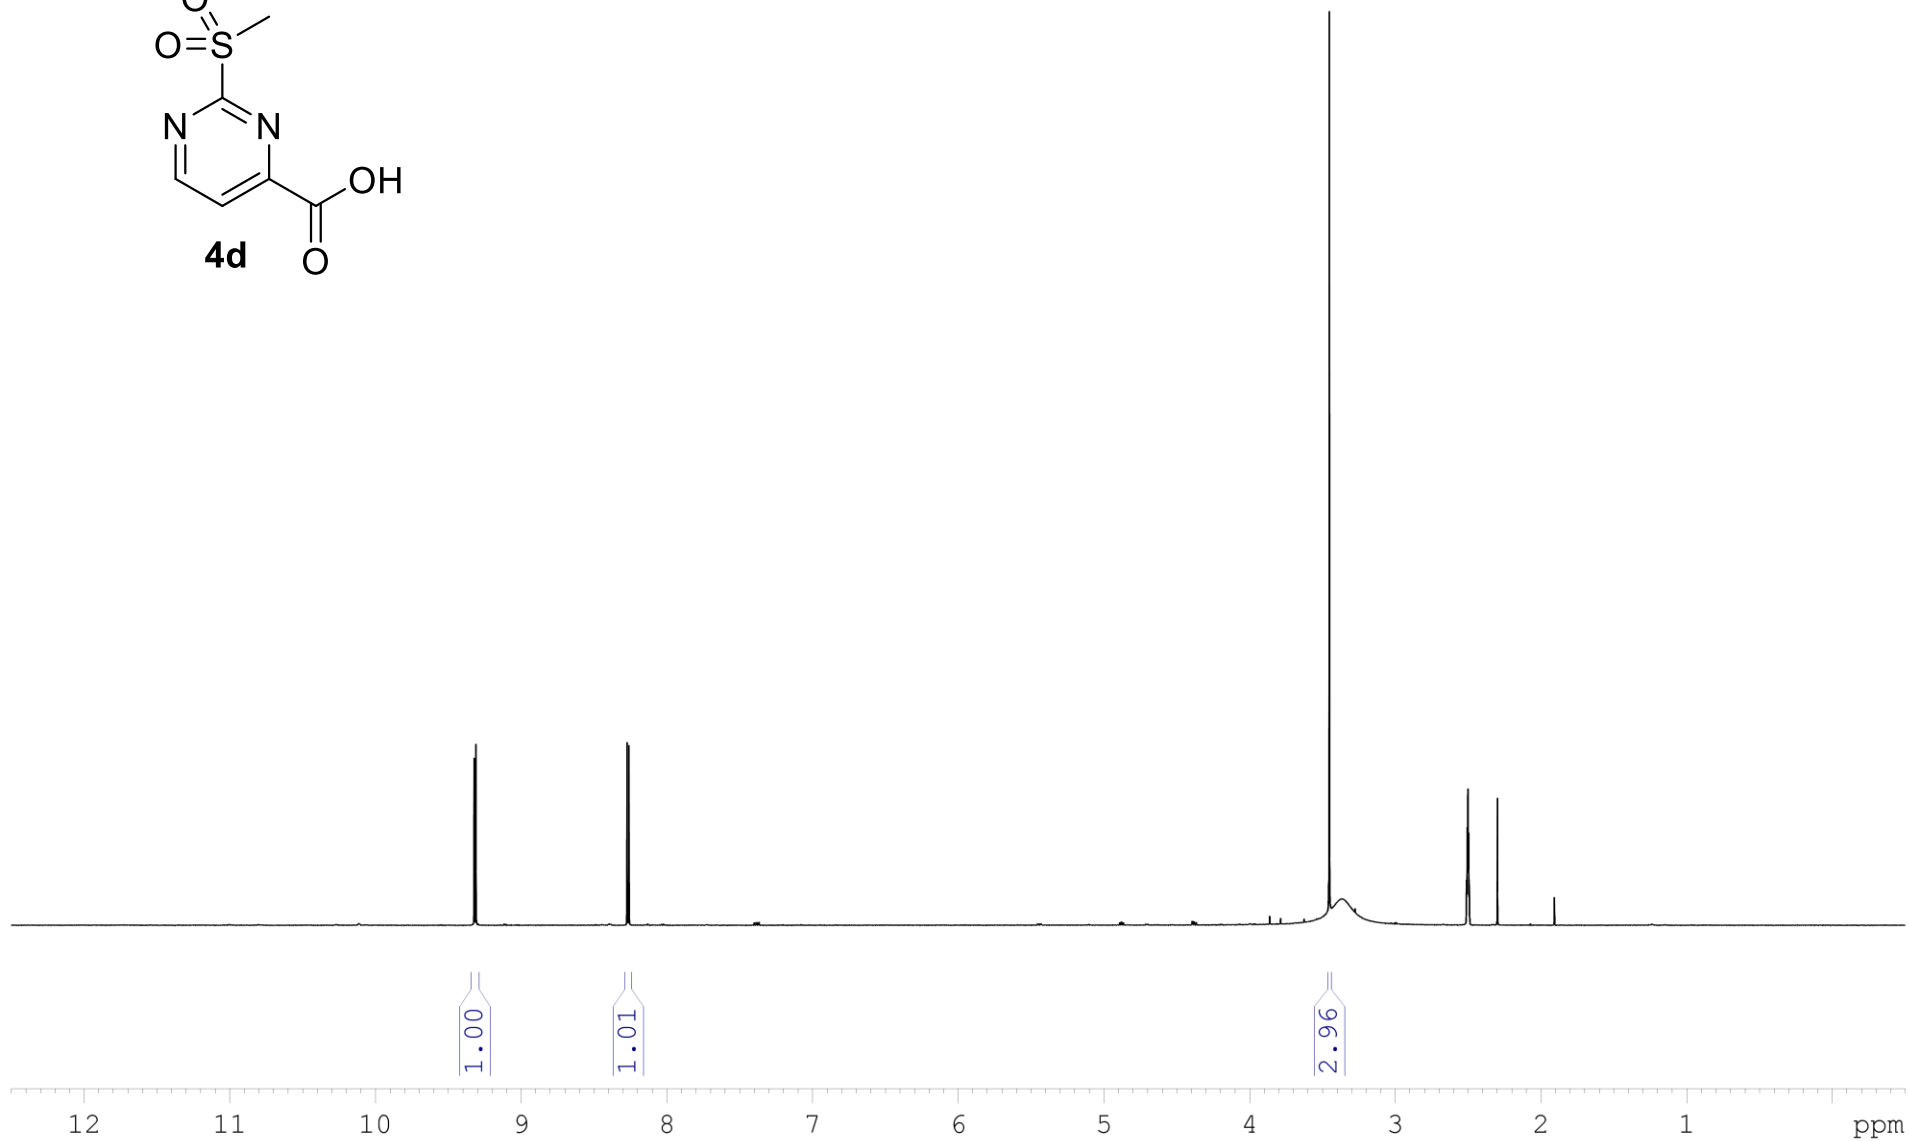

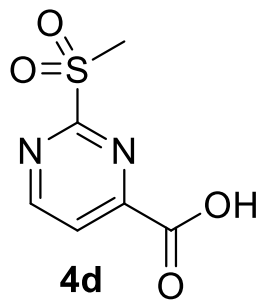

165.76  
163.99  
161.67  
157.13

123.61

<sup>13</sup>C NMR (100 MHz, DMSO-d<sub>6</sub>)

2-SO<sub>2</sub>Me 4-COOH

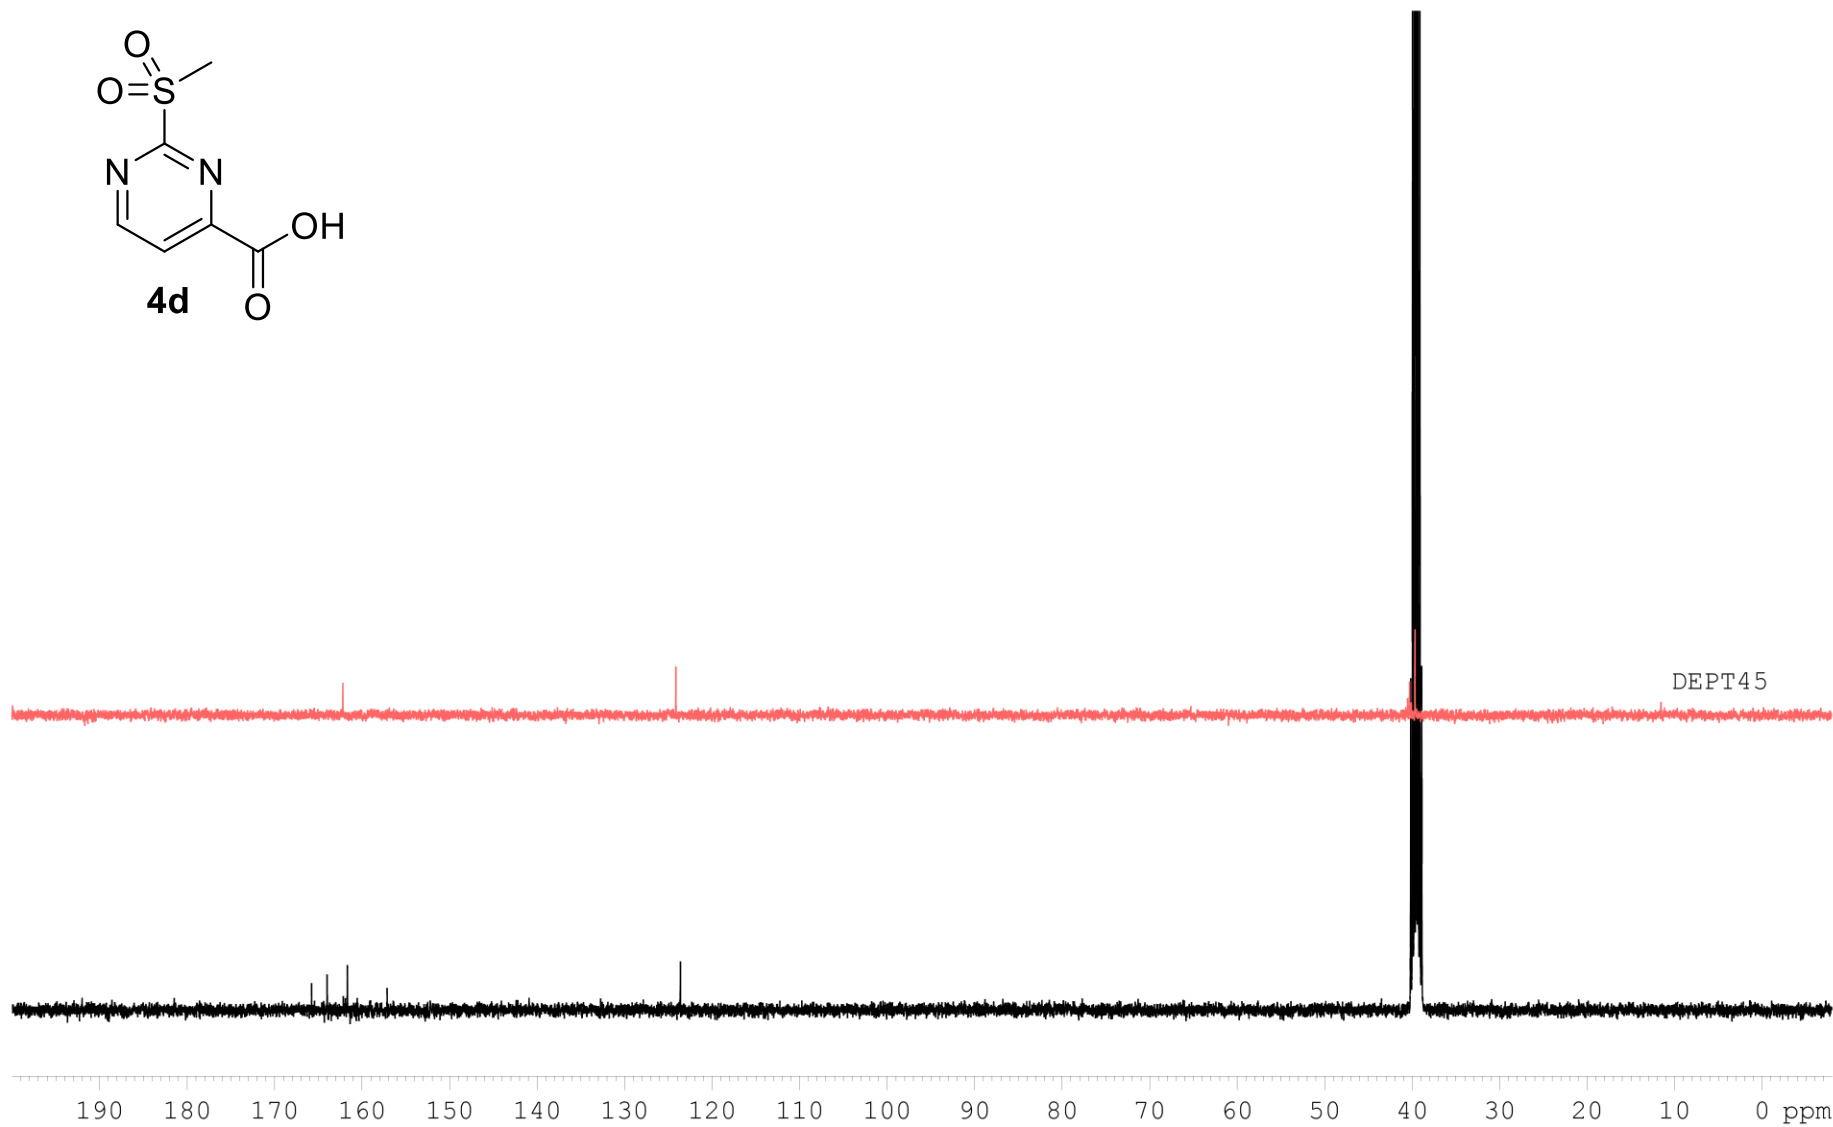

<sup>1</sup>H NMR (400 MHz, DMSO-d<sub>6</sub>)

2-SO<sub>2</sub>Me 4-Ph

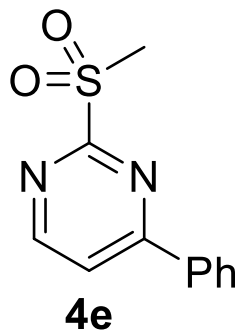

9.12  
9.11  
8.41  
8.40  
8.32  
8.32  
8.30  
8.29  
7.66  
7.64  
7.64  
7.62  
7.60

3.50  
3.33

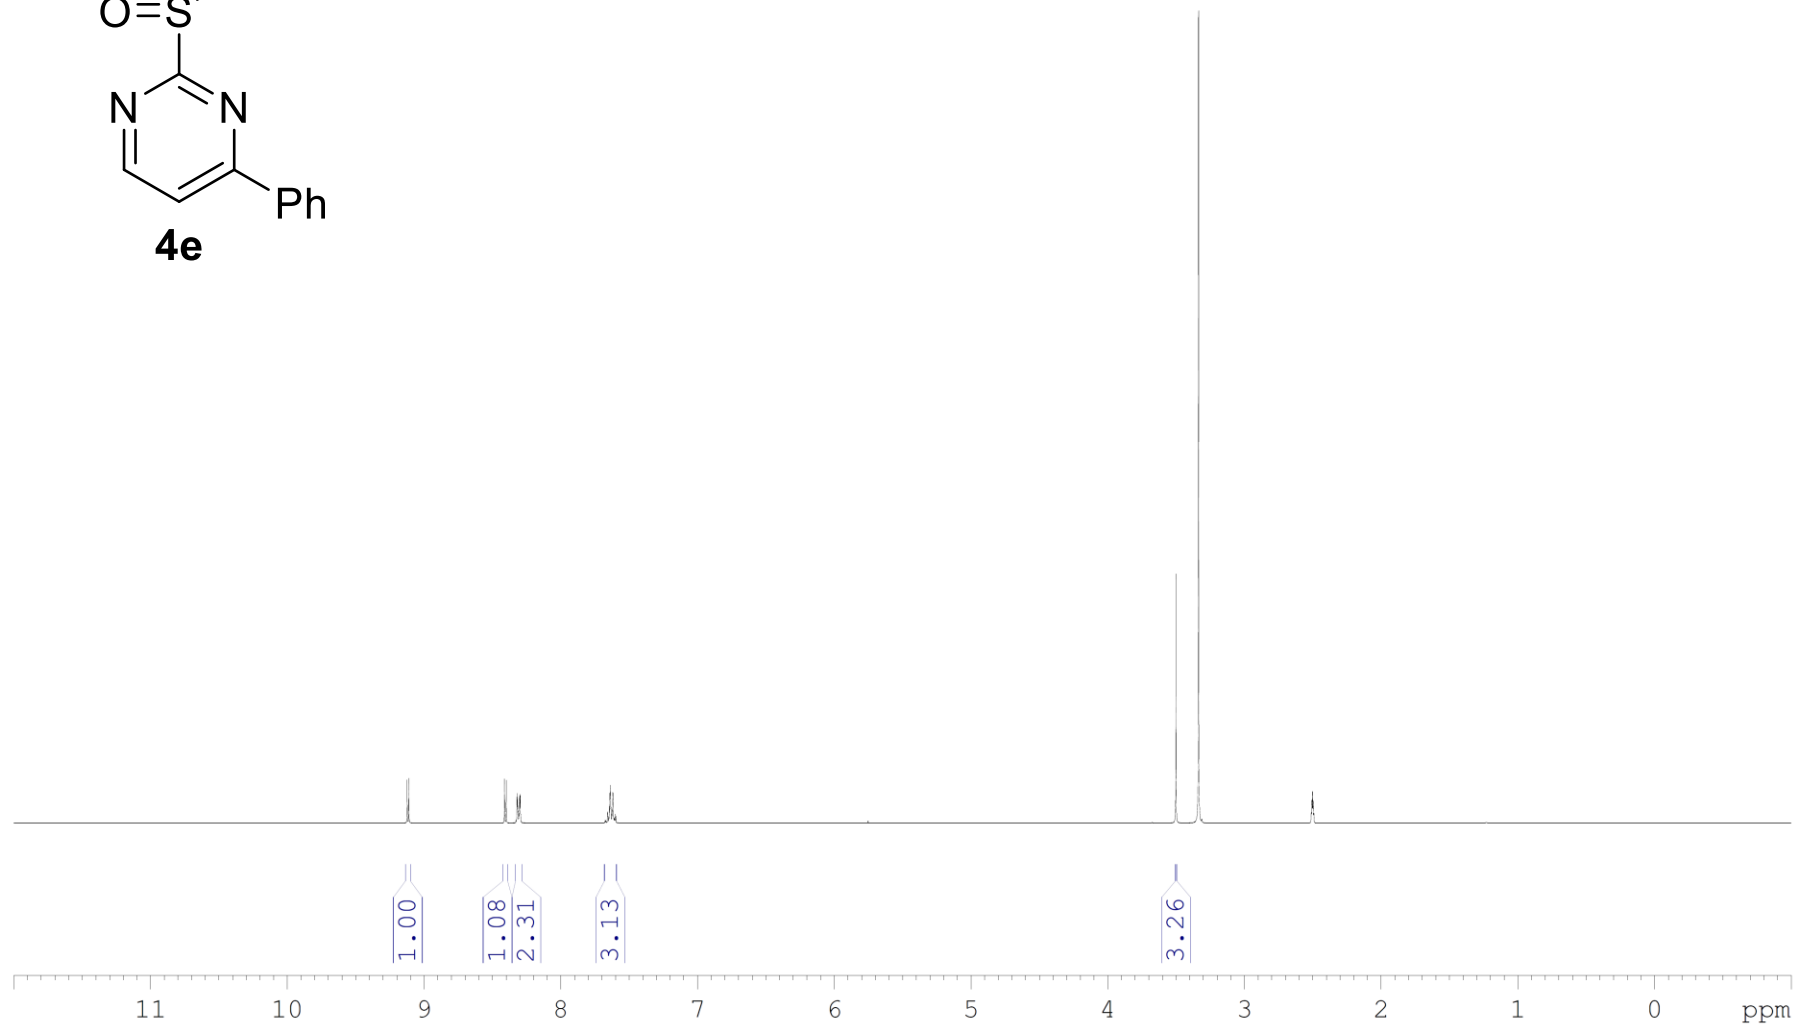



2-SO<sub>2</sub>Me 4-NH<sub>2</sub>  
1H NMR (400 MHz, DMSO-d<sub>6</sub>)

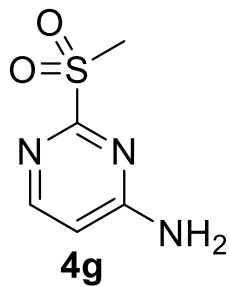

8.20  
8.18

7.64

6.60  
6.59

3.32  
3.24

2.50

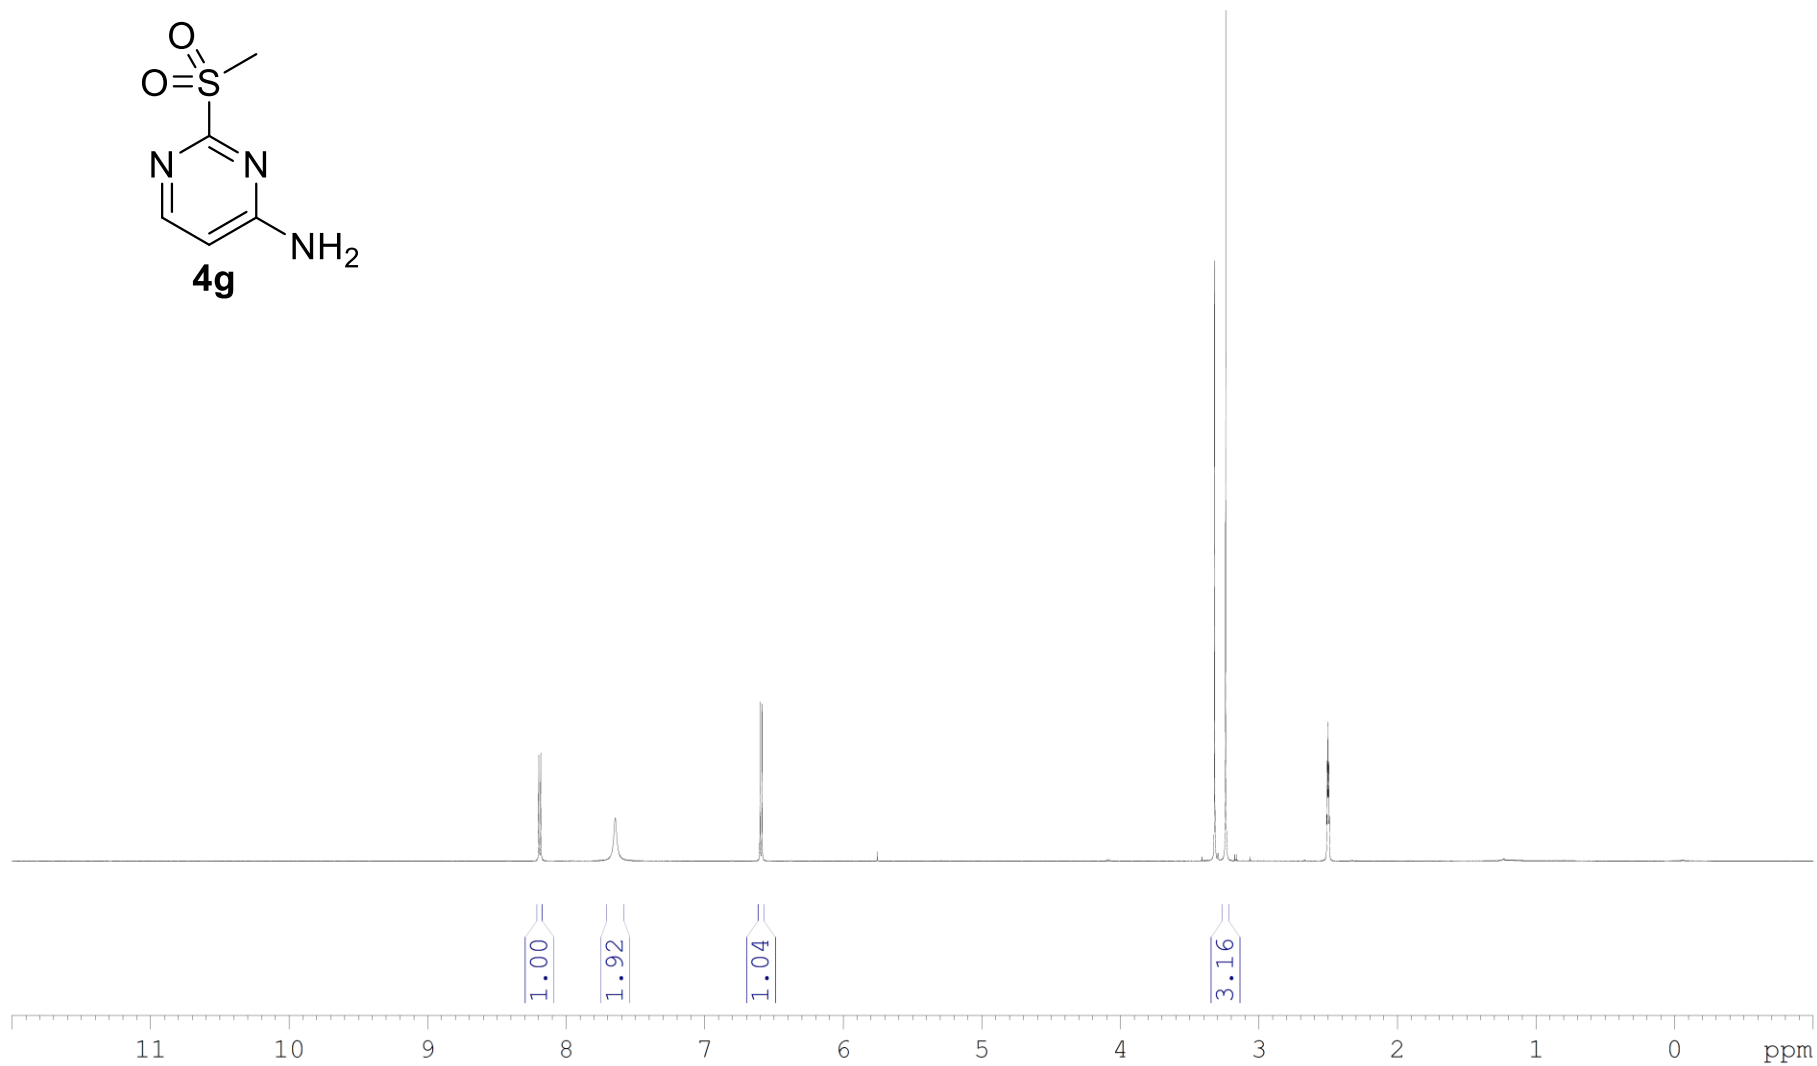

2-SO<sub>2</sub>Me 4-NH<sub>2</sub>

<sup>13</sup>C NMR (100 MHz, DMSO-d<sub>6</sub>)

165.56  
164.22

155.06

107.47

38.69

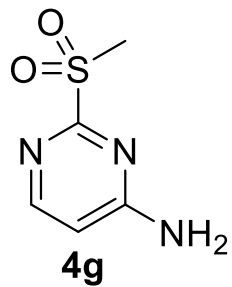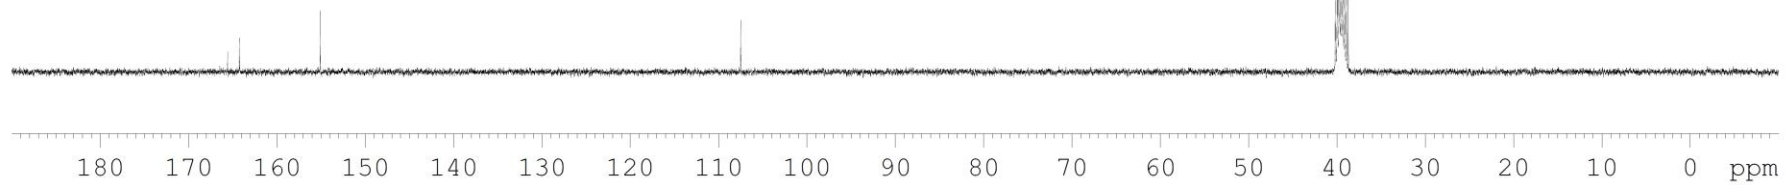

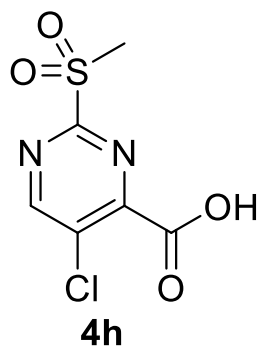

2-SO<sub>2</sub>Me 4-COOH 5-Cl  
1H NMR (400 MHz, DMSO-d<sub>6</sub>)

9.36

5.75

3.43

2.50

2.07

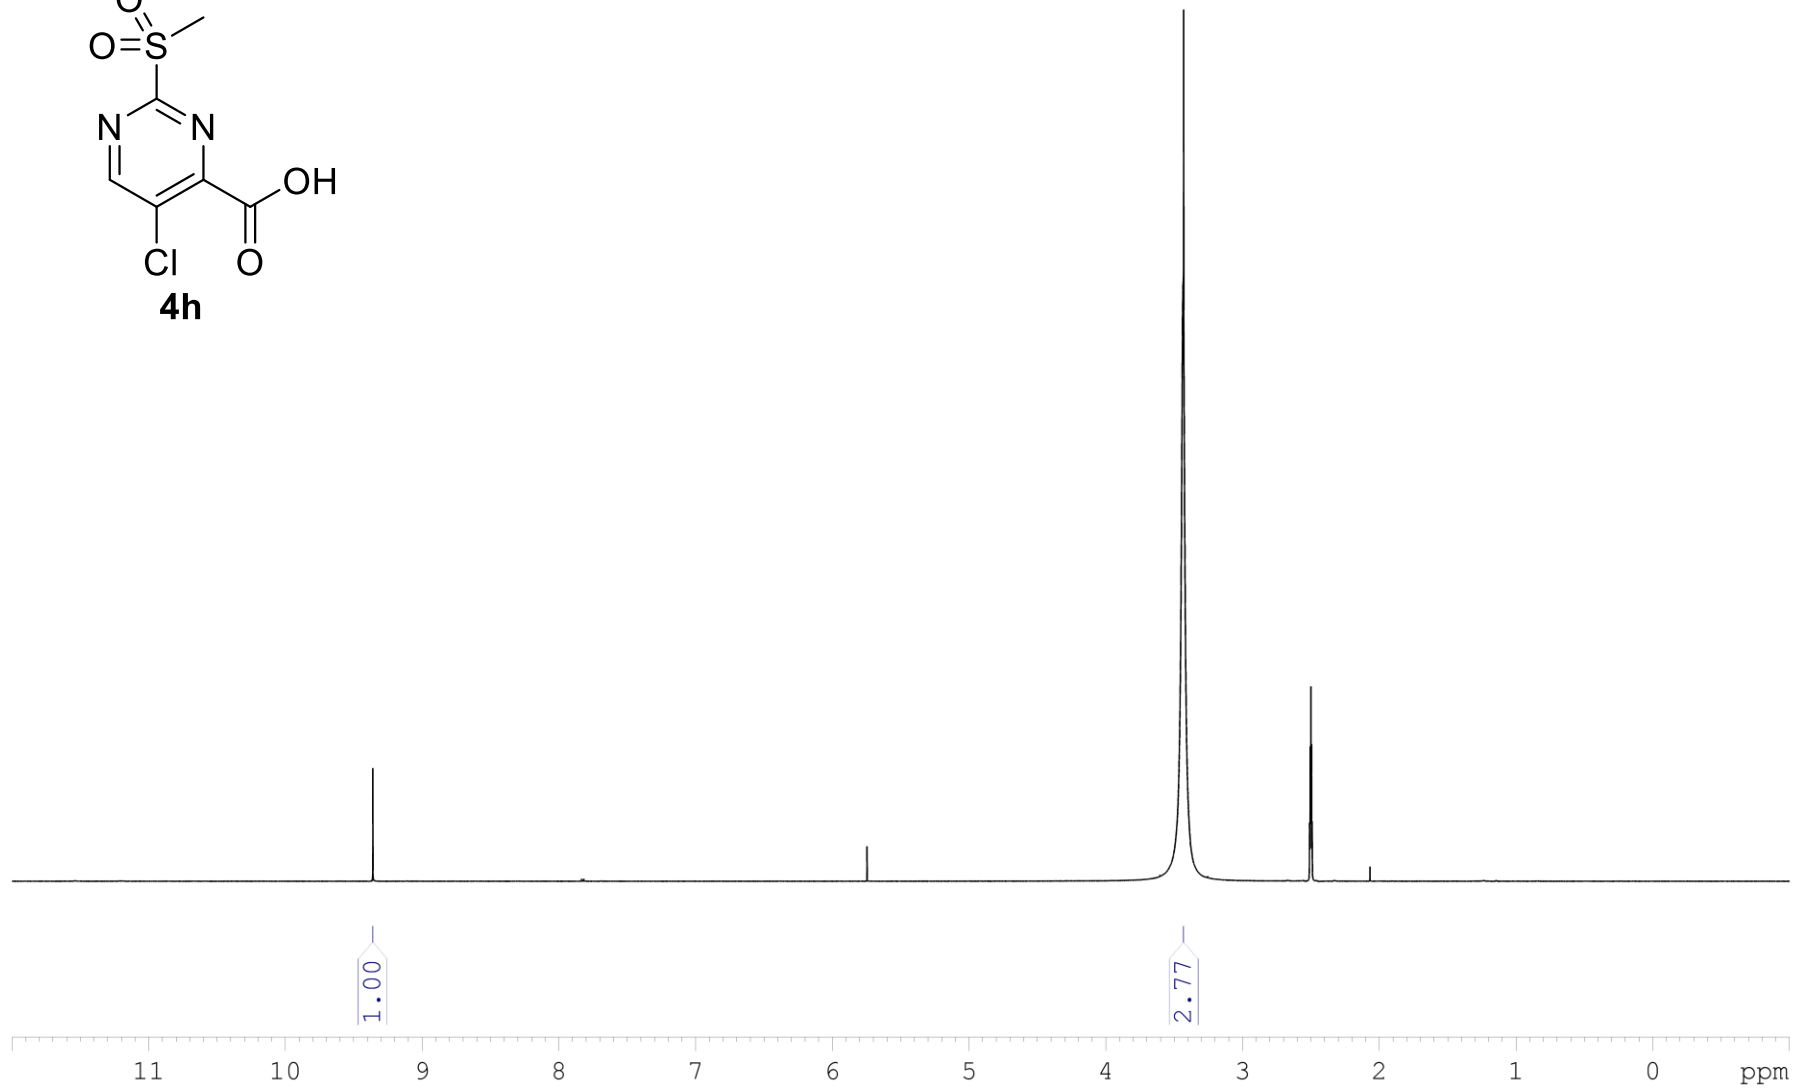

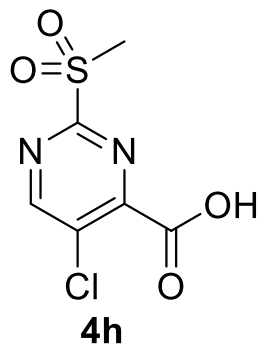

163.55  
162.90  
160.32

129.56

2-SO<sub>2</sub>Me 4-COOH 5-Cl  
13C NMR (100 MHz, DMSO-d<sub>6</sub>)

39.44

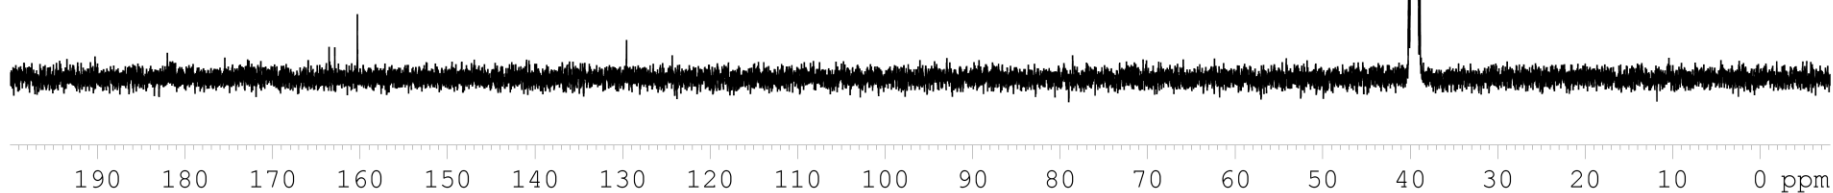

1H NMR (400 MHz, DMSO-d6)

2-SO2Me 4-C(O)NH2

9.30  
9.29

8.52  
8.25  
8.24  
8.18

3.57  
3.34

2.50

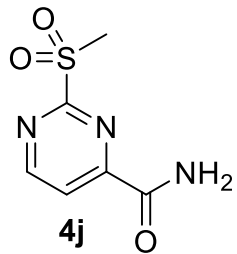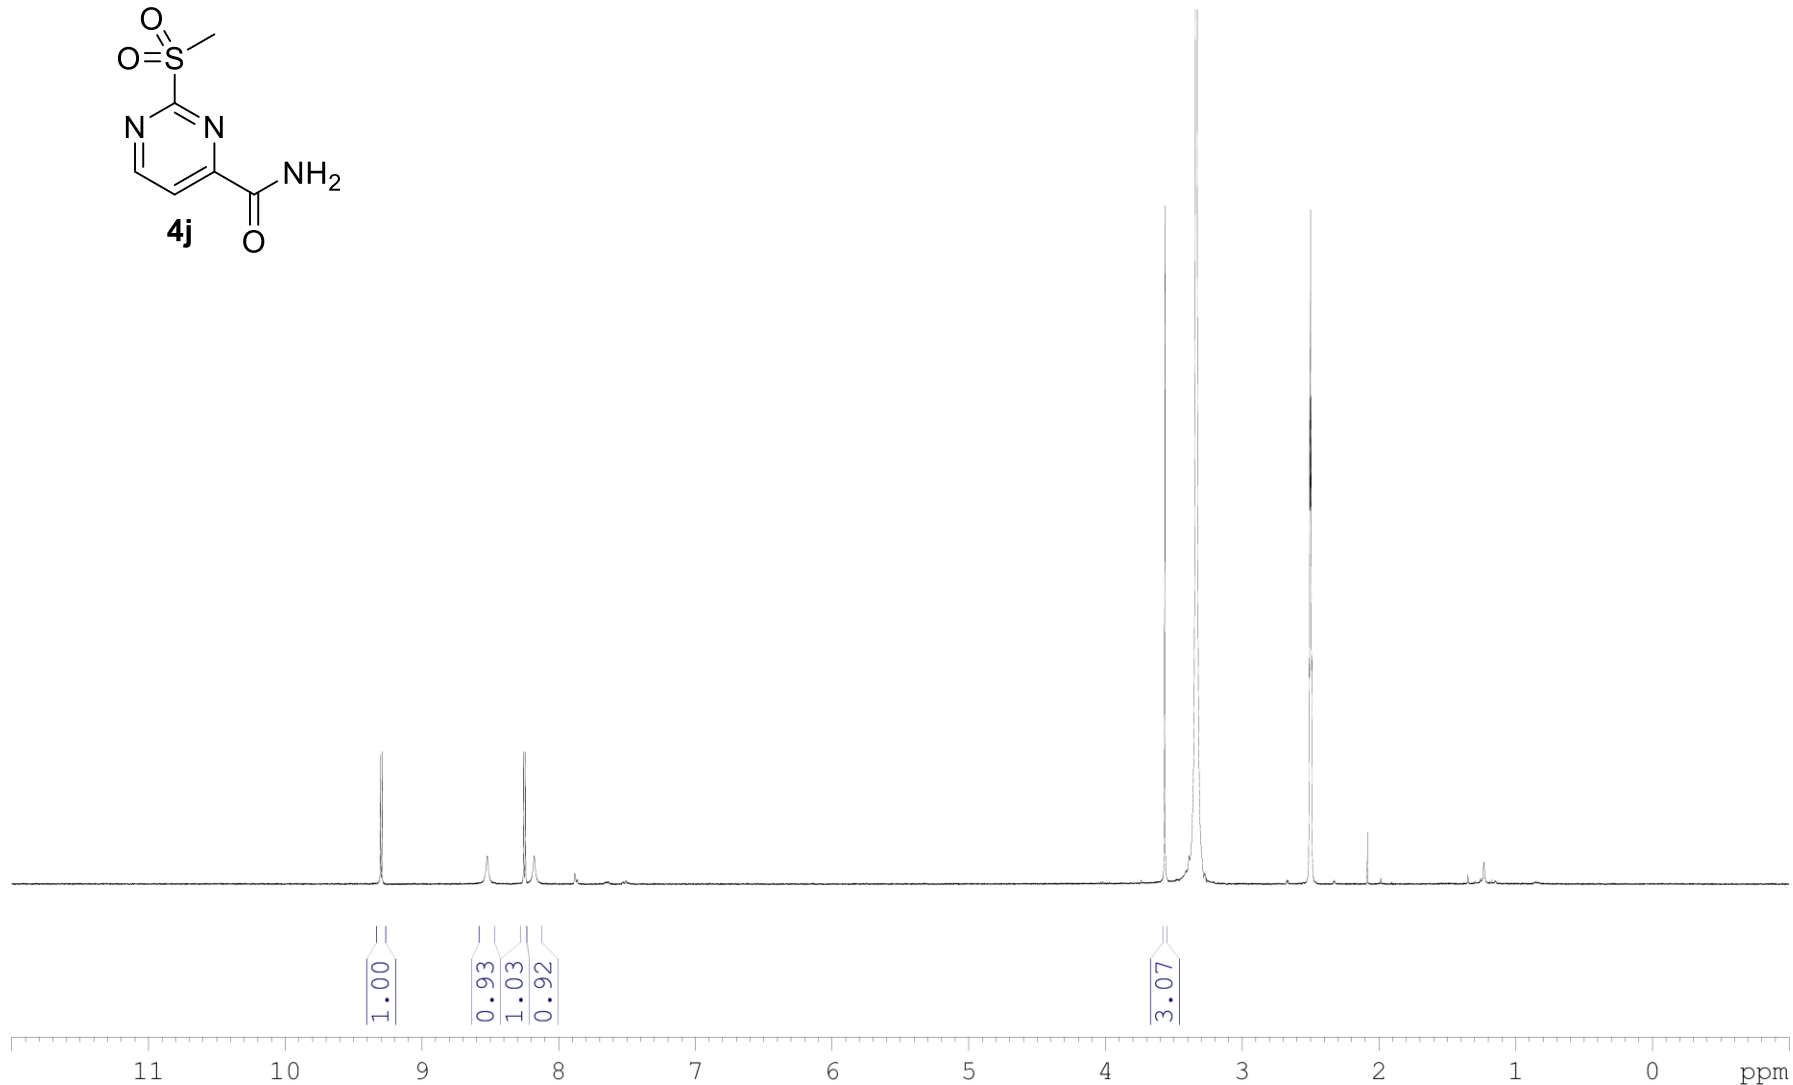



165.00  
163.30  
161.68  
158.29

121.29

13C NMR (100 MHz, DMSO-d6)  
2-SO2Me 4-C(O)NH2

38.93

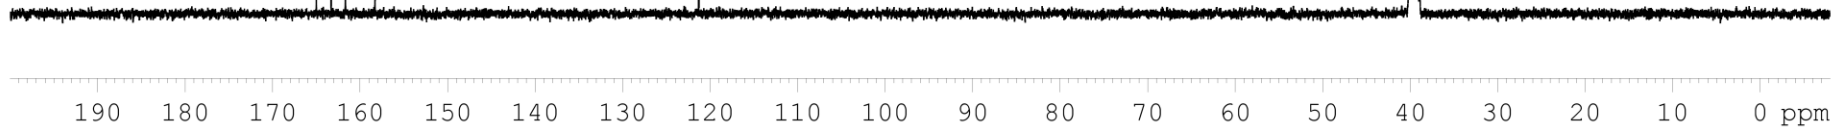

2-SO<sub>2</sub>Me 4-COOMe

9.36  
9.35

8.31  
8.30

<sup>1</sup>H NMR (400 MHz, DMSO-d<sub>6</sub>)

3.97

3.32

2.50

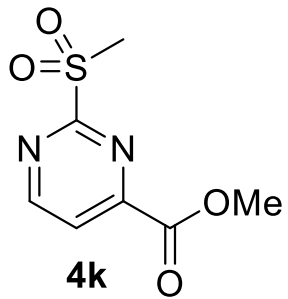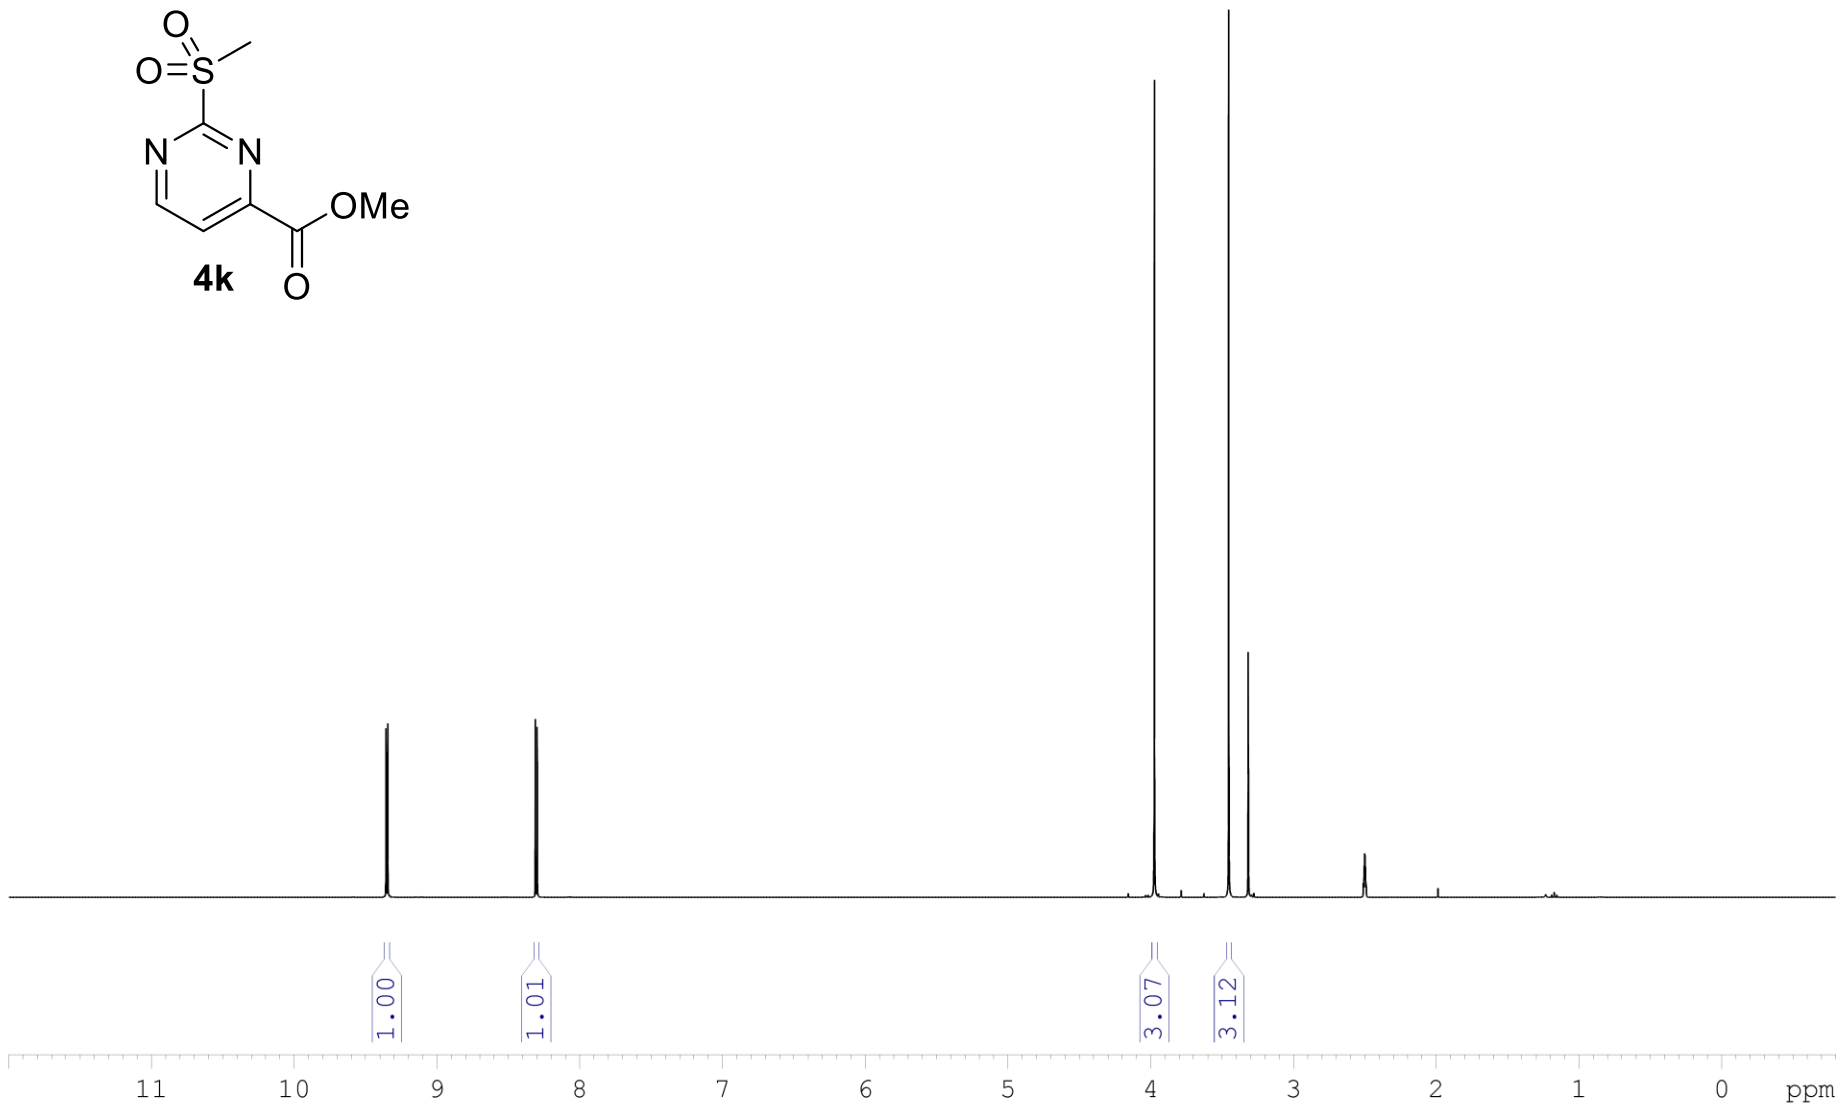

2-SO<sub>2</sub>Me 4-CO<sub>2</sub>Me

165.73  
163.01  
161.83  
155.80

123.70

<sup>13</sup>C NMR (100 MHz, DMSO-d<sub>6</sub>)

53.44

39.17

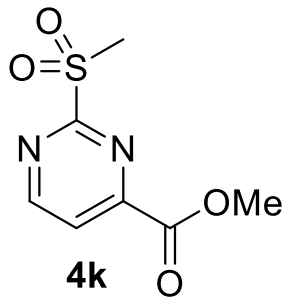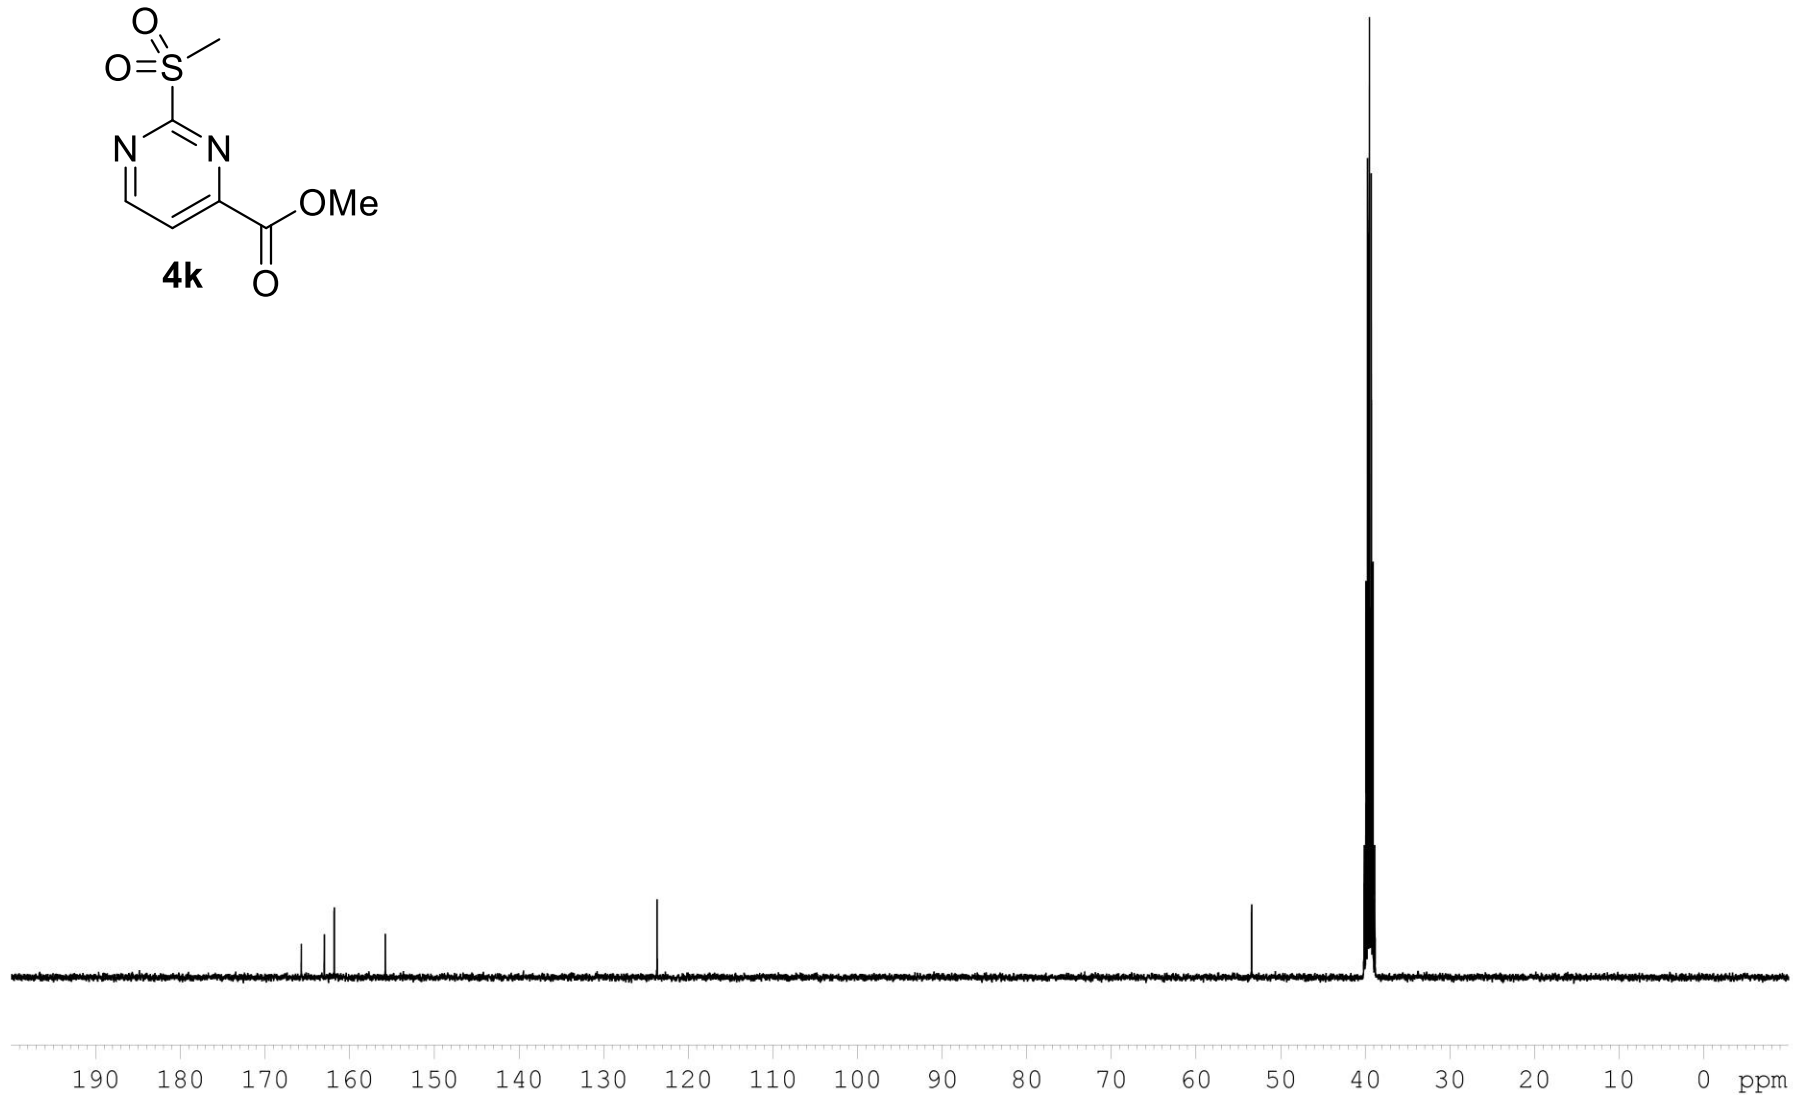



2-SO<sub>2</sub>Me 4-CF<sub>3</sub>

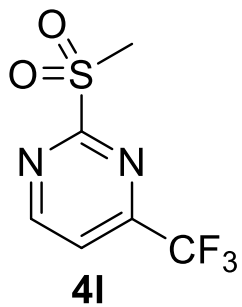

<sup>1</sup>H NMR (400 MHz, DMSO-d<sub>6</sub>)

9.48  
9.47

8.40  
8.39

3.48  
3.35

2.50

1.00

1.02

3.16

11 10 9 8 7 6 5 4 3 2 1 0 ppm

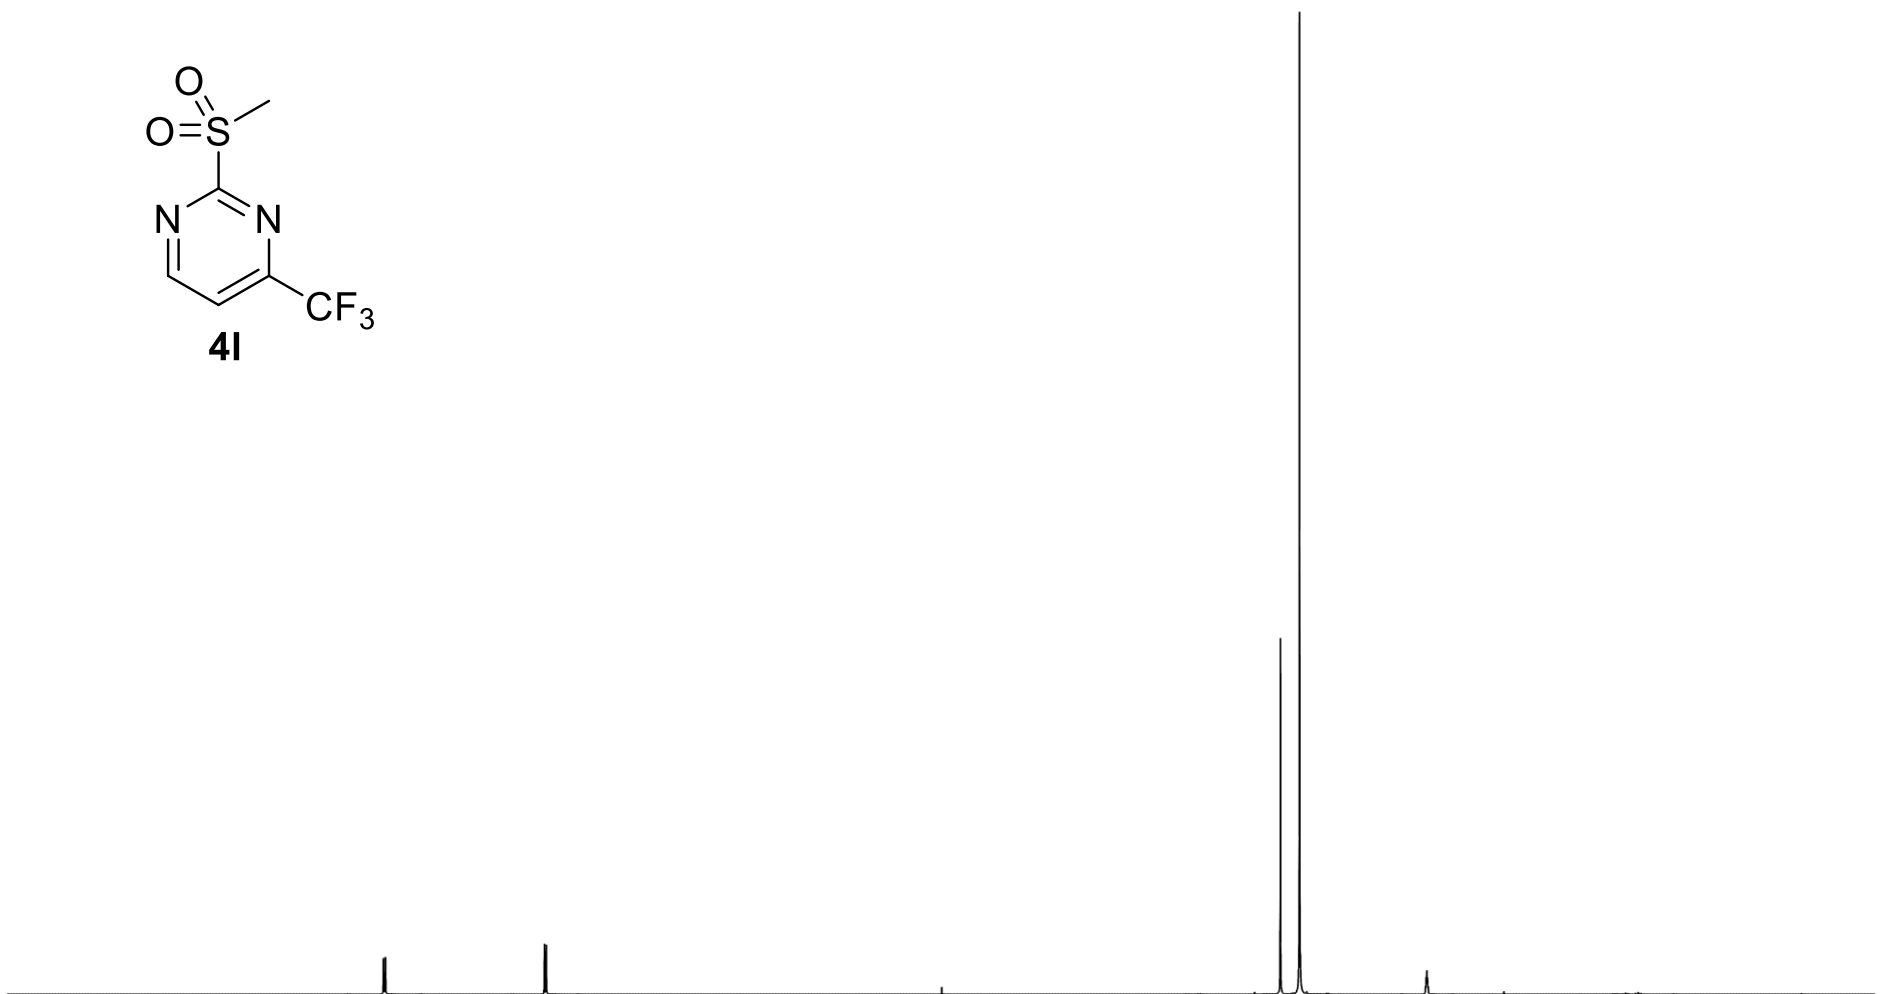

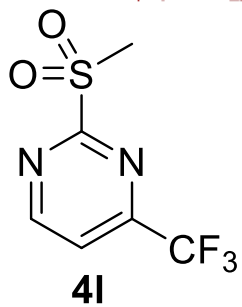

165.723  
162.997  
155.449  
155.077  
154.711  
154.348

121.379  
120.919  
120.887  
120.862  
120.839  
118.642

2-SO<sub>2</sub>Me 4-CF<sub>3</sub>  
13C (100MHz, DMSO-D<sub>6</sub>)

39.135

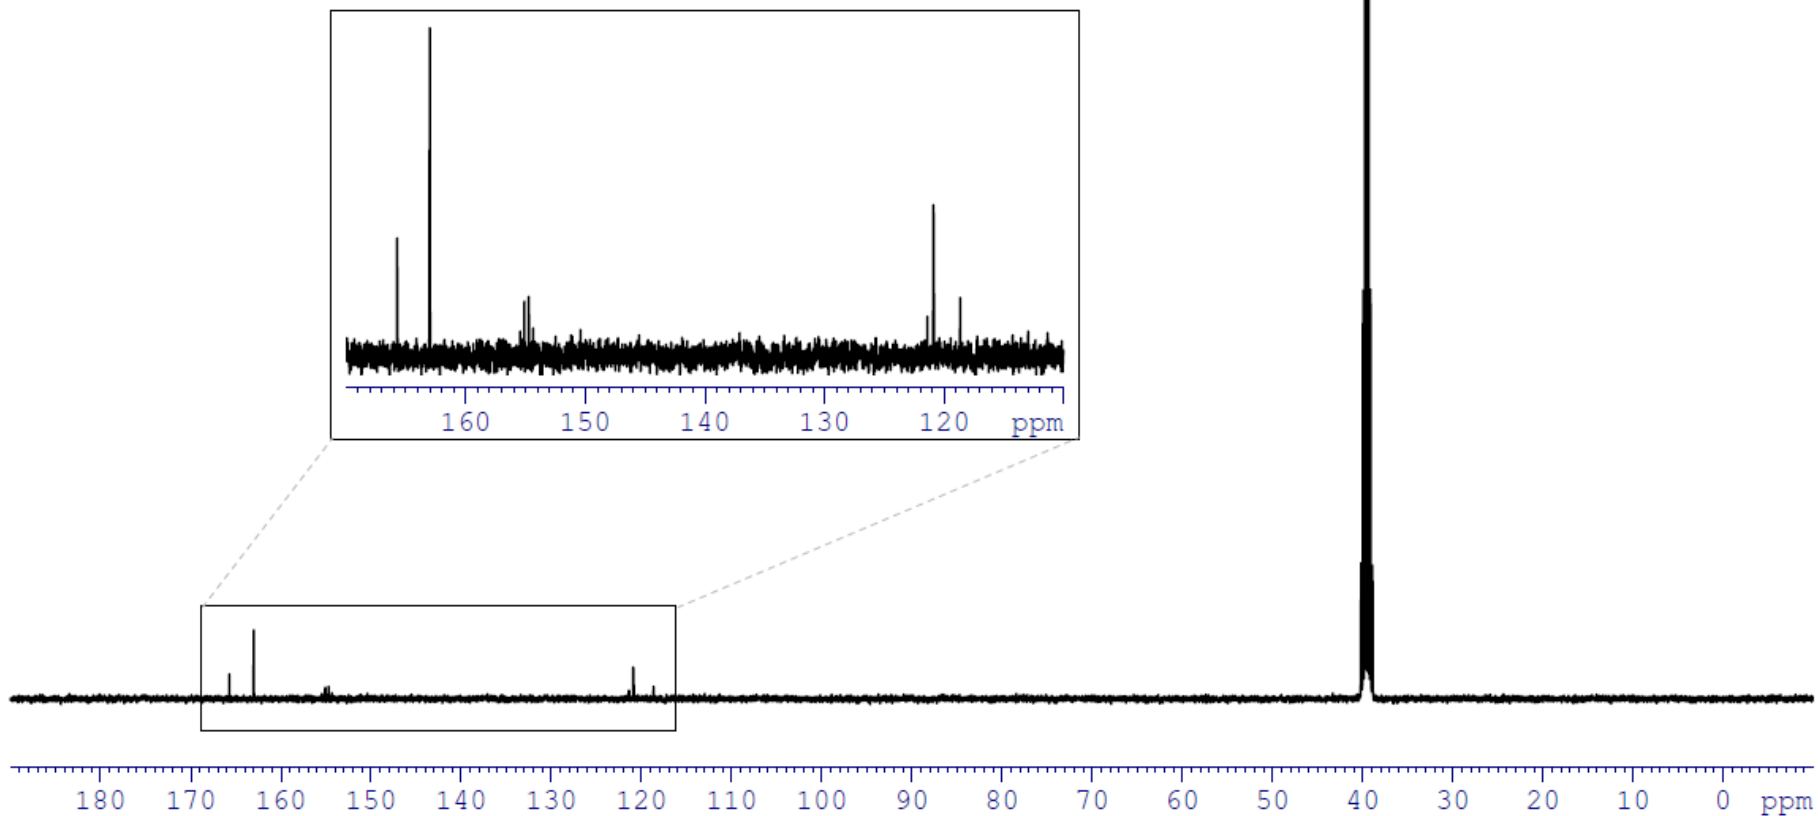

2-SO<sub>2</sub>Me 4-CF<sub>3</sub>

<sup>19</sup>F NMR (376 MHz, DMSO-d<sub>6</sub>)

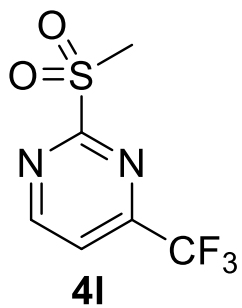

— -68.59

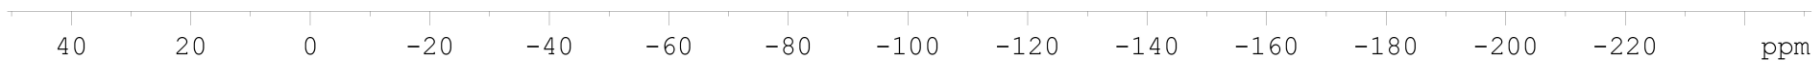

2-SO<sub>2</sub>Me 5-NH<sub>2</sub>  
1H NMR (400 MHz, DMSO-d<sub>6</sub>)

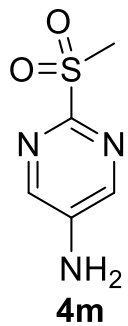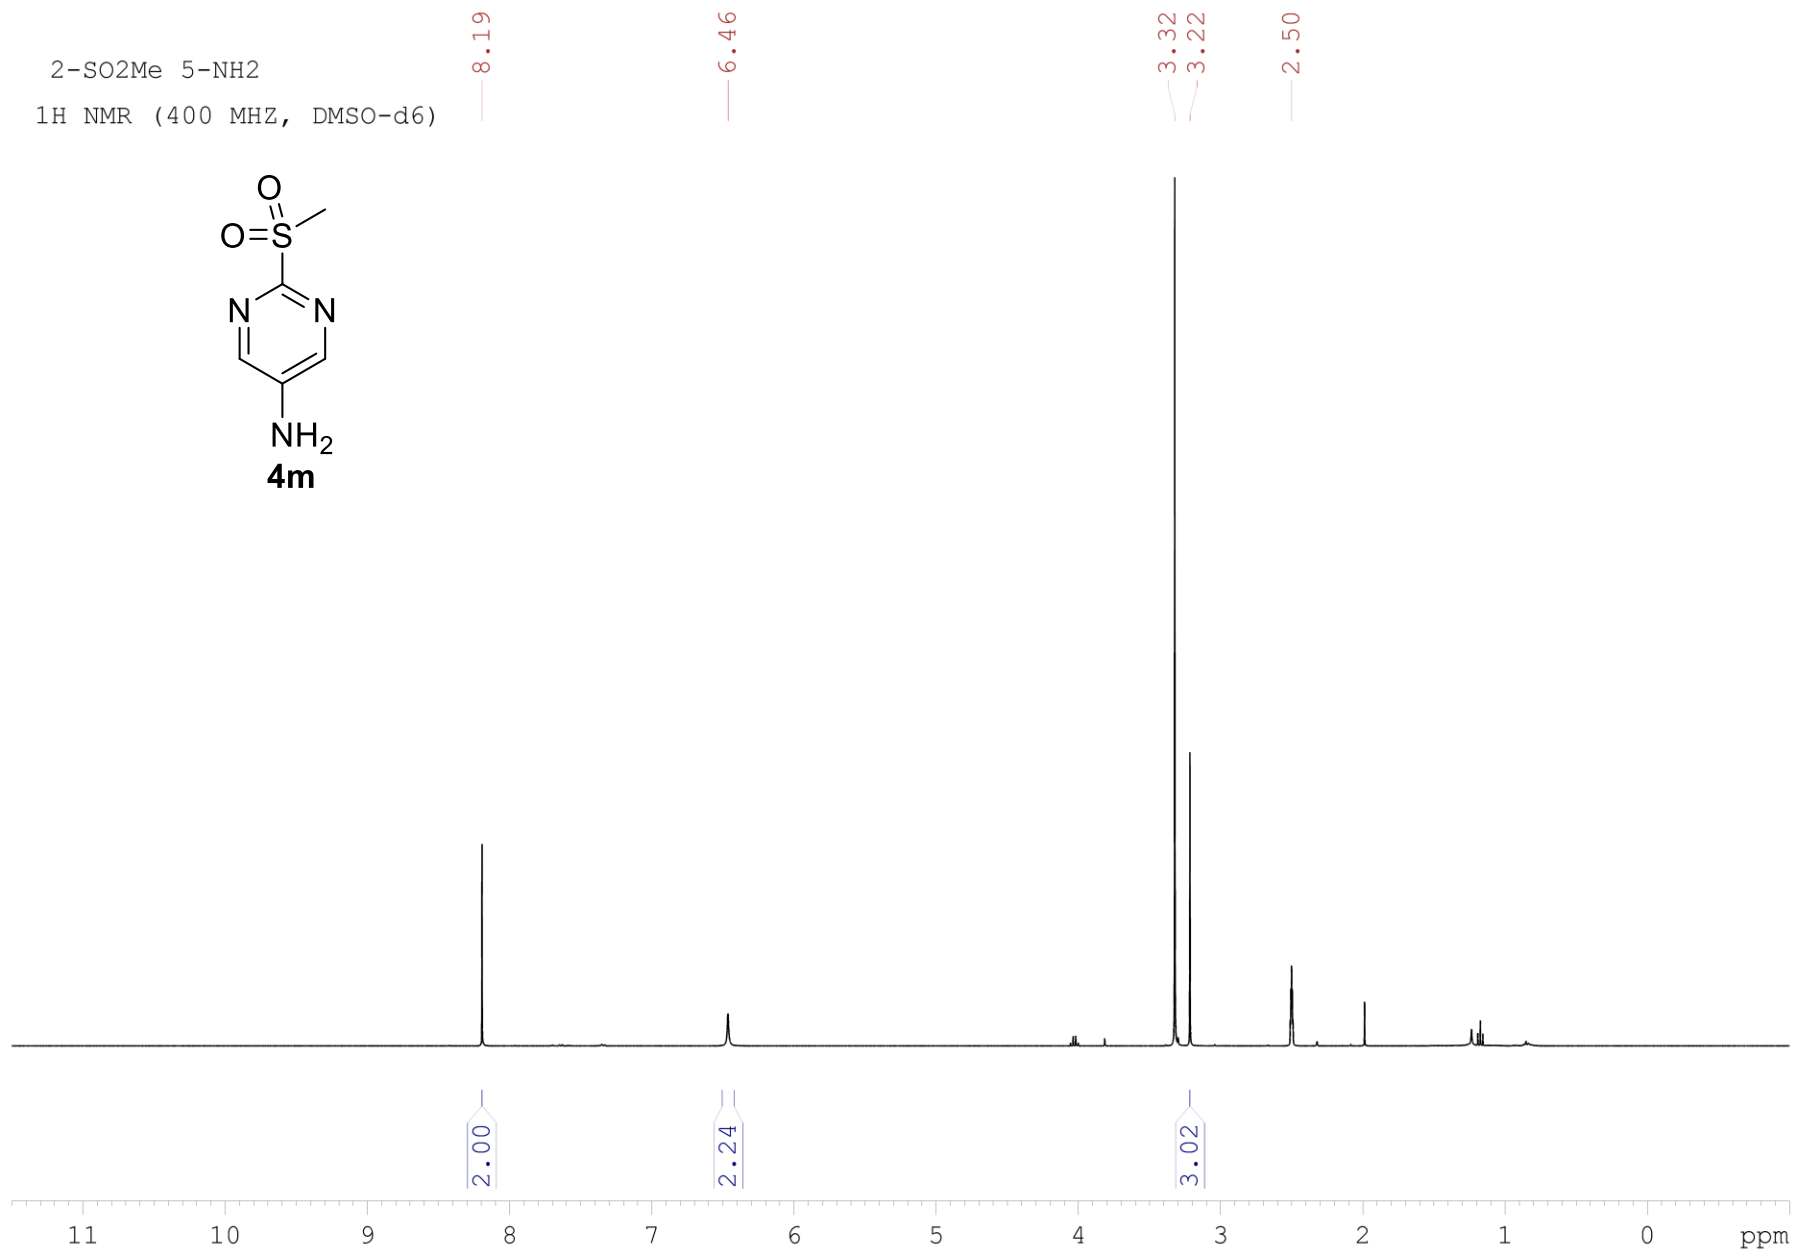

2-SO<sub>2</sub>Me 5-NH<sub>2</sub>

— 152.76  
— 144.99  
— 140.85

<sup>13</sup>C NMR (100 MHz, DMSO-d<sub>6</sub>)

— 39.9

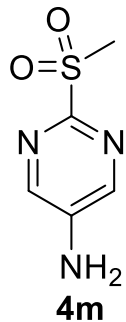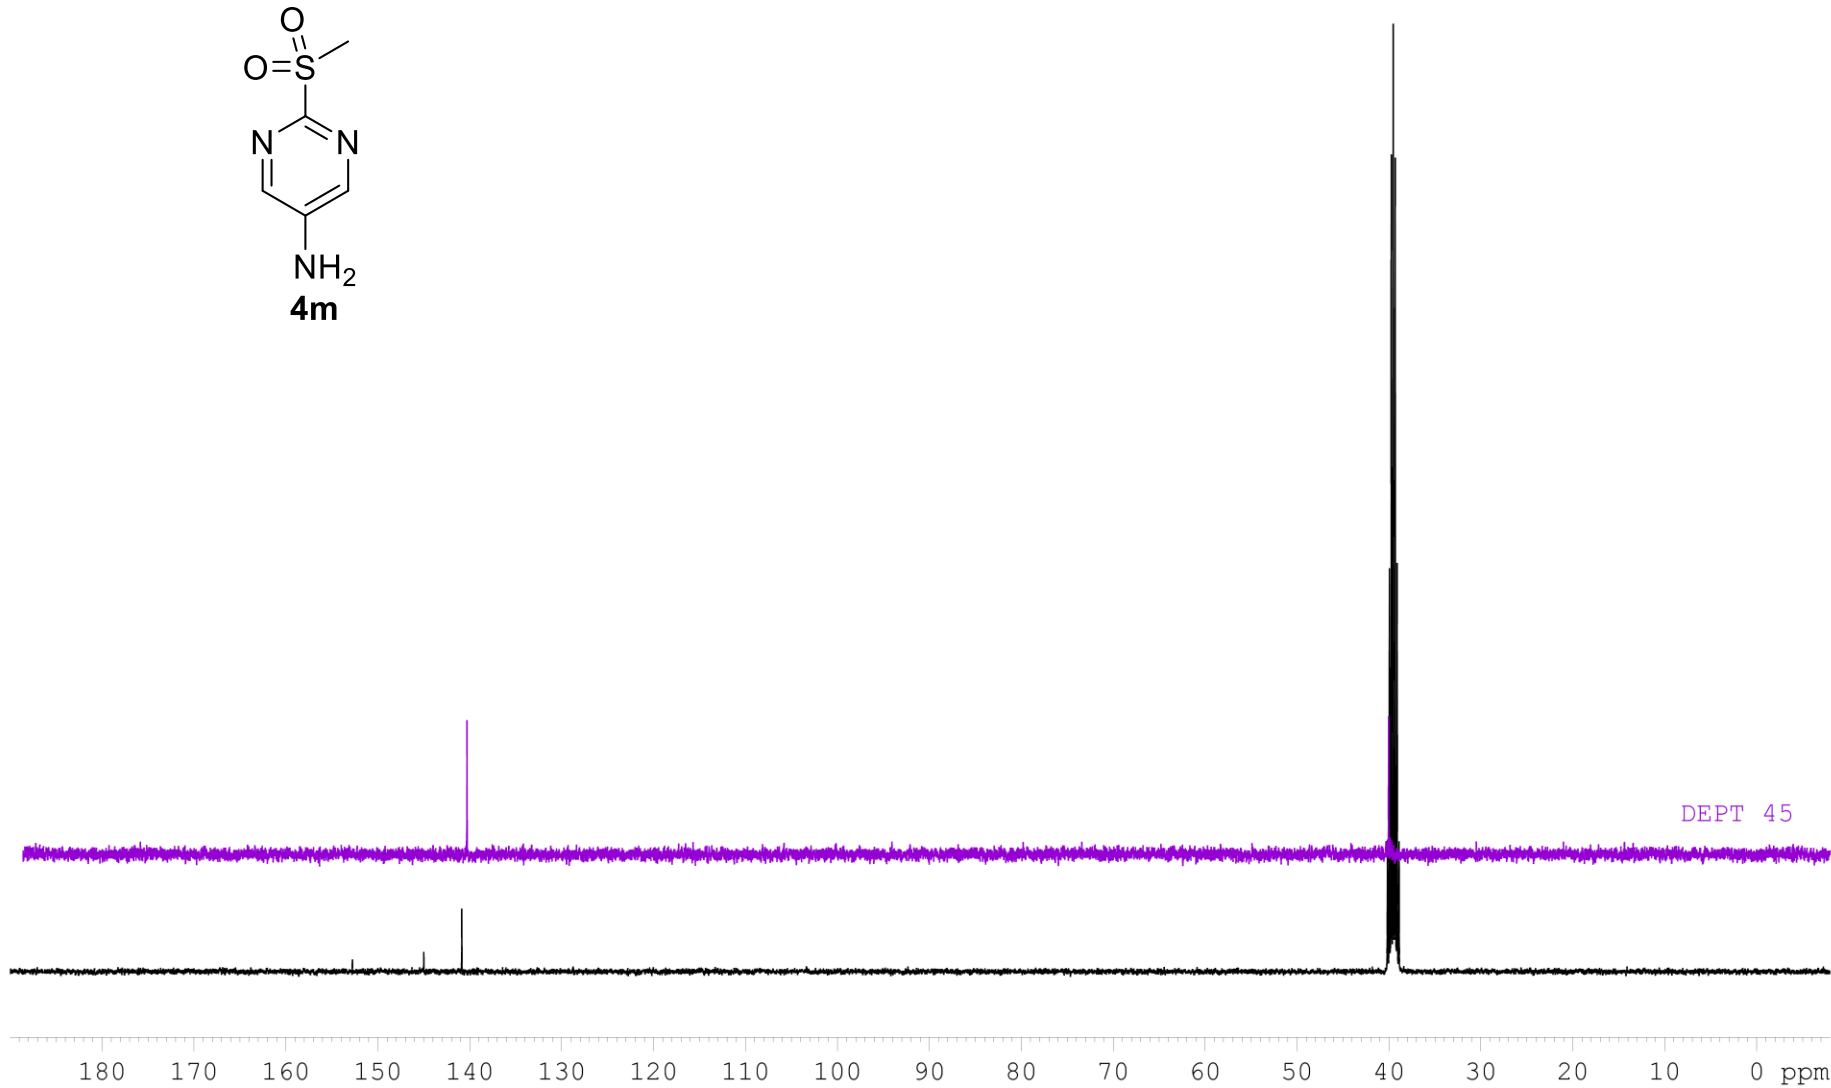

DEPT 45

2-SO<sub>2</sub>Me 5-Me

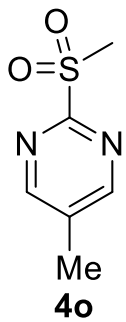

<sup>1</sup>H NMR (400 MHz, DMSO-d<sub>6</sub>)

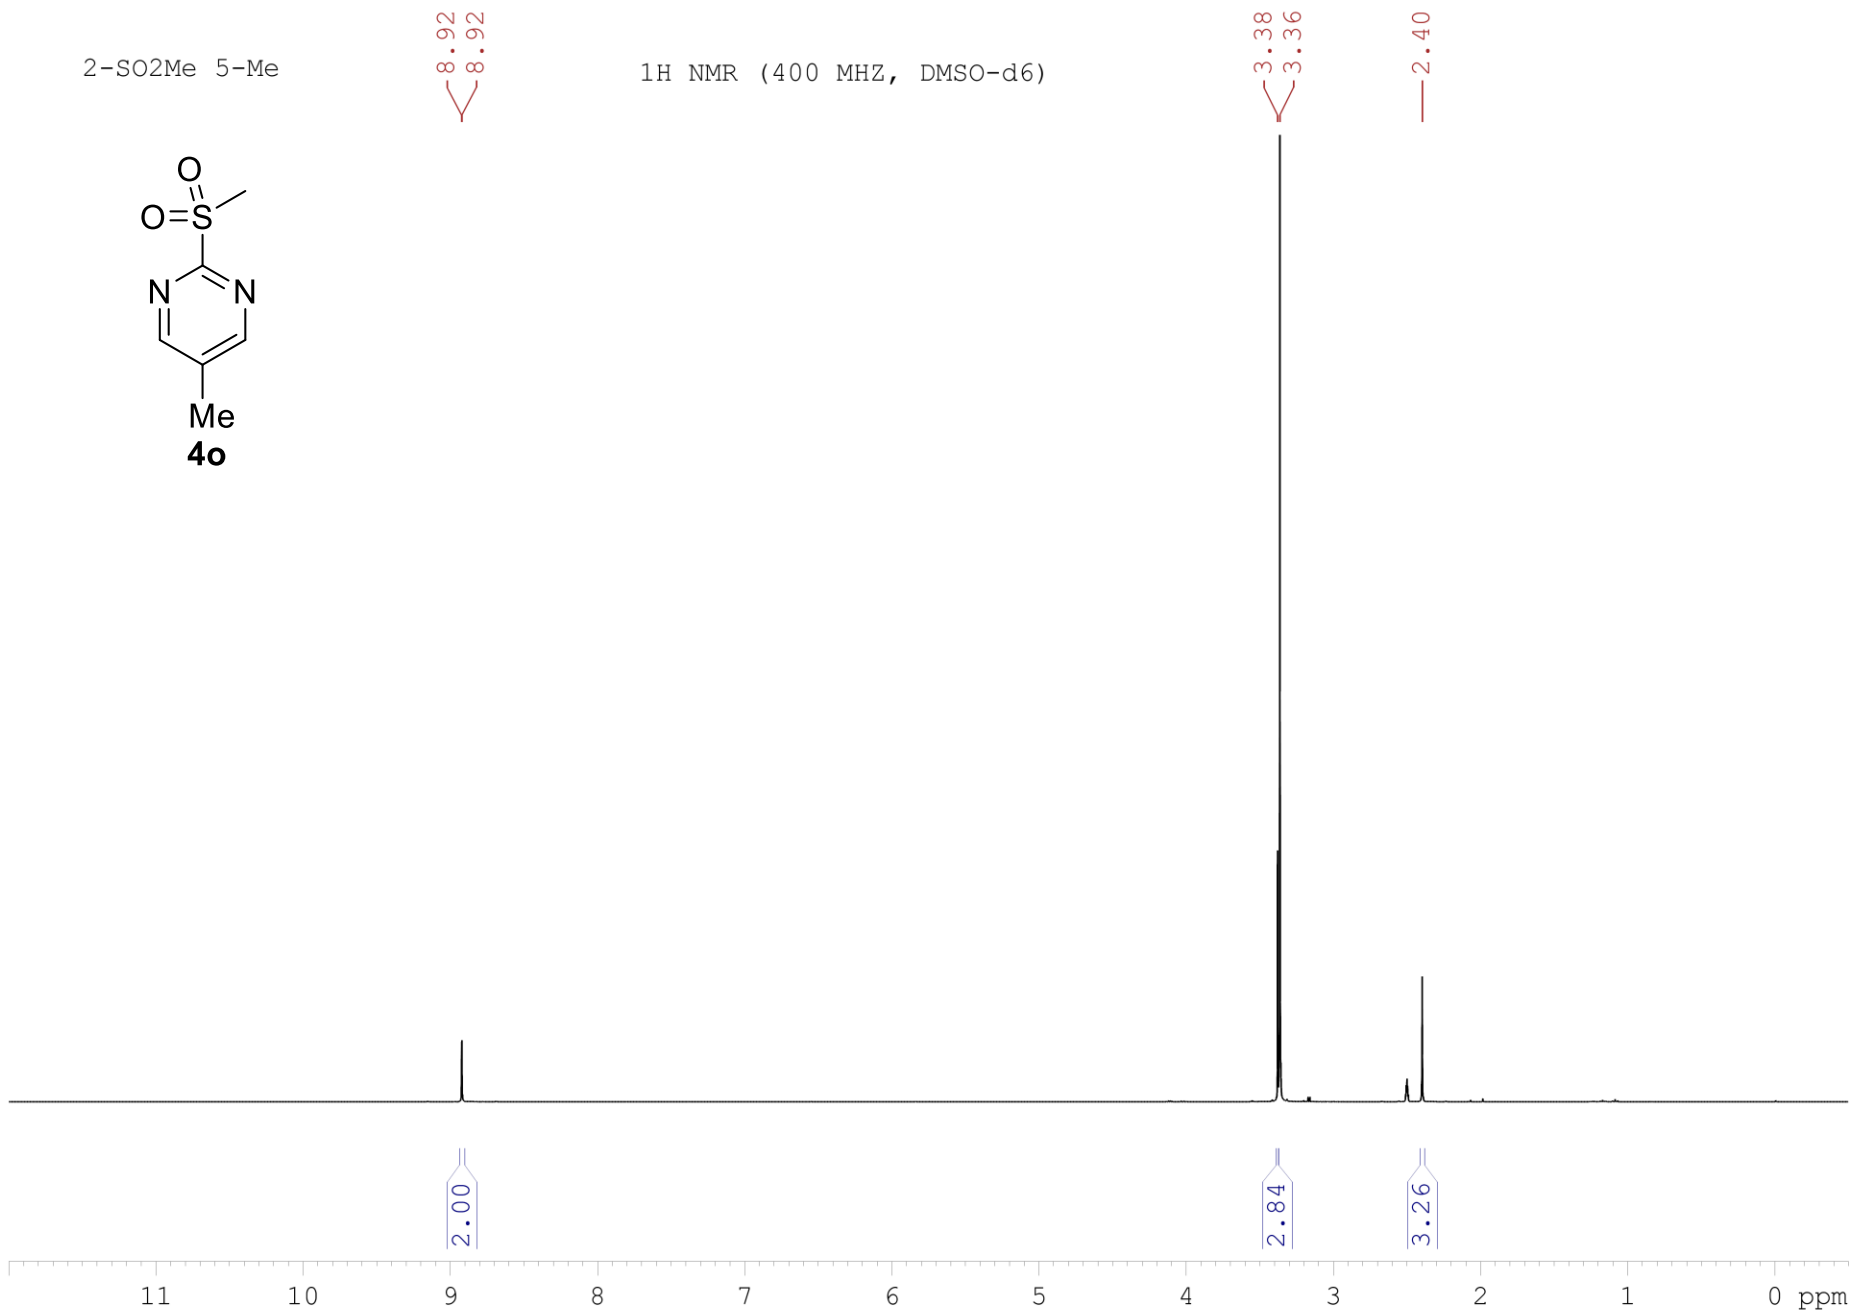

2-SO<sub>2</sub>Me 5-Me

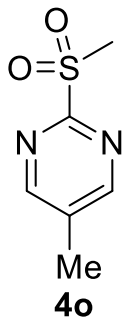

<sup>13</sup>C NMR (100 MHz, DMSO-d<sub>6</sub>)

— 163.33

— 158.66

— 134.88

— 39.23

— 15.26

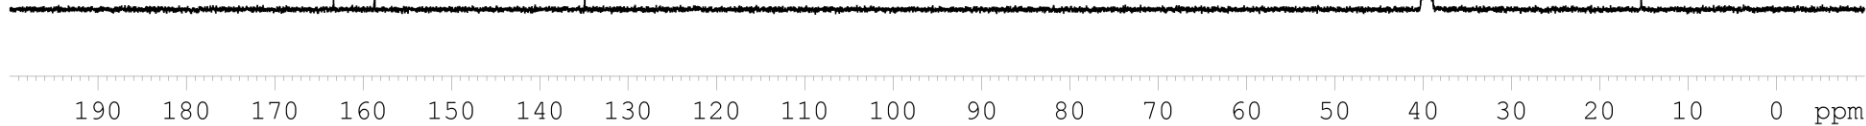

2-SO<sub>2</sub>Me 5-Ph

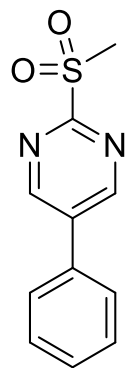

**4p**

9.42

7.92  
7.91  
7.90  
7.60  
7.58  
7.57

1H NMR (400 MHz, DMSO-d<sub>6</sub>)

3.45  
3.33

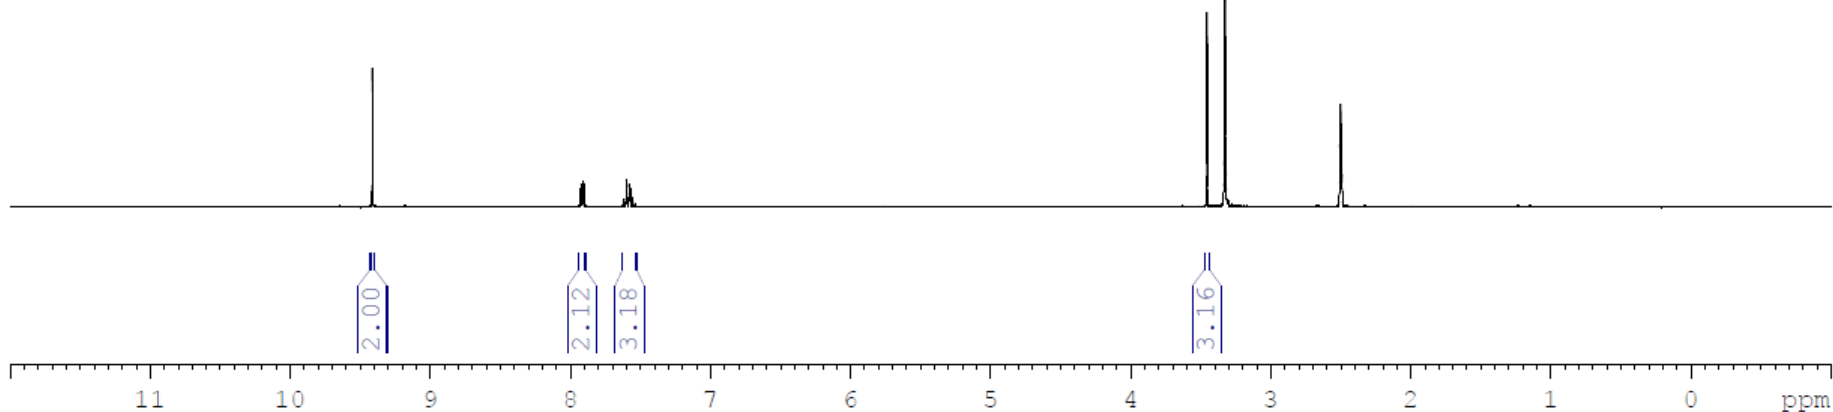



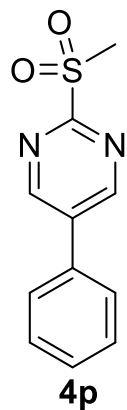

— 164.17

— 156.43

— 135.53

— 132.46

— 129.84

— 129.44

— 127.58

2-SO<sub>2</sub>Me 5-Ph

<sup>13</sup>C NMR (100 MHz, DMSO-d<sub>6</sub>)

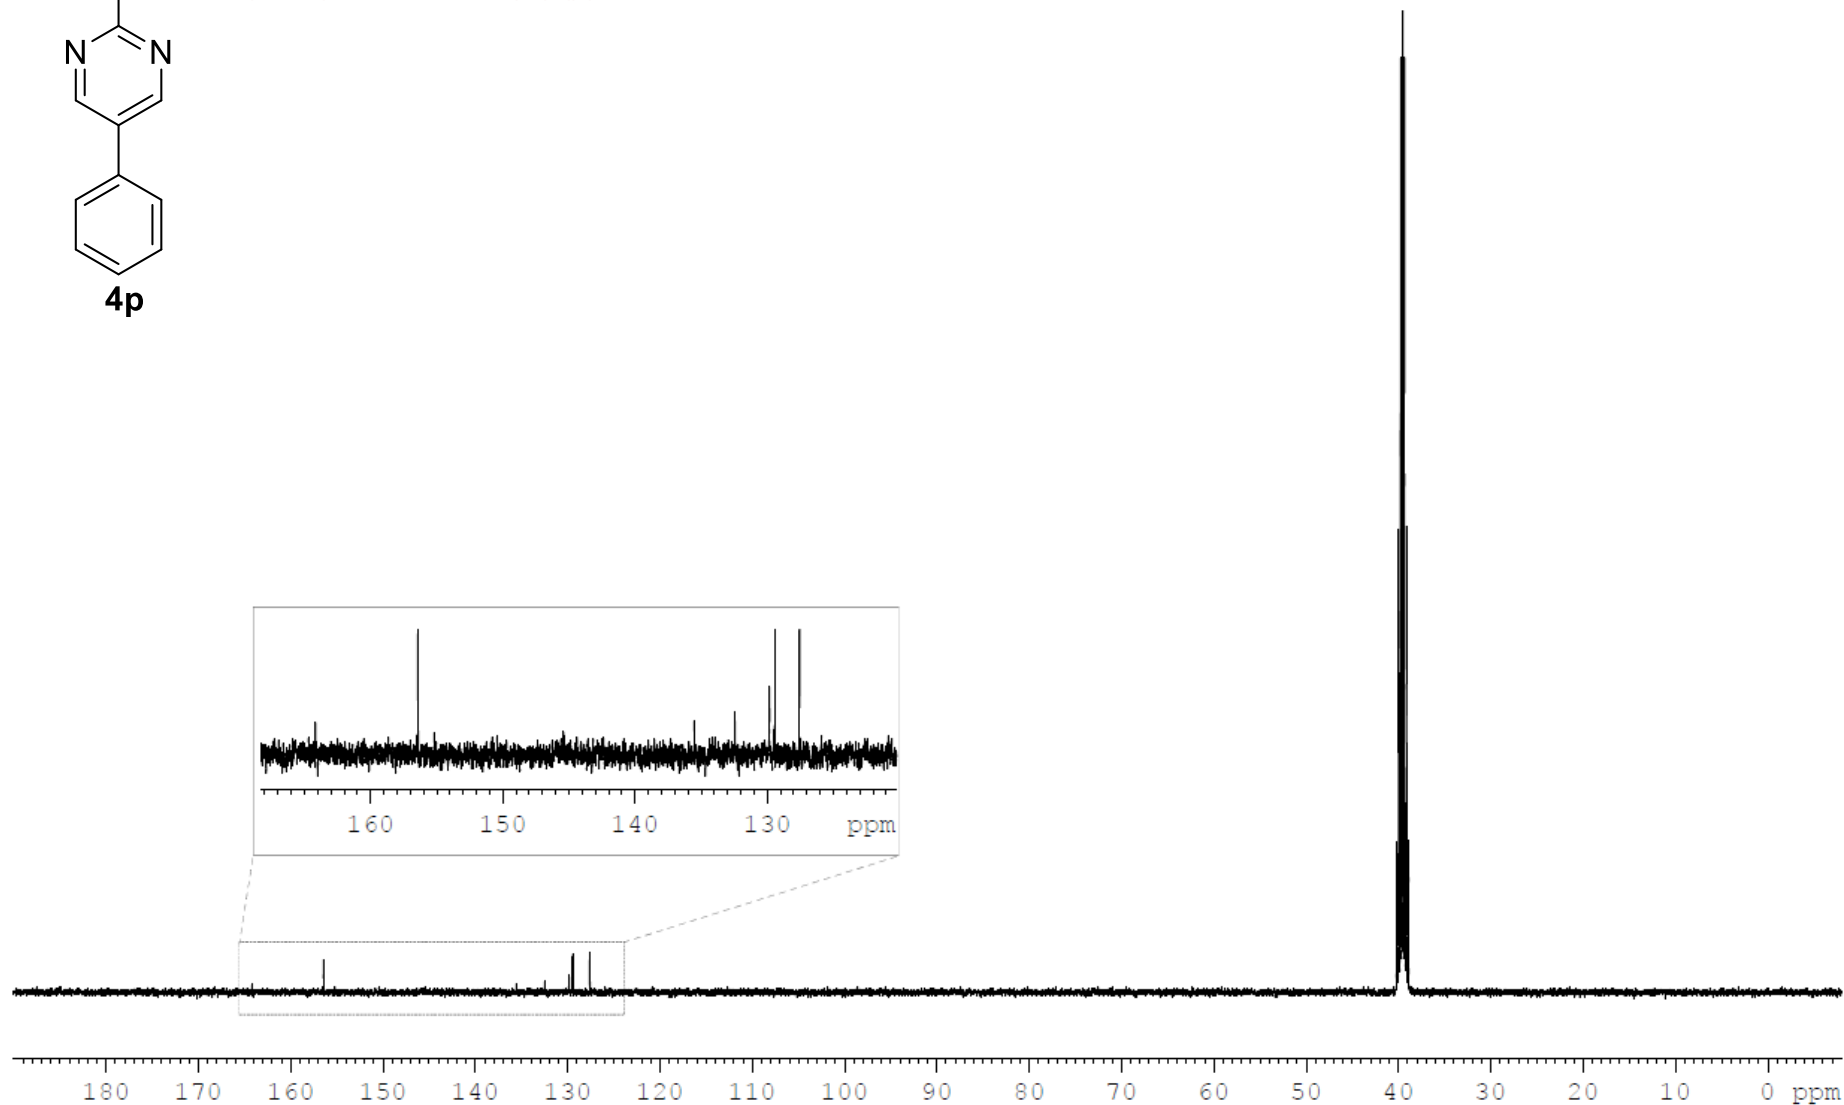

2-SO<sub>2</sub>Me 5-F

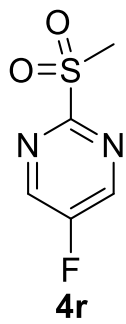

<sup>1</sup>H NMR (400 MHz, DMSO-d<sub>6</sub>)

9.19  
9.19

3.43  
3.31

2.50

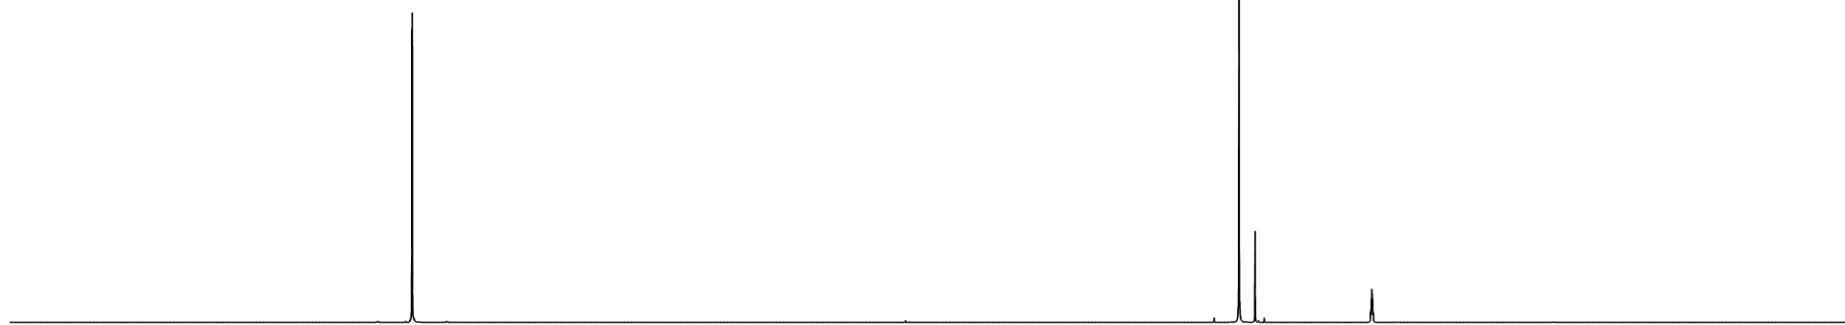

2.00

3.07

11 10 9 8 7 6 5 4 3 2 1 0 ppm

2-SO<sub>2</sub>Me 5-F

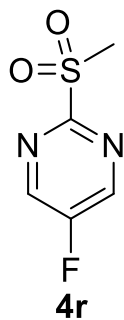

161.14  
161.09  
159.61  
156.94  
147.25  
147.03

<sup>13</sup>C NMR (100 MHz, DMSO-d<sub>6</sub>)

39.7

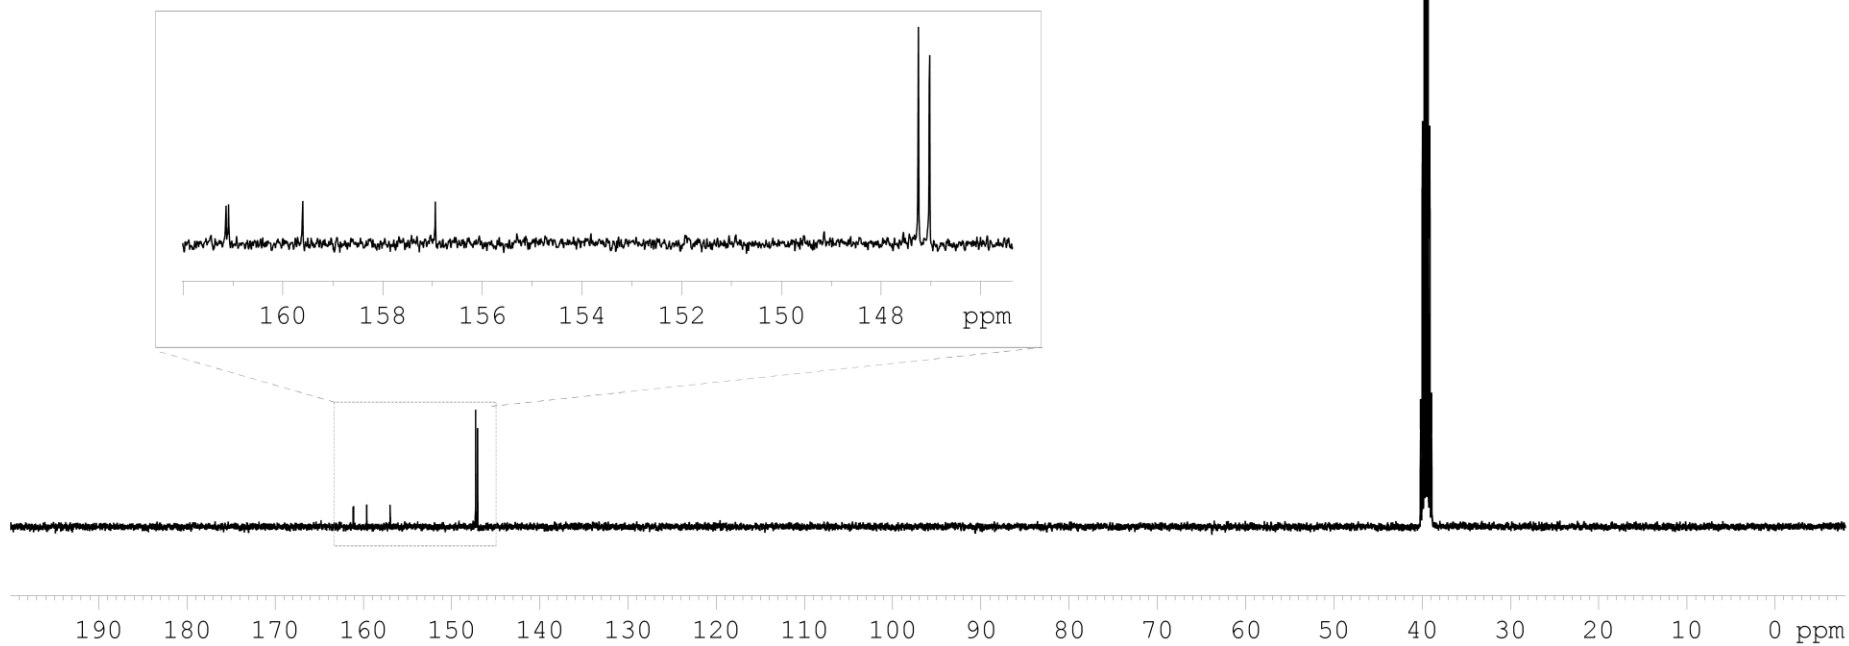

2-SO<sub>2</sub>Me 5-F

<sup>19</sup>F NMR (376 MHz, DMSO-d<sub>6</sub>)

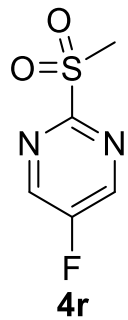

-129.88

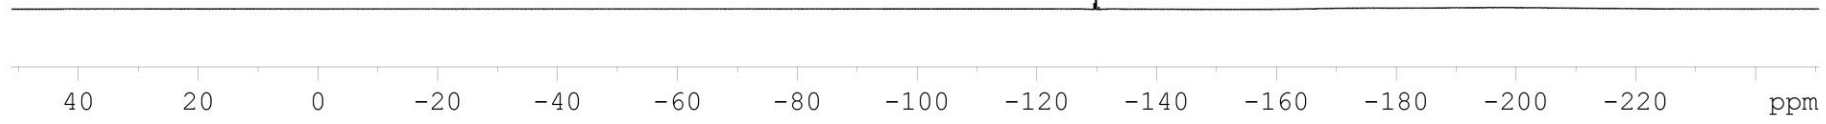

2-SO<sub>2</sub>Me 5-Cl

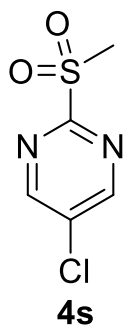

<sup>1</sup>H NMR (400 MHz, DMSO-d<sub>6</sub>)

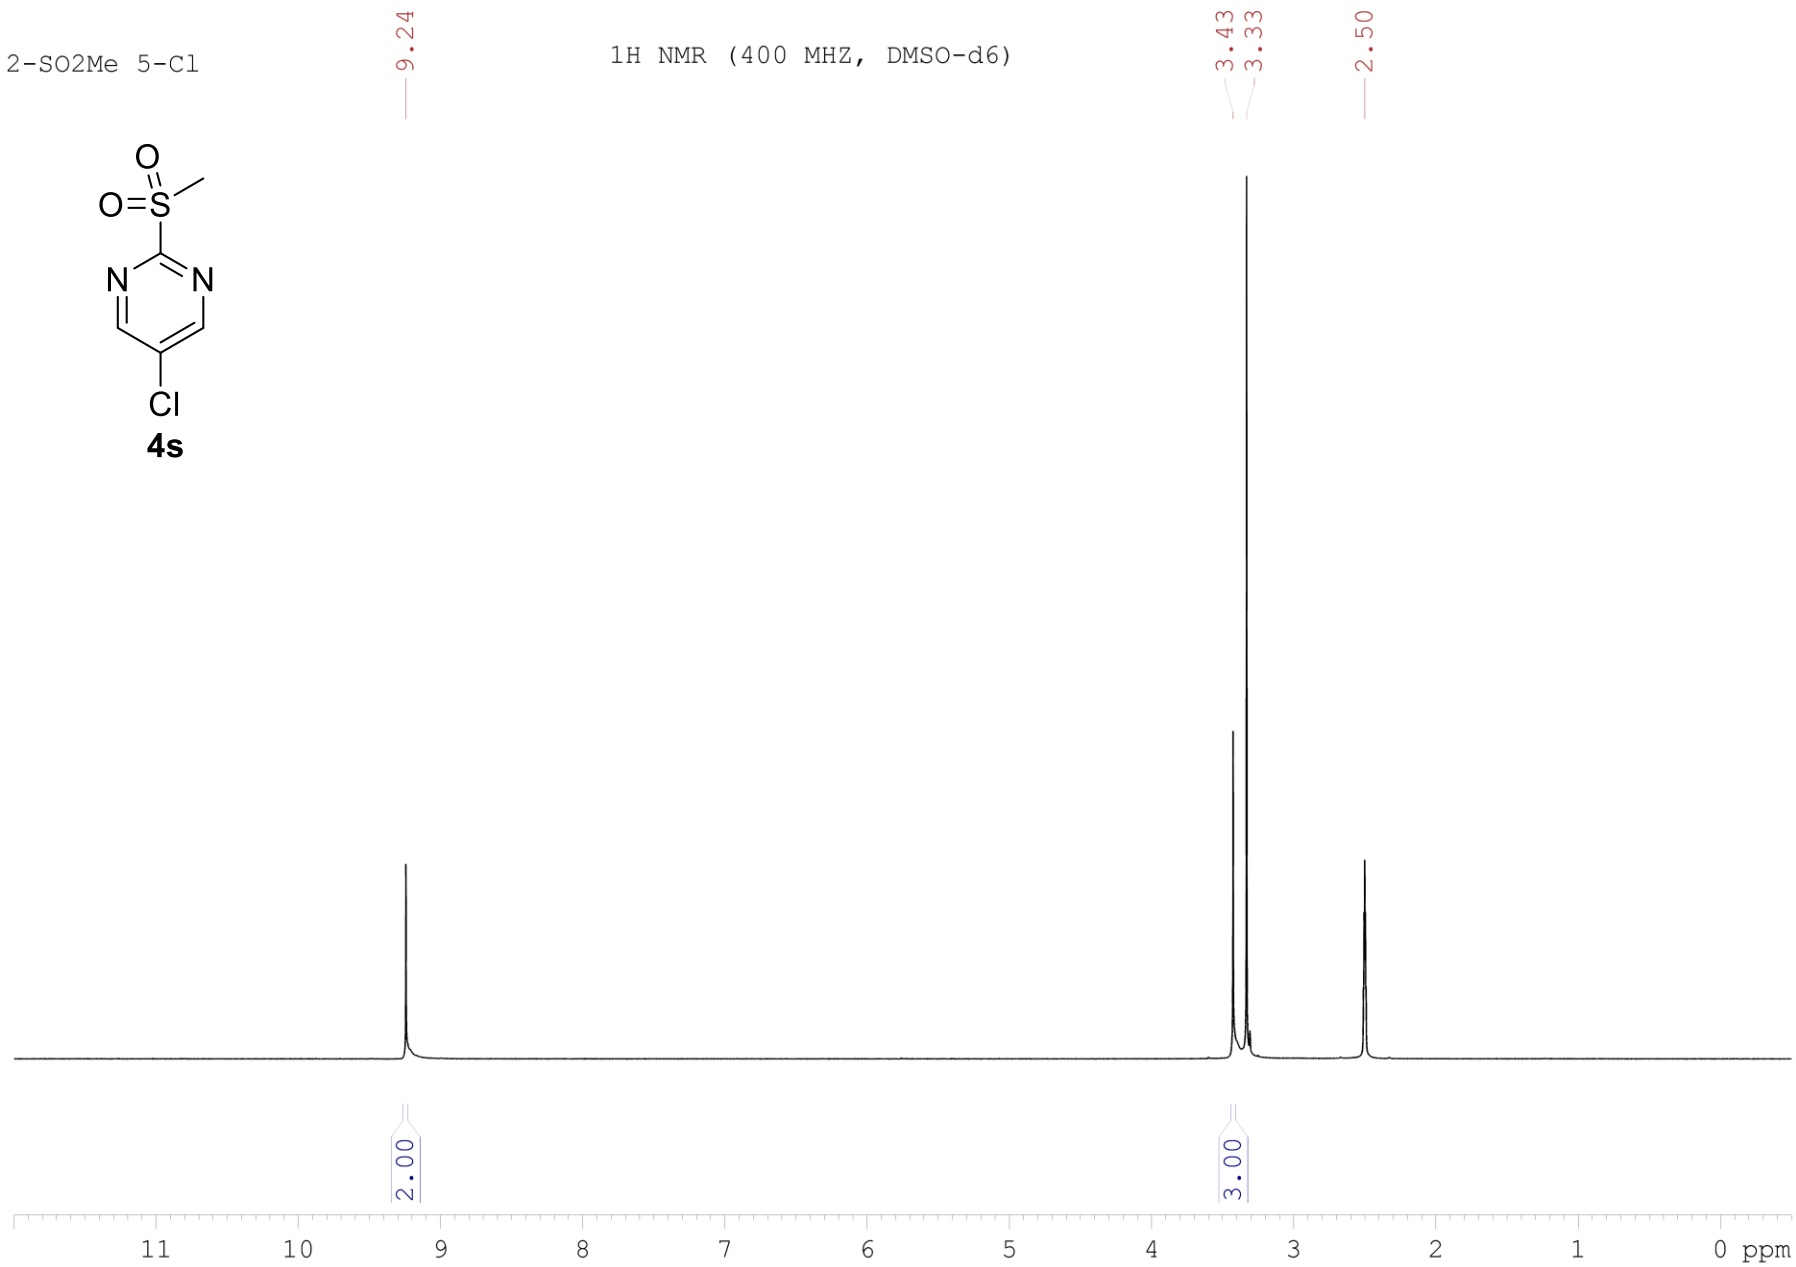

2-SO<sub>2</sub>Me 5-Br

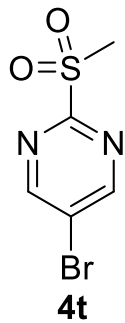

<sup>1</sup>H NMR (400 MHz, DMSO-d<sub>6</sub>)

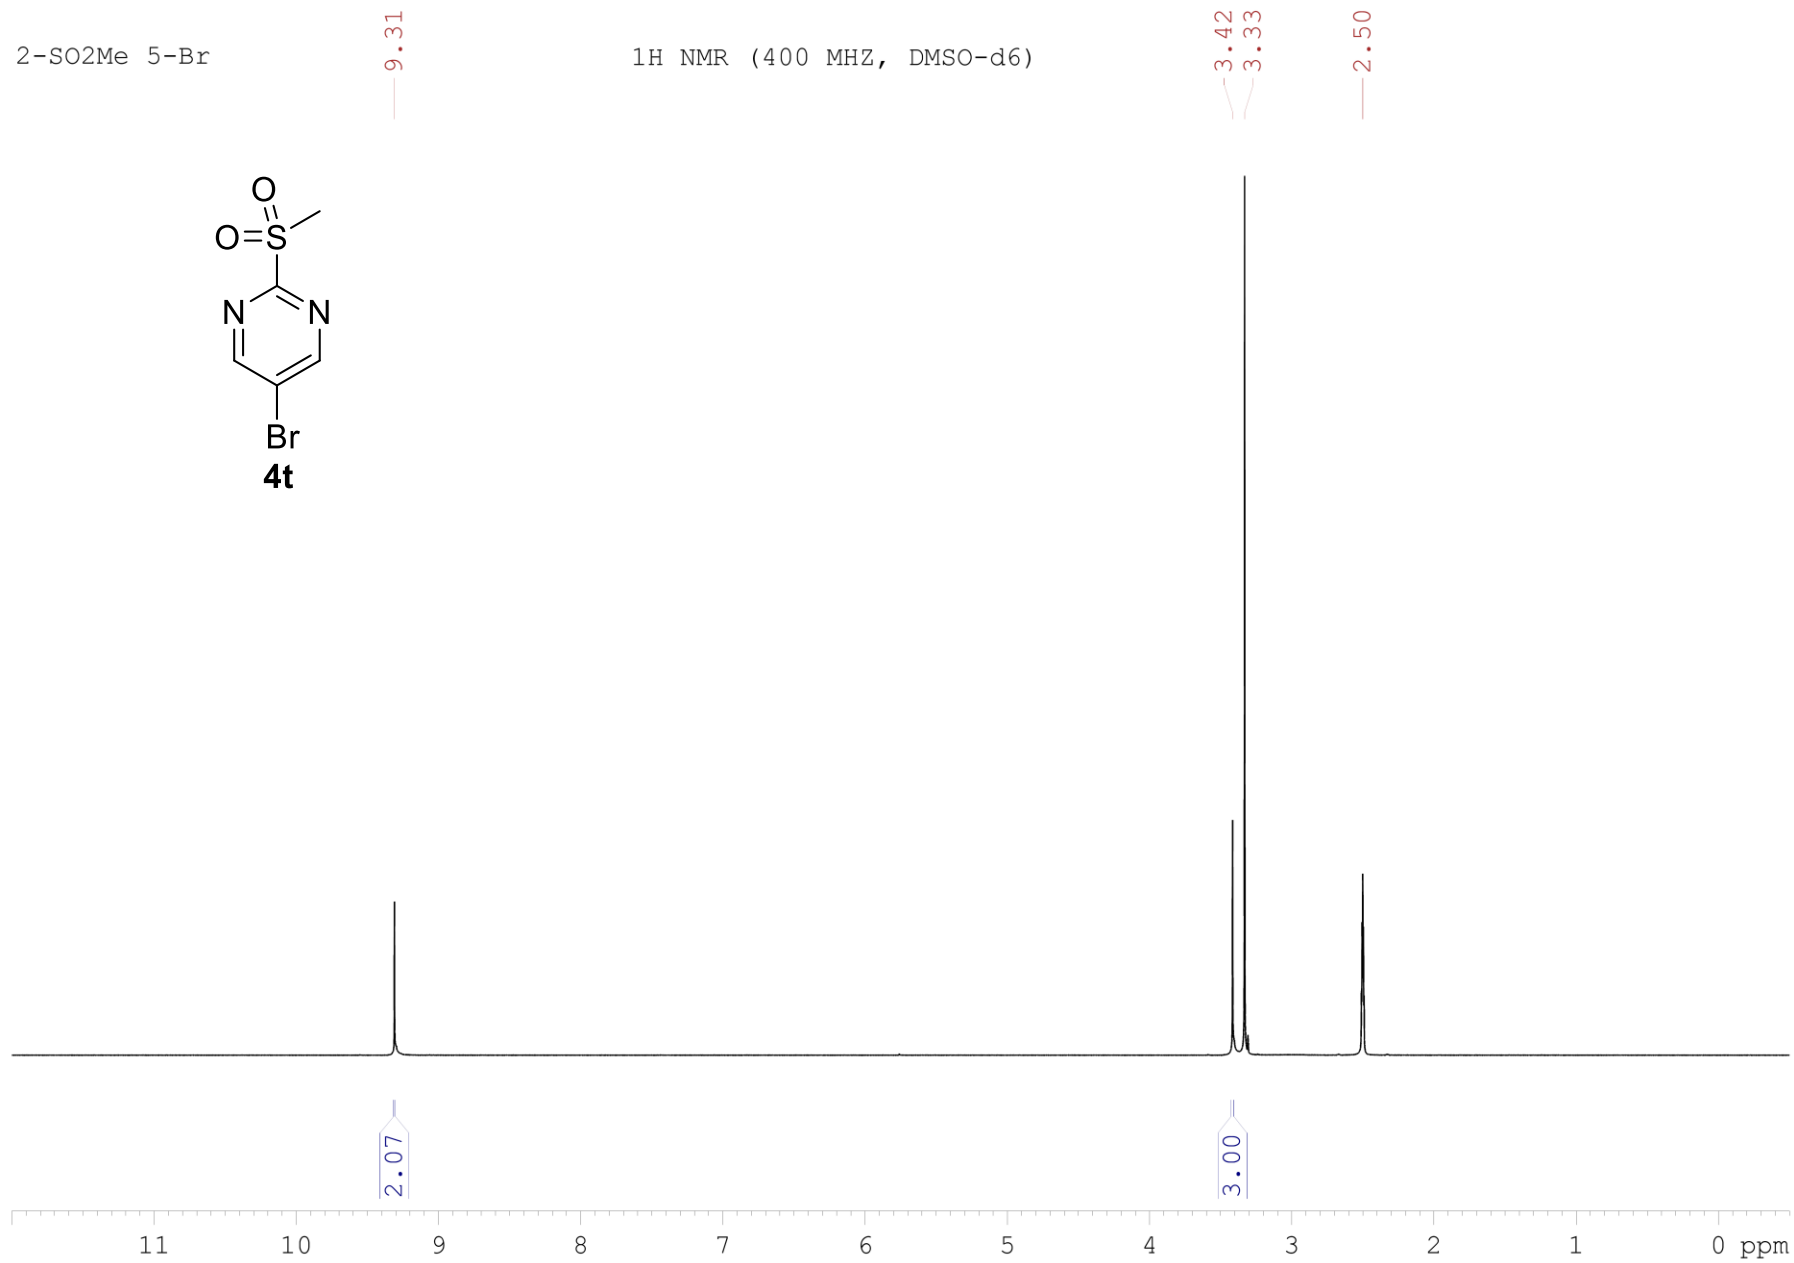

2-SO<sub>2</sub>Me 5-I

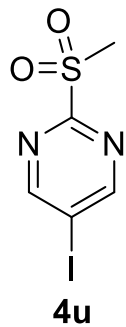

<sup>1</sup>H NMR (400 MHz, DMSO-d<sub>6</sub>)

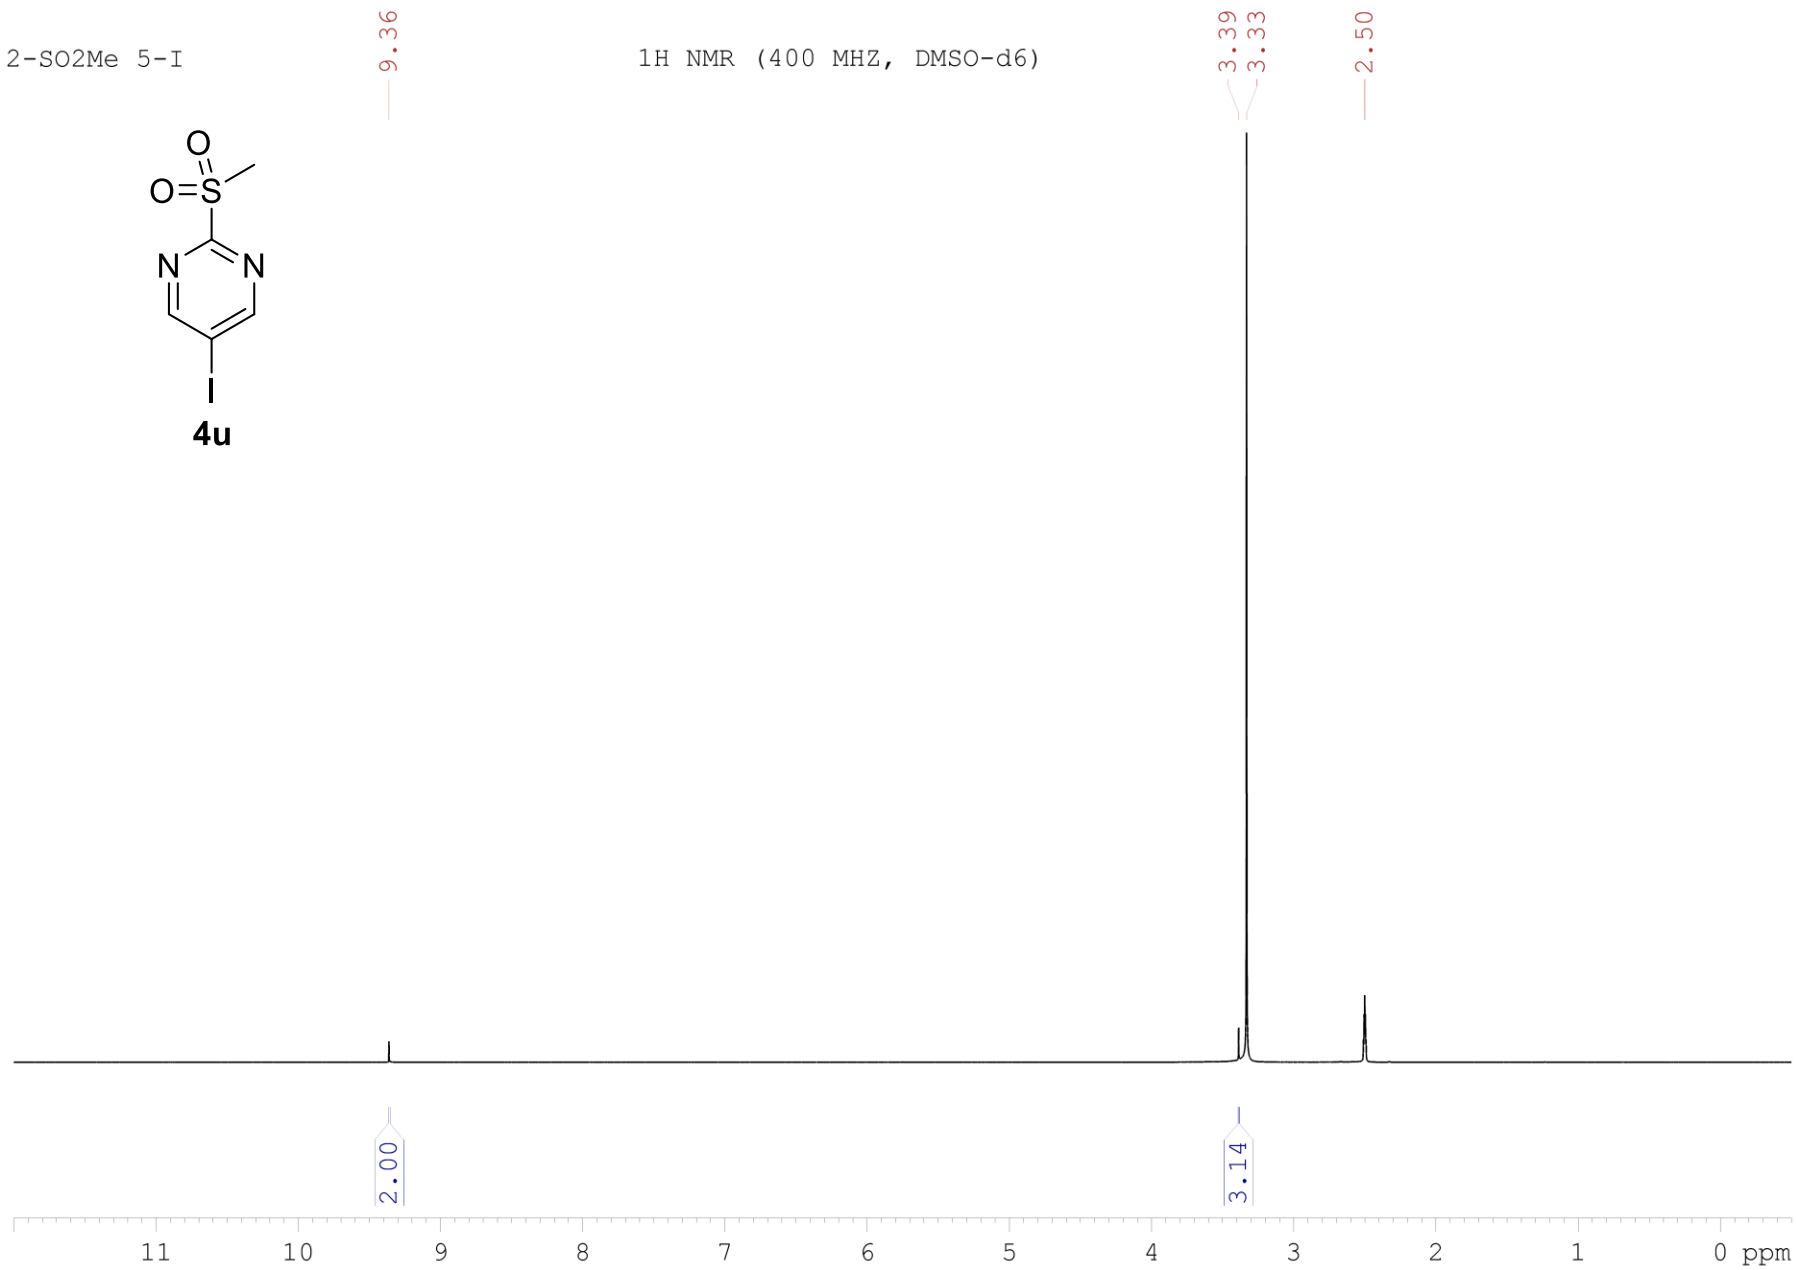

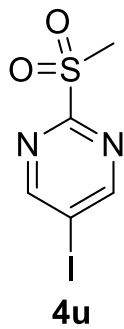

164.19  
163.96

<sup>13</sup>C NMR (100 MHz, DMSO-d<sub>6</sub>)

98.64

2-SO<sub>2</sub>Me 5-I

39.22

0.10

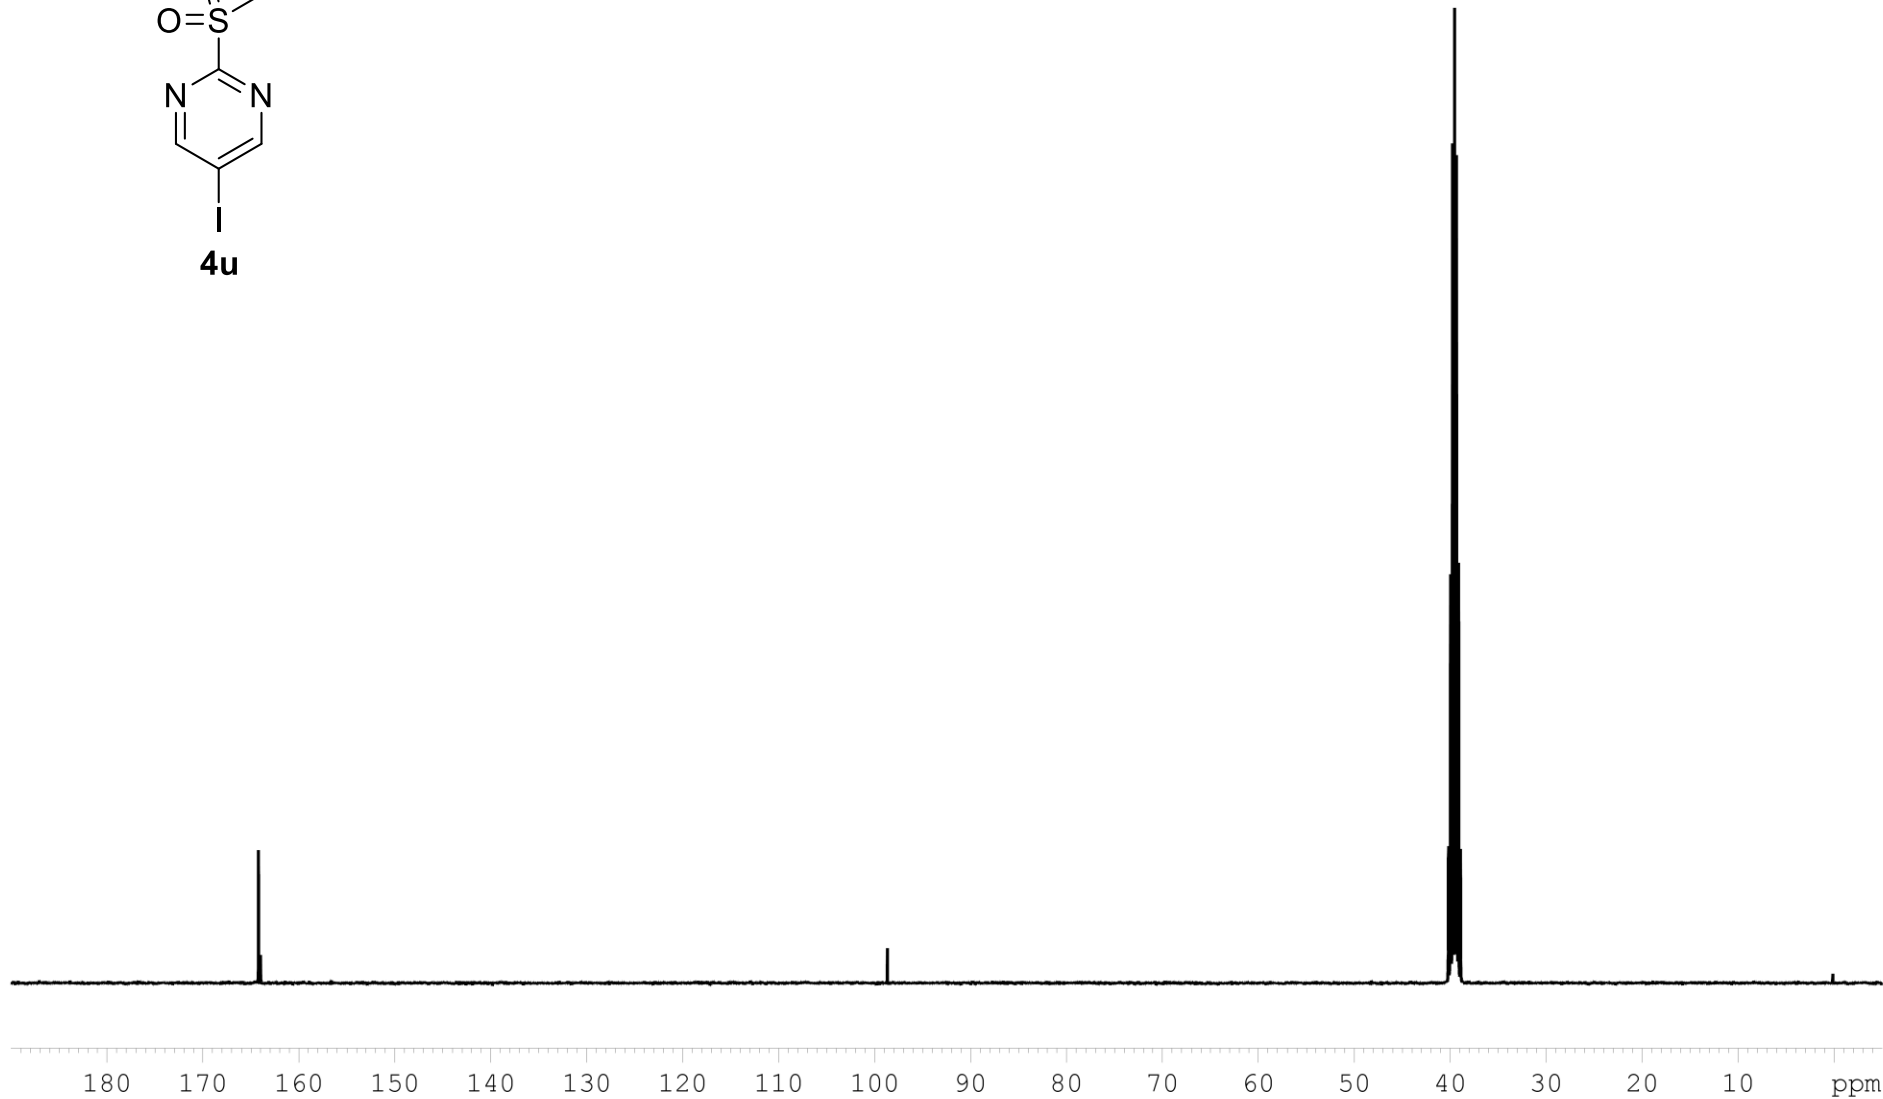



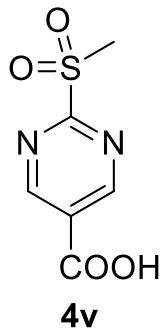

9.42

2-SO<sub>2</sub>Me 5-COOH  
1H (400 MHz, DMSO-d<sub>6</sub>)

3.46

2.50

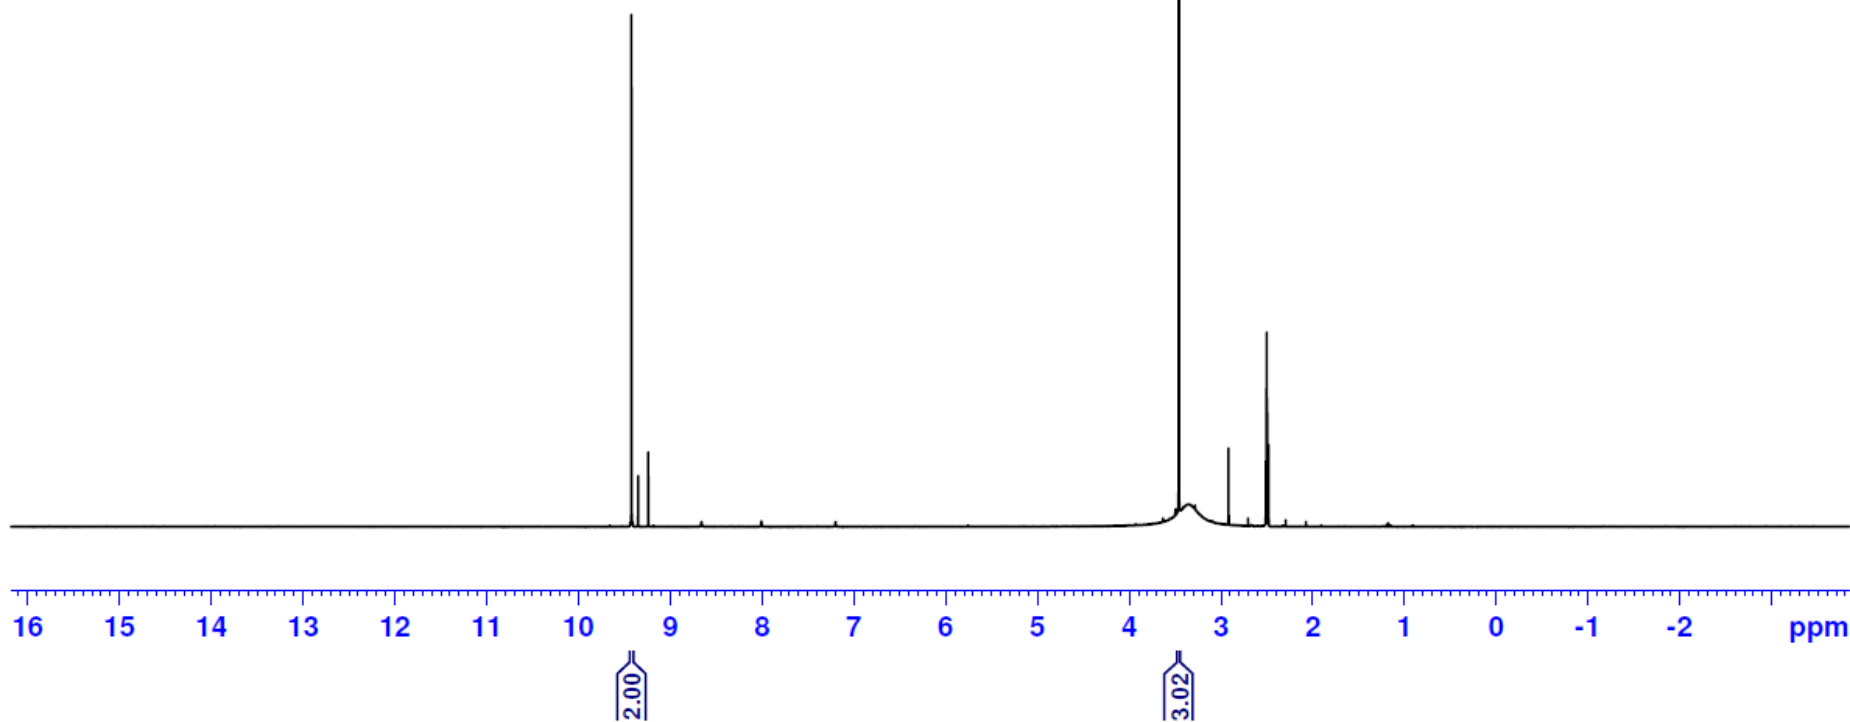

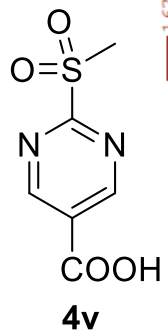

167.24  
163.75  
159.65  
159.19

2-SO<sub>2</sub>Me 5-COOH  
13C (100 MHz, DMSO-D<sub>6</sub>)

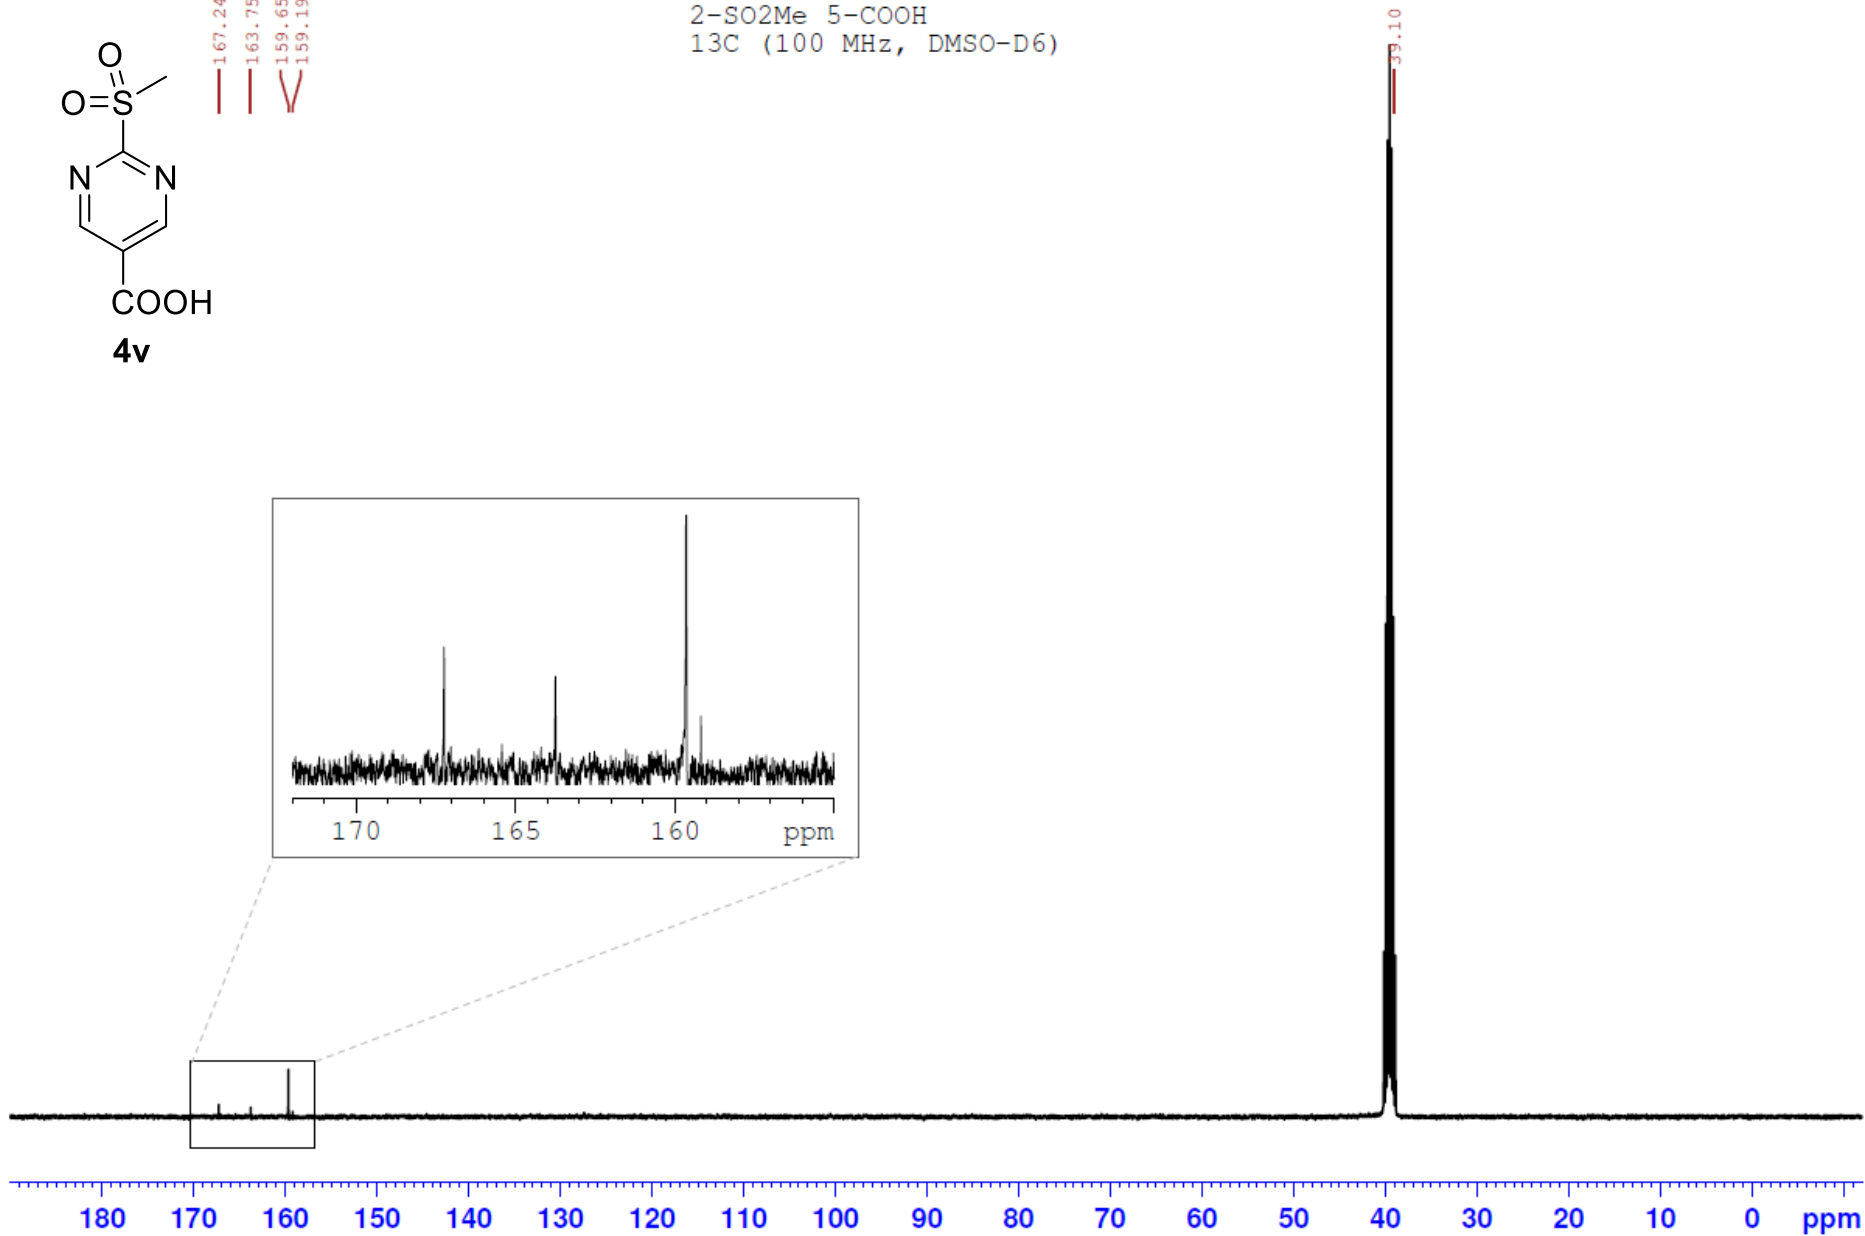

2-SO<sub>2</sub>Me 5-NO<sub>2</sub>  
1H (400 MHz, CDCl<sub>3</sub>)

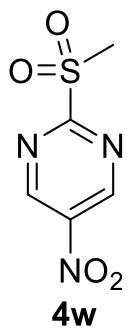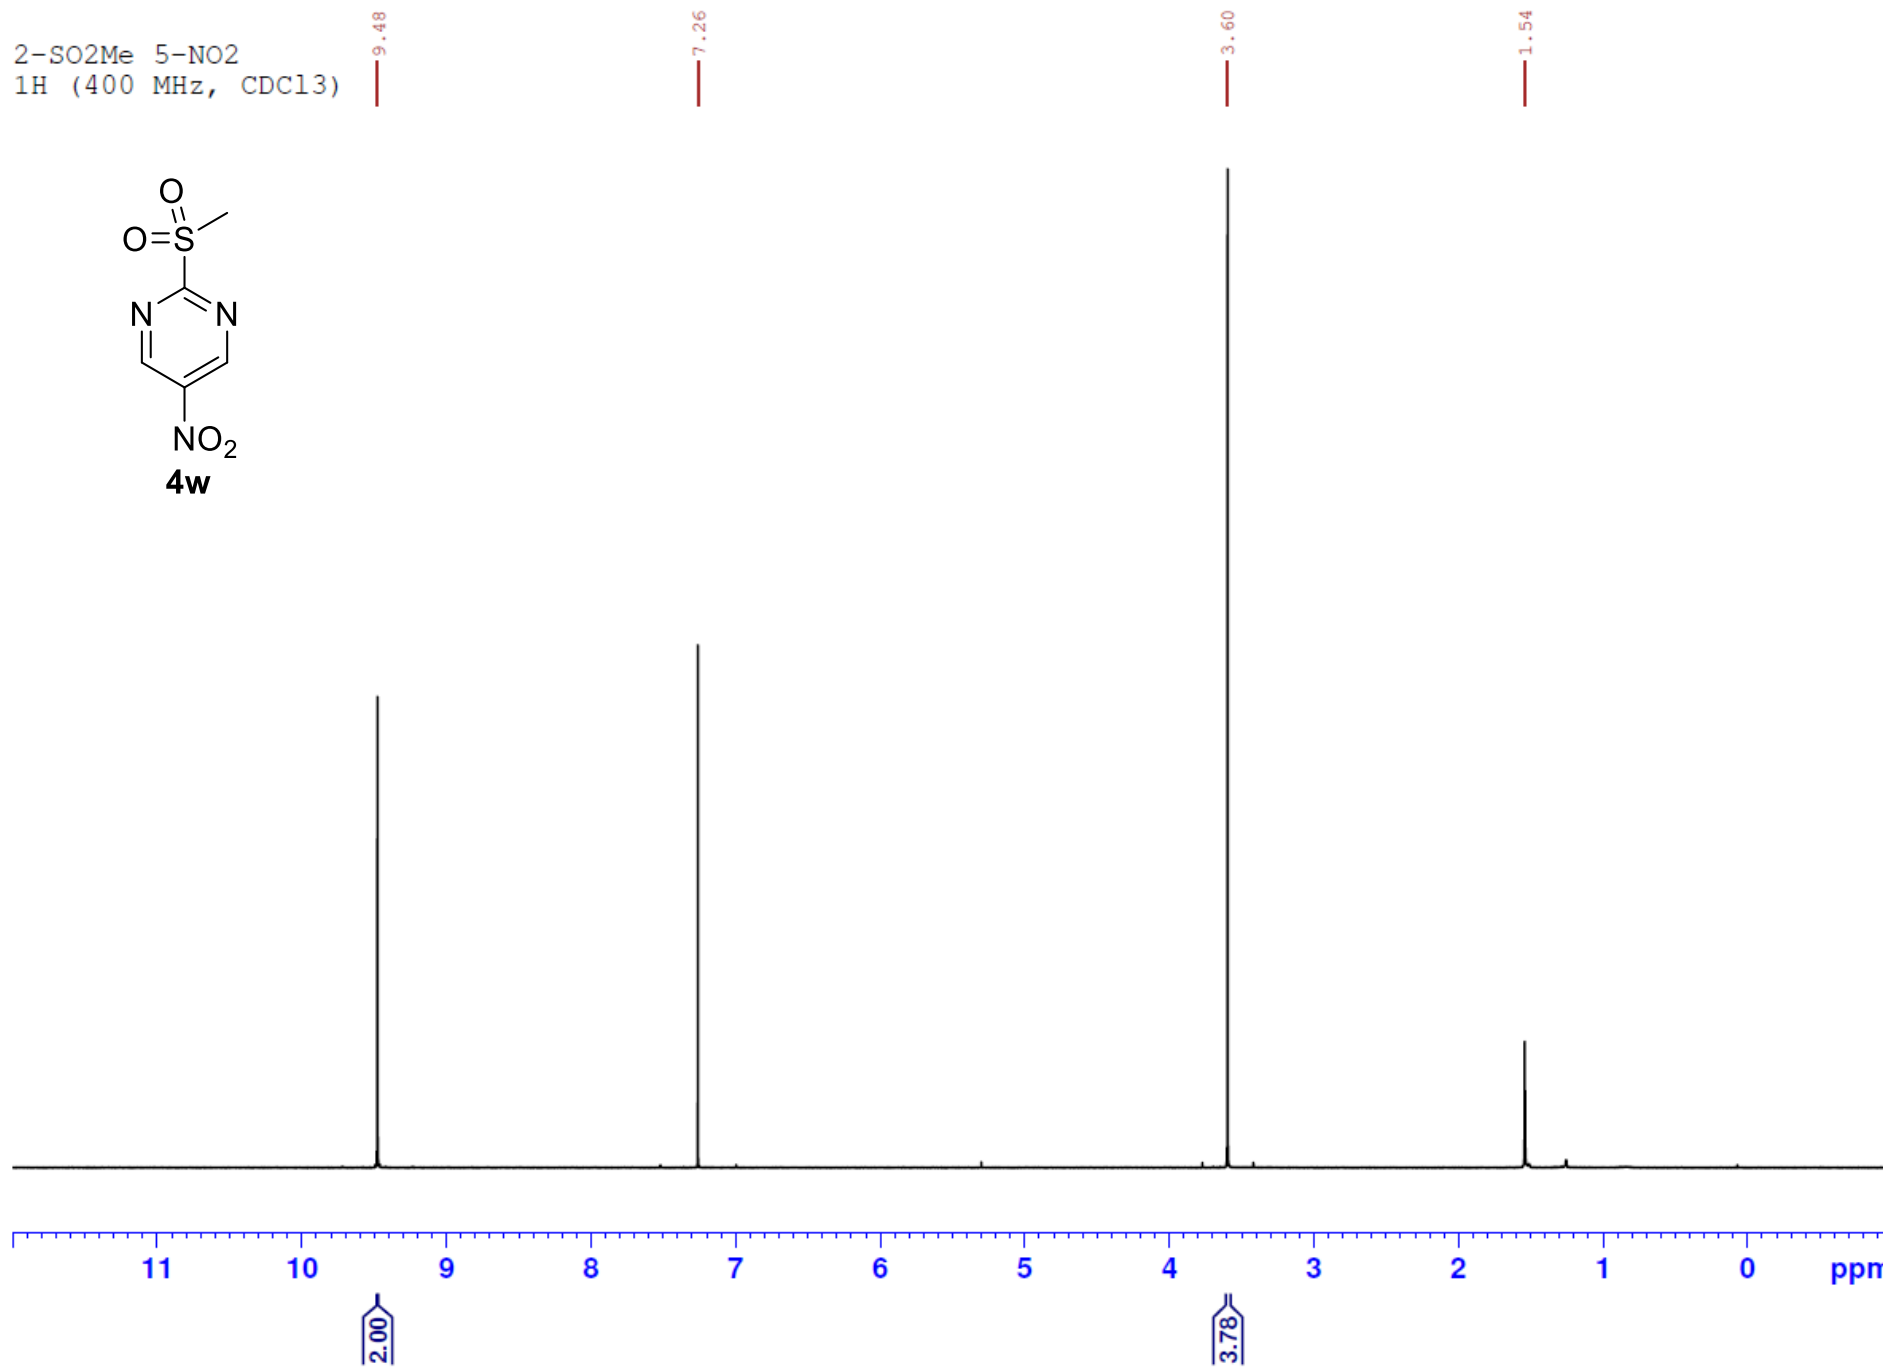

2-SO<sub>2</sub>Me 5-NO<sub>2</sub>  
<sup>13</sup>C NMR (100 MHz, CDCl<sub>3</sub>)

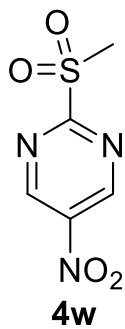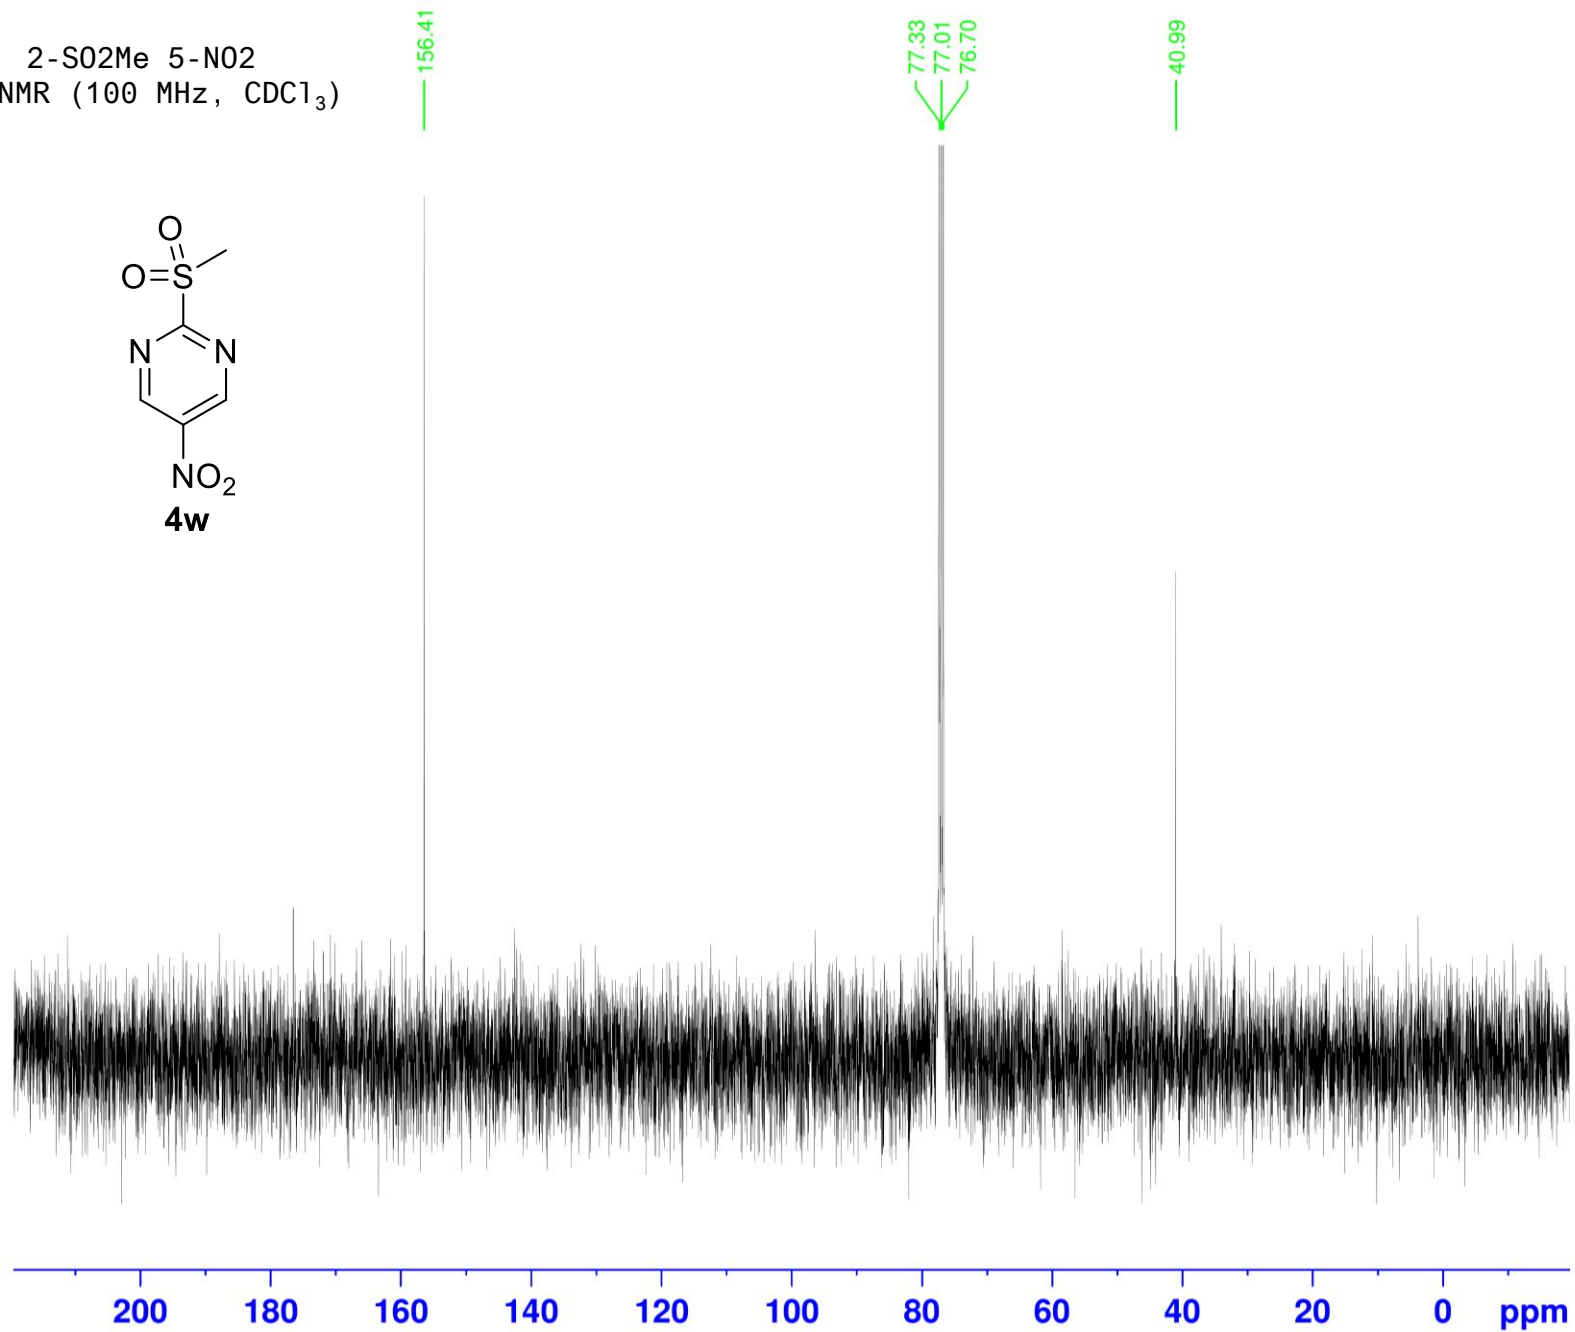

2-SO<sub>2</sub>Me 5-CF<sub>3</sub>

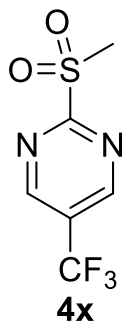

<sup>1</sup>H NMR (400 MHz, DMSO-d<sub>6</sub>)

9.37  
9.37

3.78

3.32

2.50

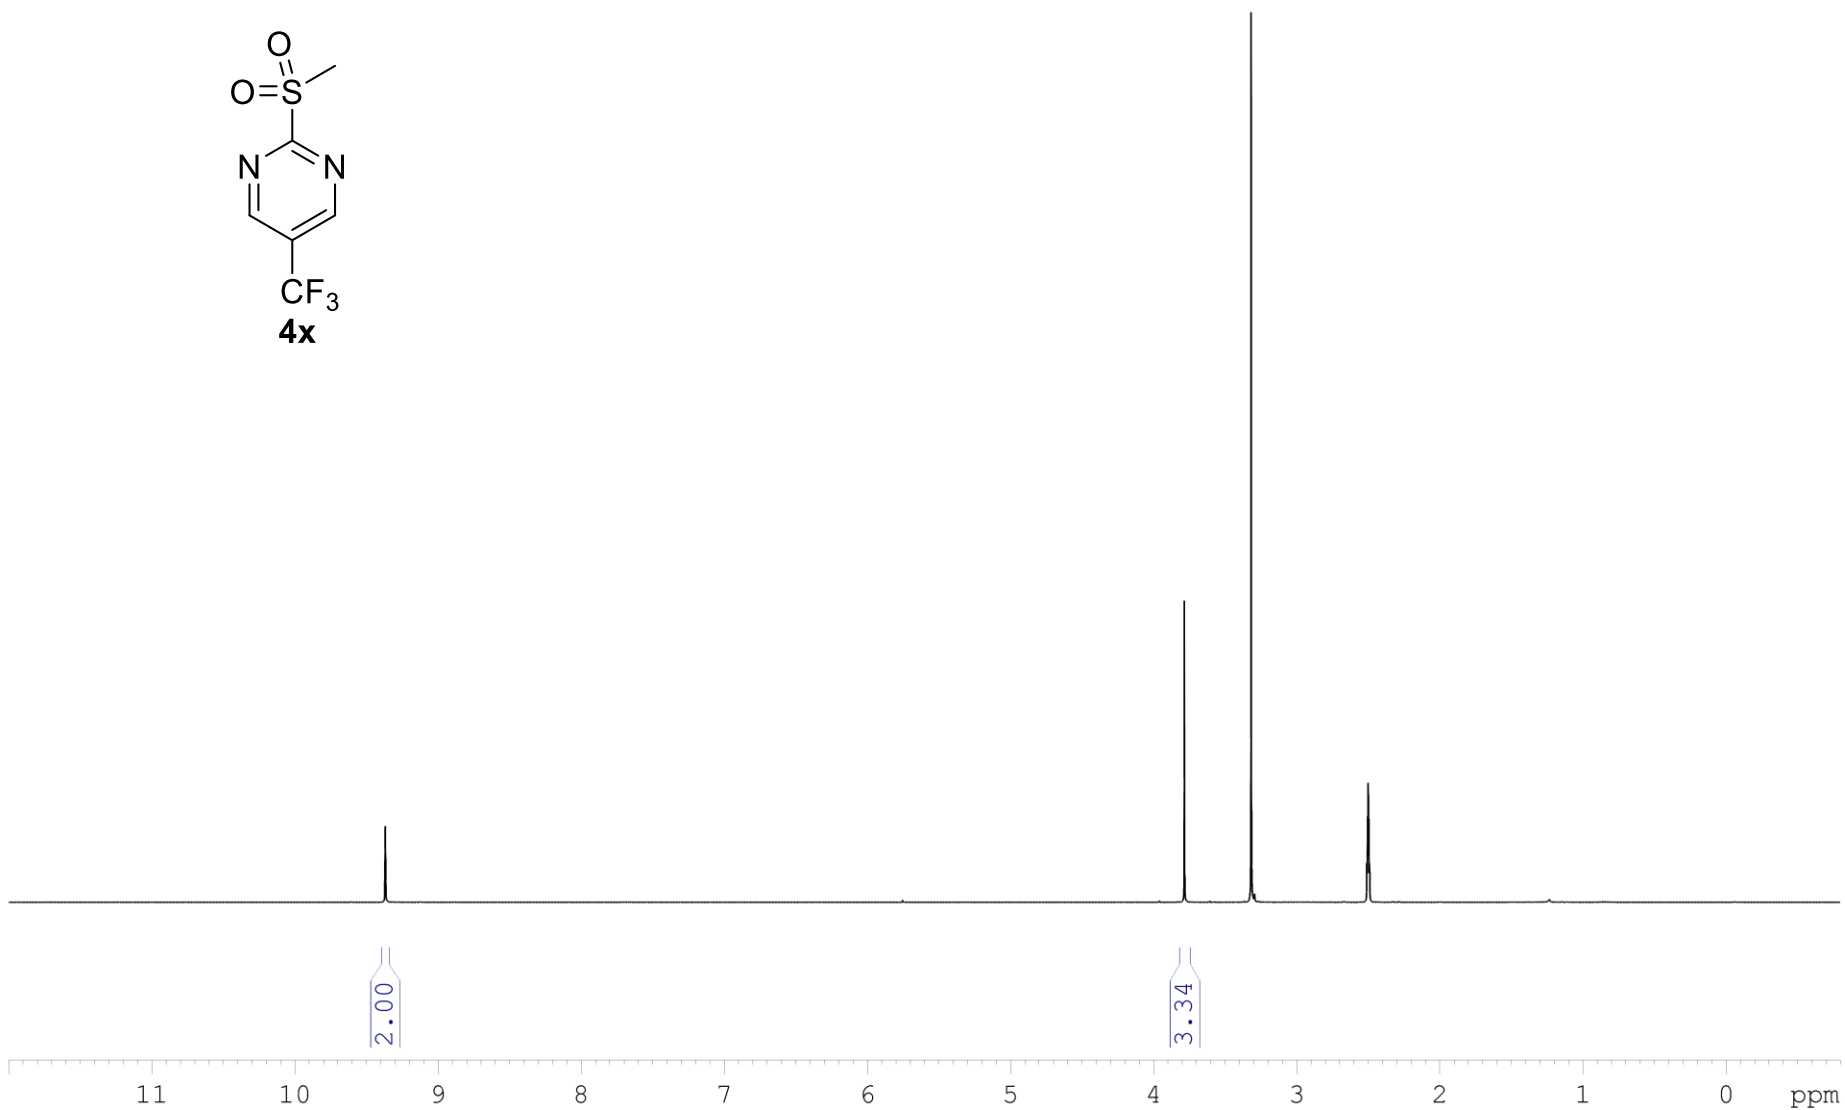

2.00

3.34

11 10 9 8 7 6 5 4 3 2 1 0 ppm

2-SO2Me 5-CF3

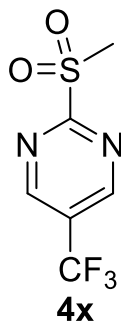

167.89  
157.12  
157.08  
157.05  
157.01

126.19  
125.85  
125.51  
125.18  
123.54  
120.82

<sup>13</sup>C NMR (100 MHz, DMSO-d<sub>6</sub>)

39.07

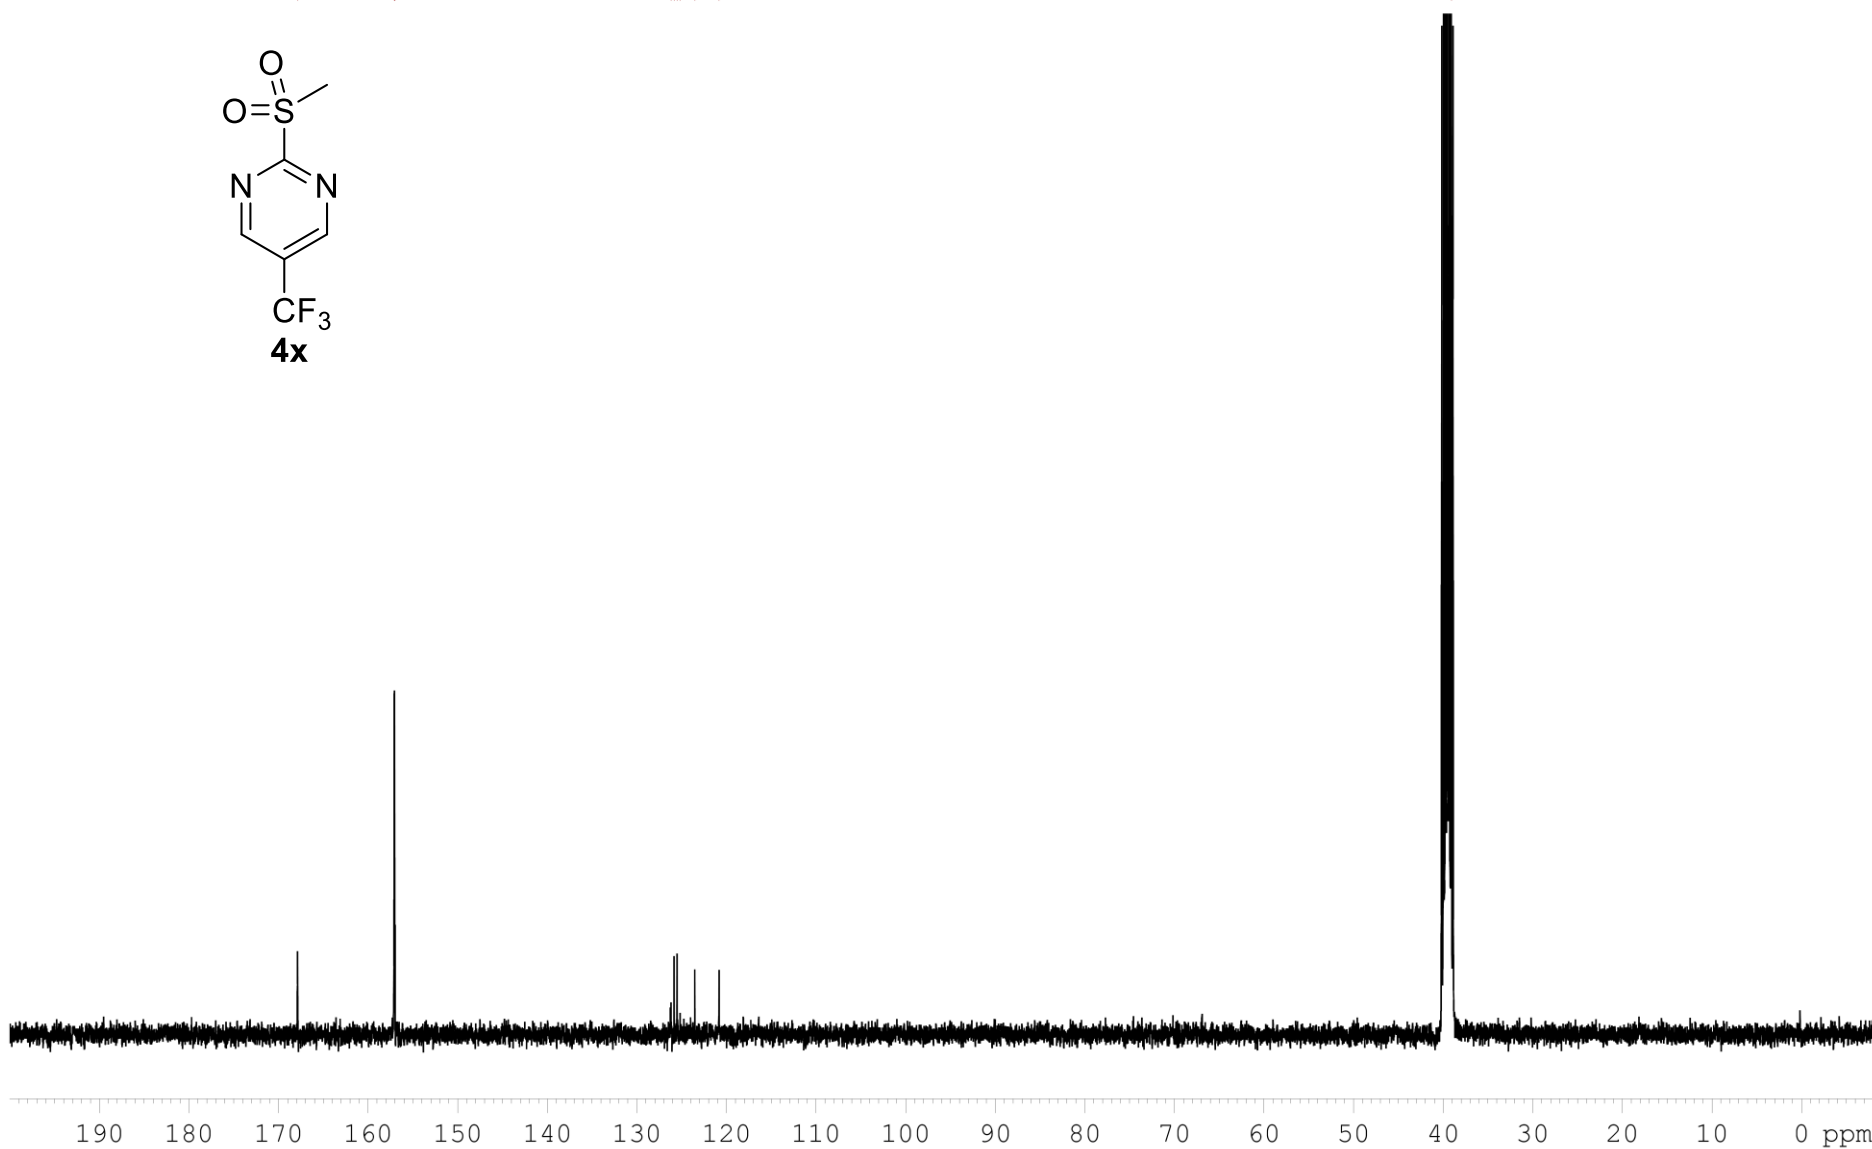

2-SO<sub>2</sub>Me 5-CF<sub>3</sub>  
19F NMR (376 MHz, DMSO-d<sub>6</sub>)

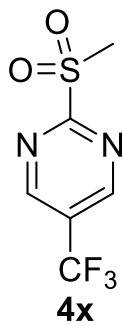

-60.08

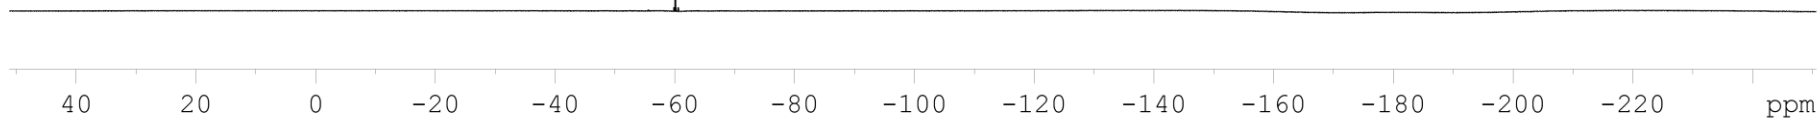

2-SO<sub>2</sub>Me 5-COOMe

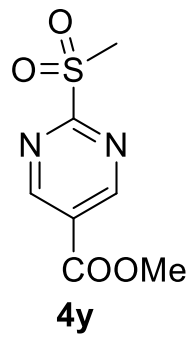

<sup>1</sup>H NMR (400 MHz, DMSO-d<sub>6</sub>)

9.48  
9.47

3.96  
3.96  
3.47  
3.47  
3.32

2.50

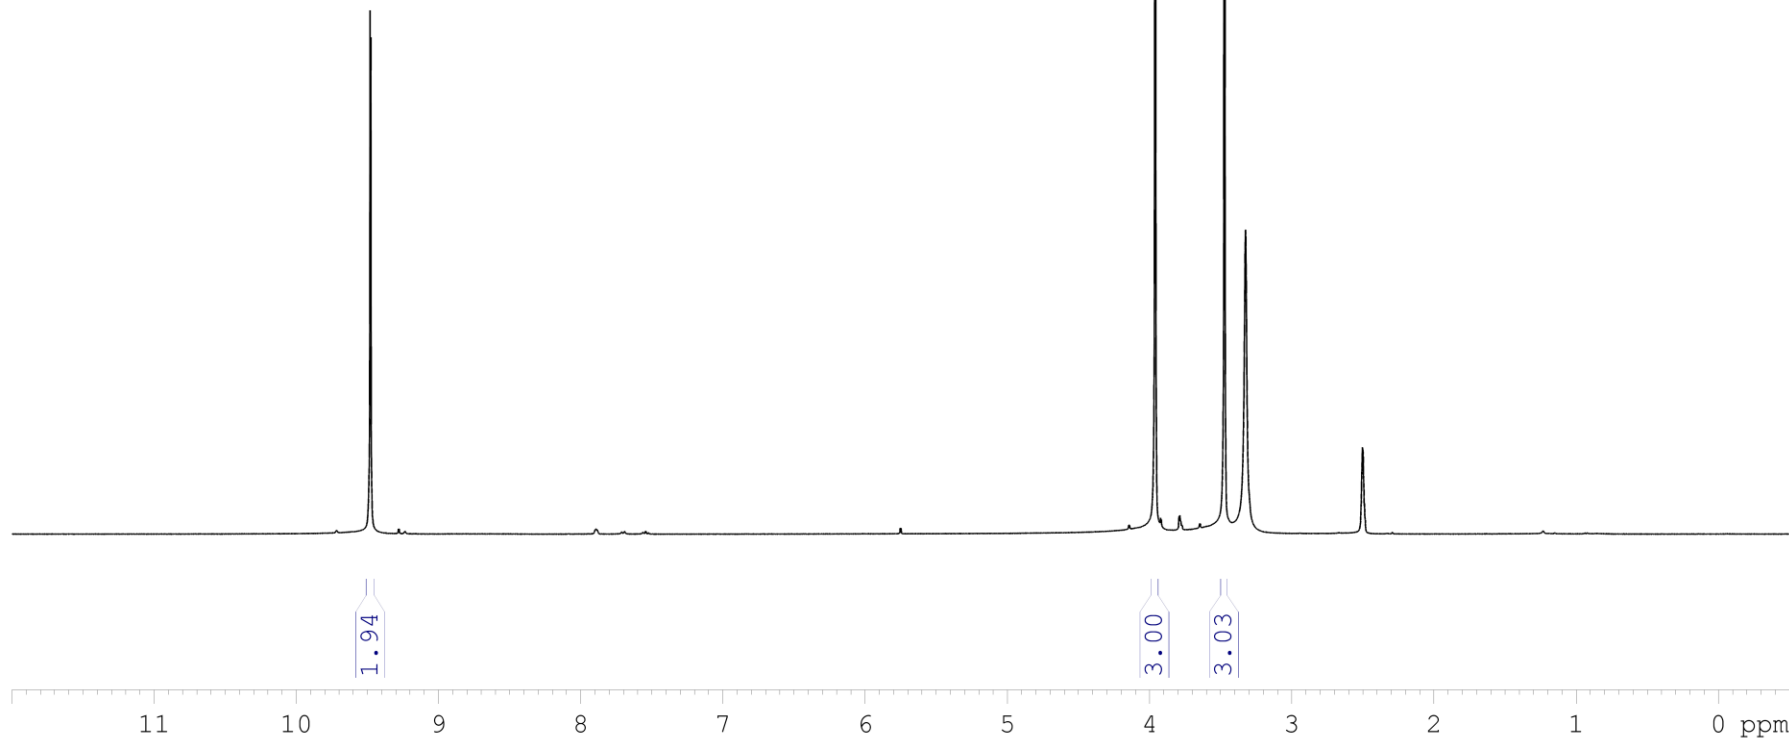



2-SO<sub>2</sub>Me 5-COOMe

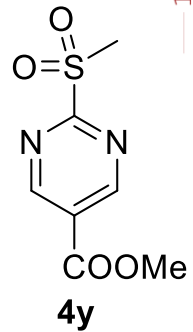

— 167.49  
— 162.80  
— 159.56

— 126.09

<sup>13</sup>C NMR (100 MHz, DMSO-d<sub>6</sub>)

— 53.12

— 39.05

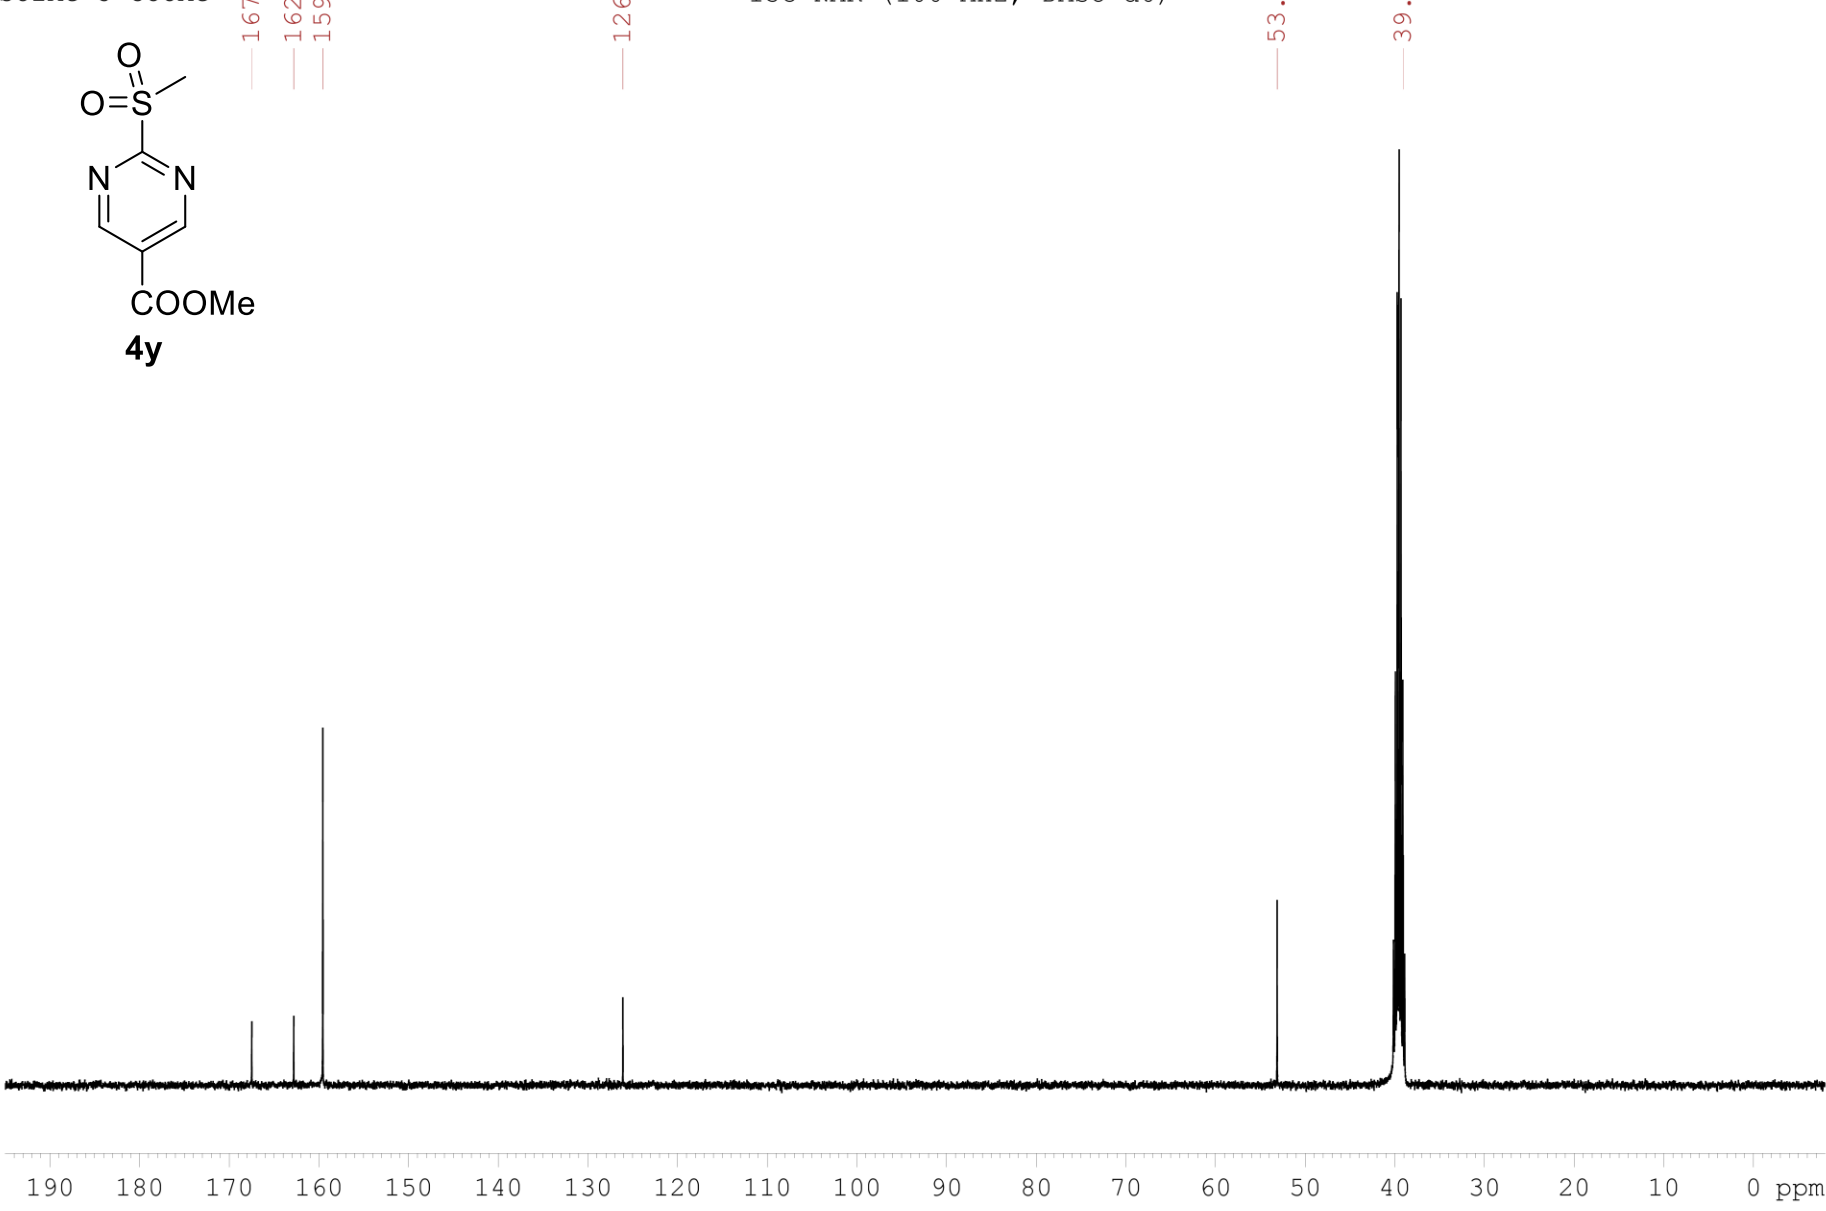

2-SO<sub>2</sub>tBu pyrimidine

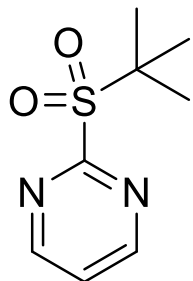

**5a**

<sup>1</sup>H NMR (400 MHz, DMSO-d<sub>6</sub>)

9.12  
9.11

7.87

3.33

1.35

2.00

1.04

10.20

11 10 9 8 7 6 5 4 3 2 1 0 ppm

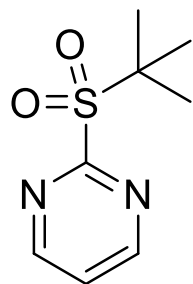

**5a**

2-SO<sub>2</sub>tBu pyrimidine  
13C NMR (100 MHz, DMSO-d<sub>6</sub>)

163.35  
159.01

124.60

59.79

23.15

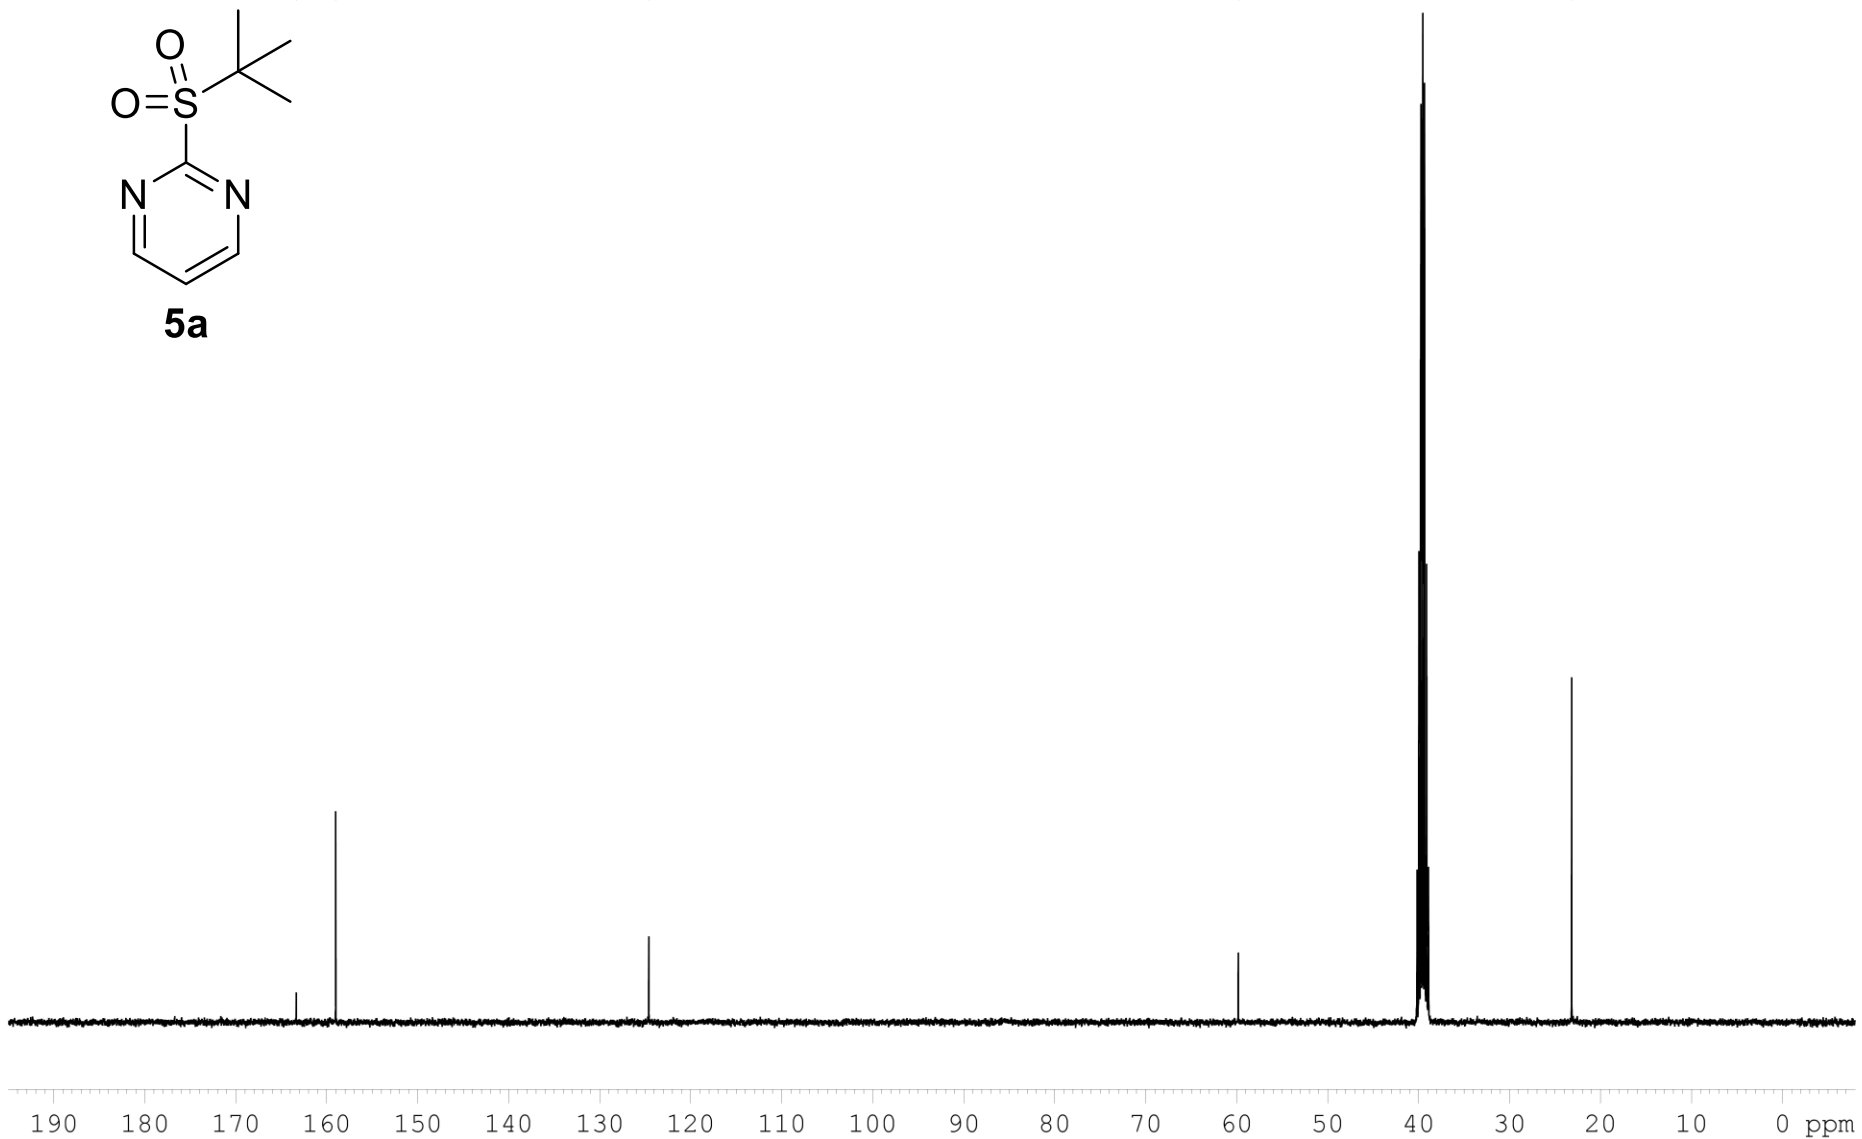

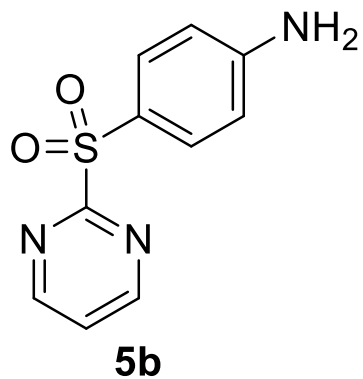

2-SO<sub>2</sub>(p-NH<sub>2</sub>Ph)  
1H (400 MHz, DMSO-d<sub>6</sub>)

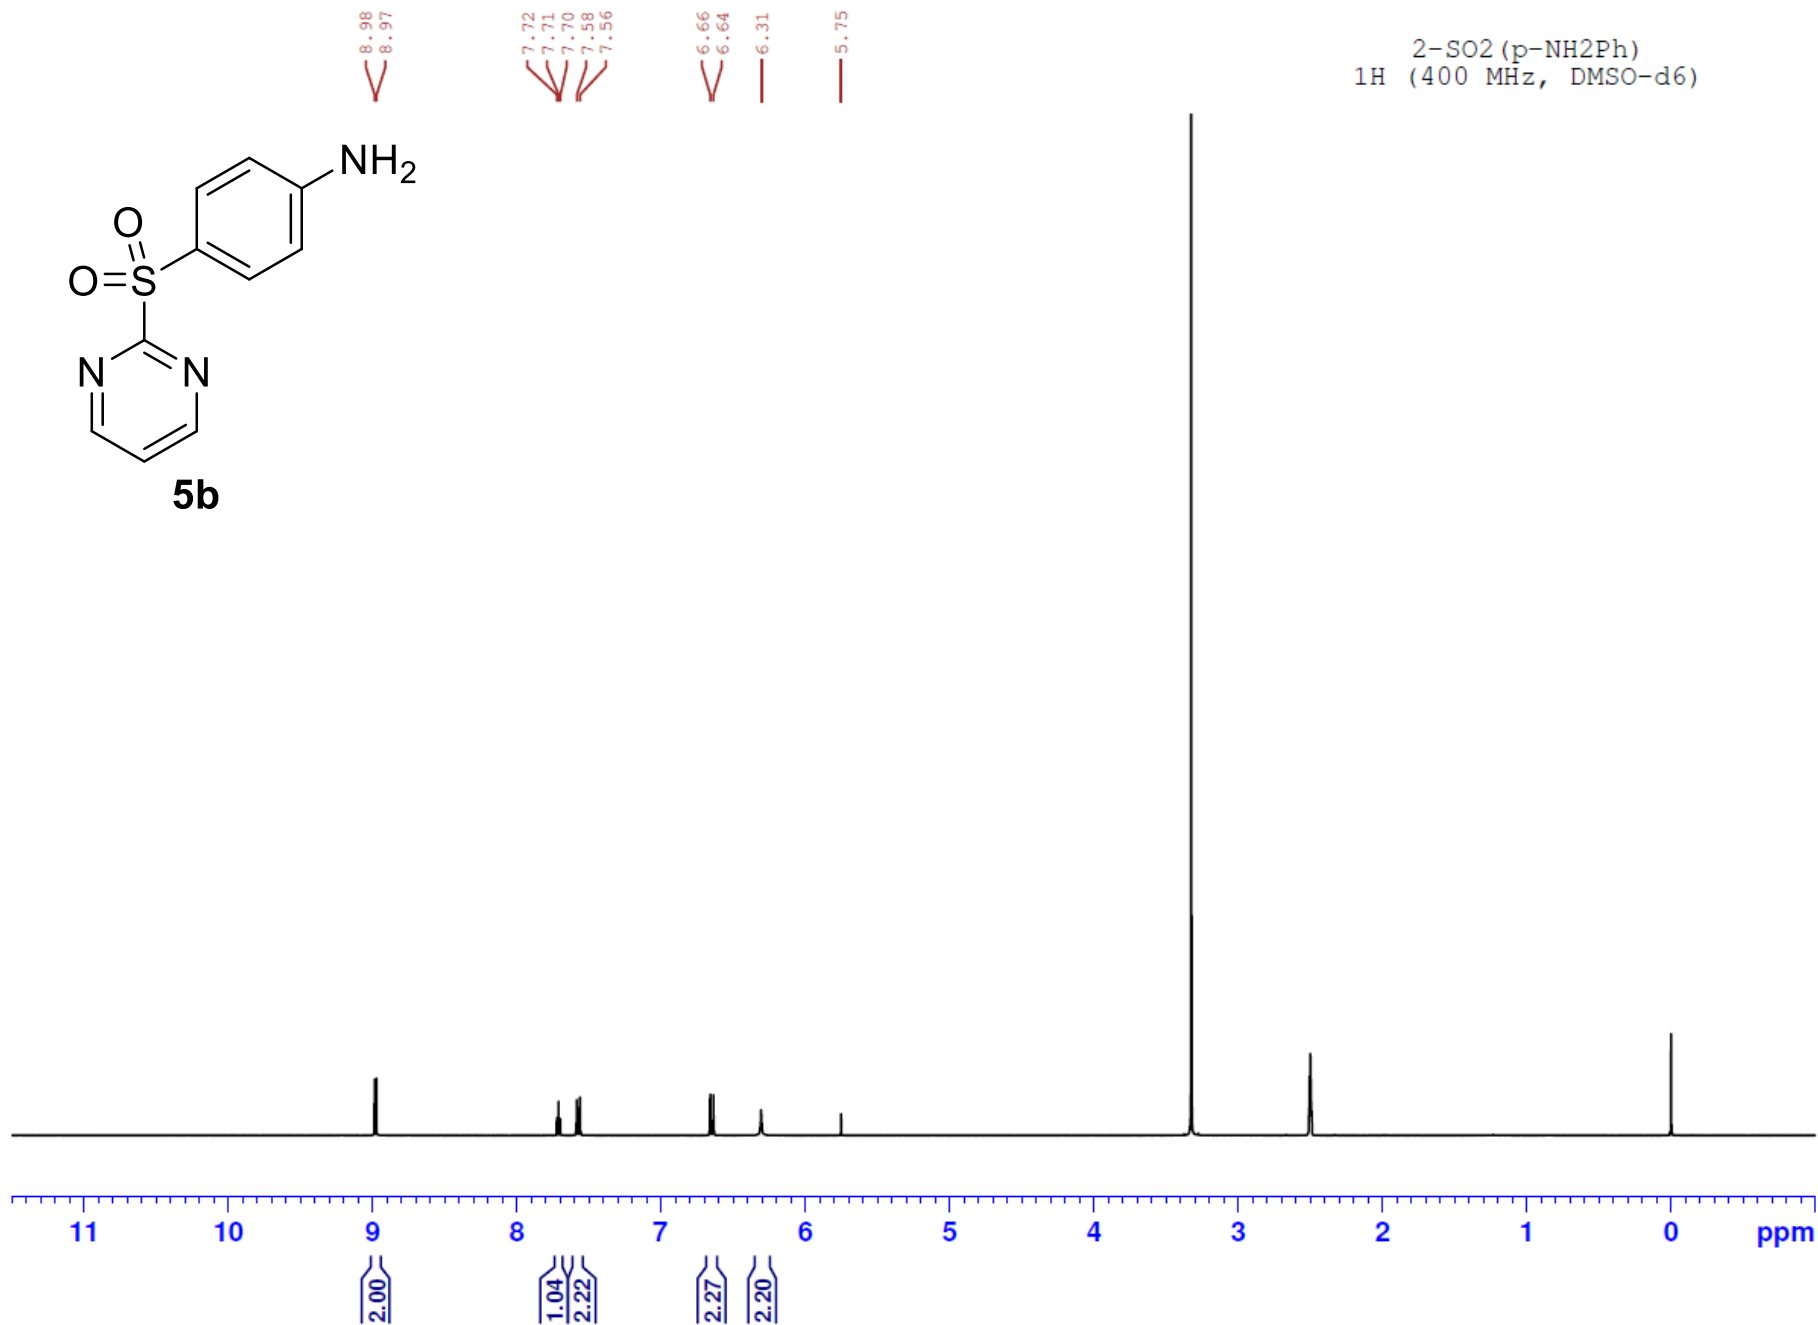

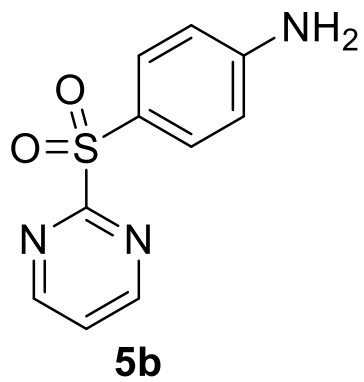

2-SO<sub>2</sub> (p-NH<sub>2</sub>Ph)  
13C (100 MHz, DMSO-d<sub>6</sub>)

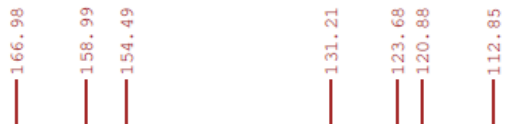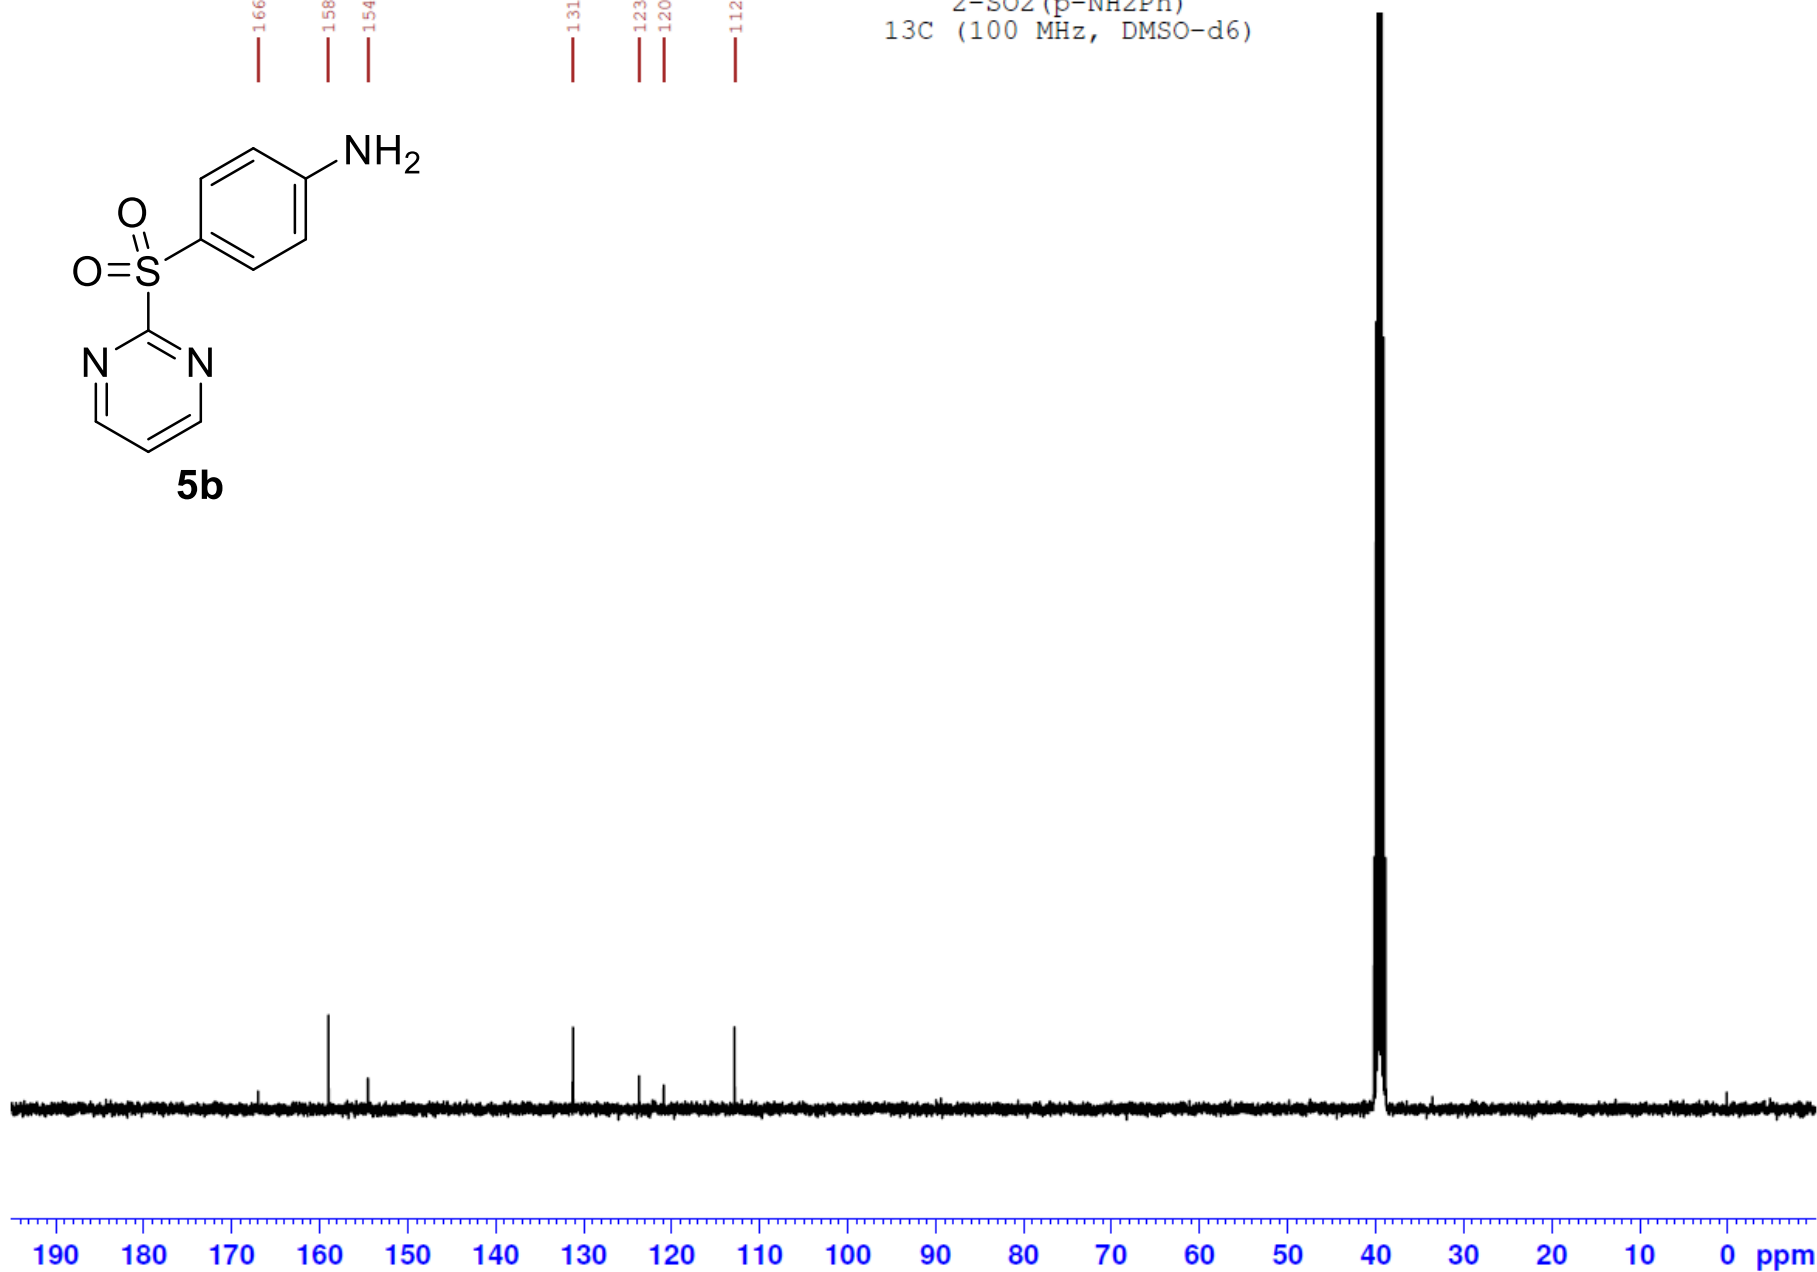

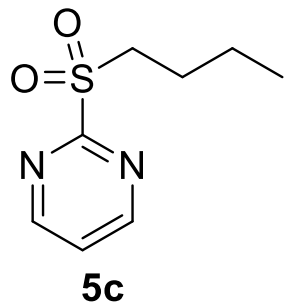

2-SO<sub>2</sub>nBu pyrimidine  
1H NMR (400 MHz, DMSO-d<sub>6</sub>)

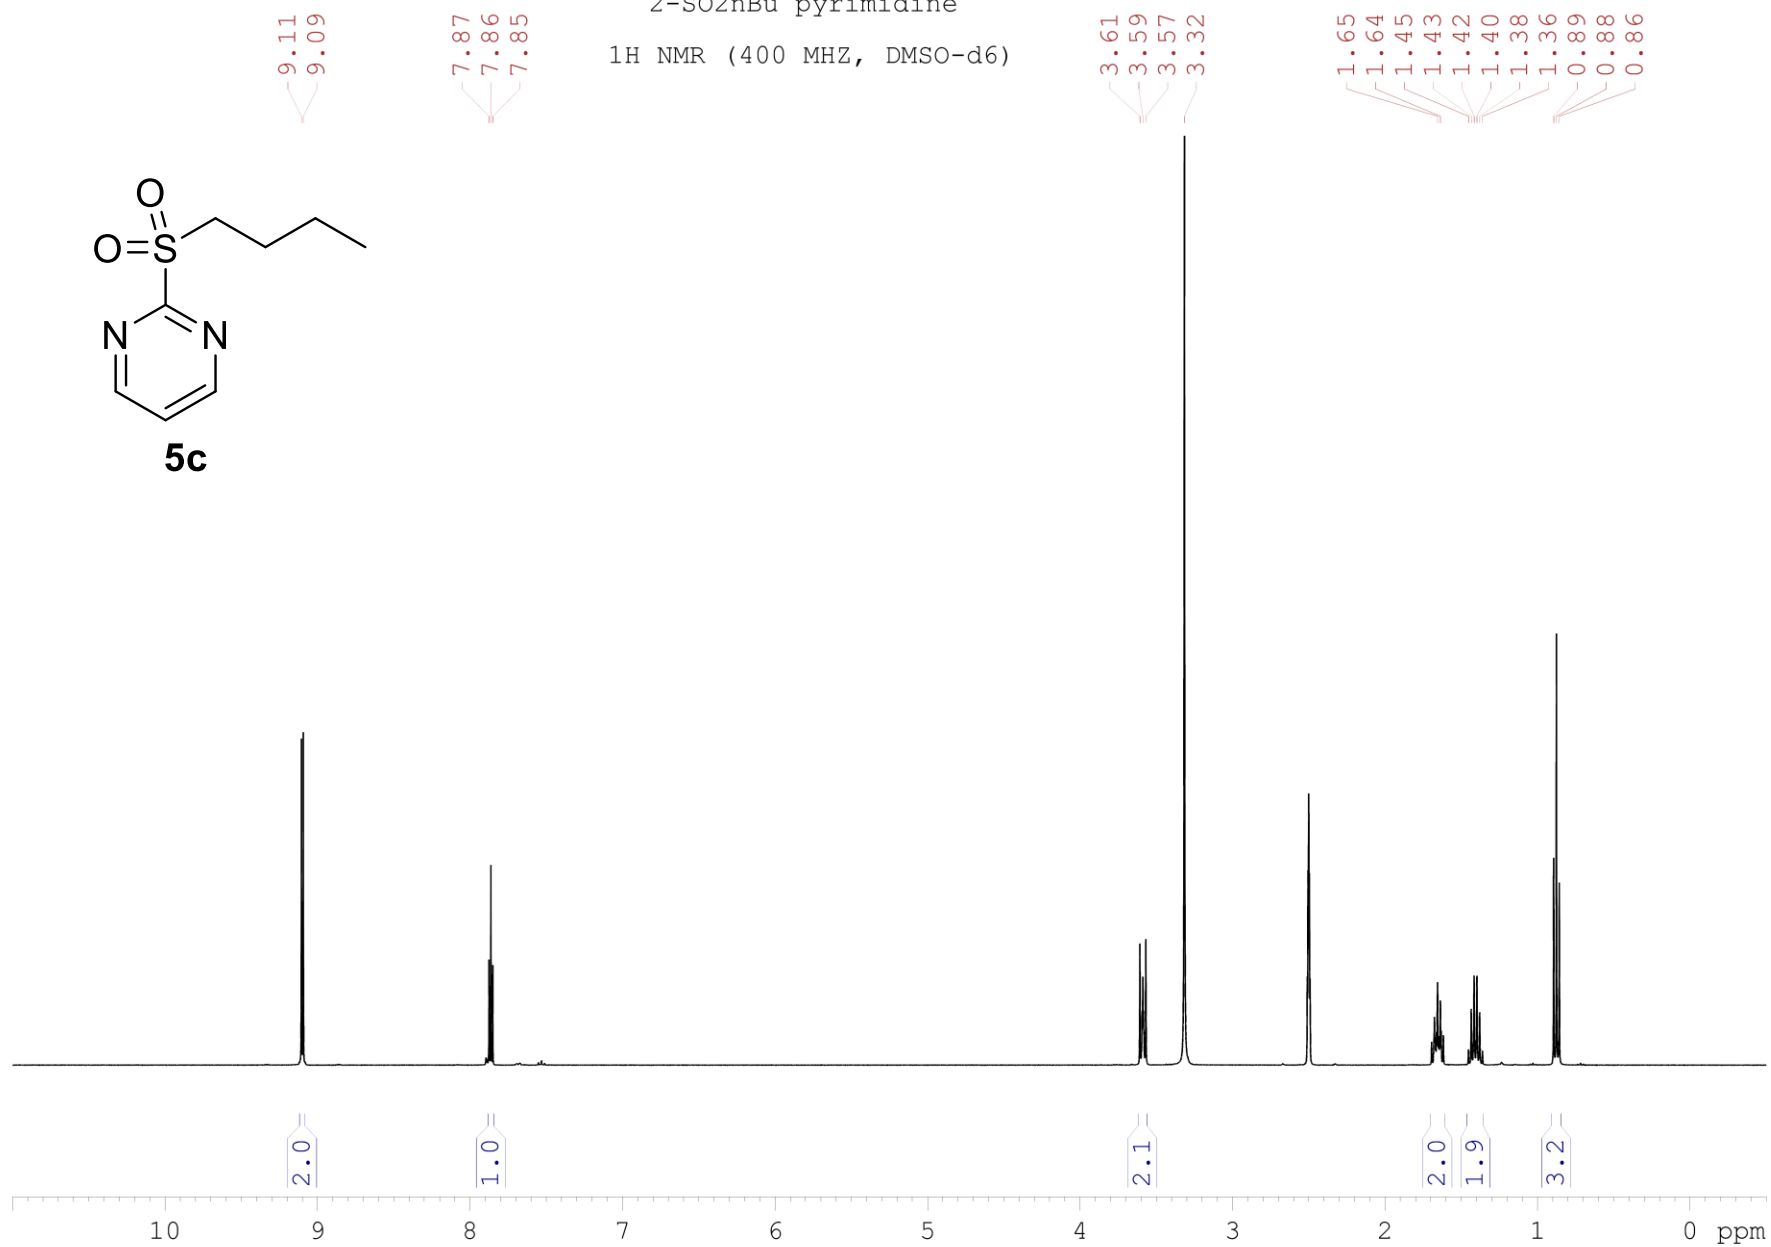

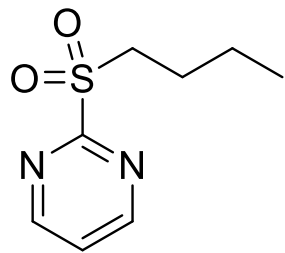

**5c**

2-SO<sub>2</sub>nBu  
13C (100 MHz, DMSO-d<sub>6</sub>)

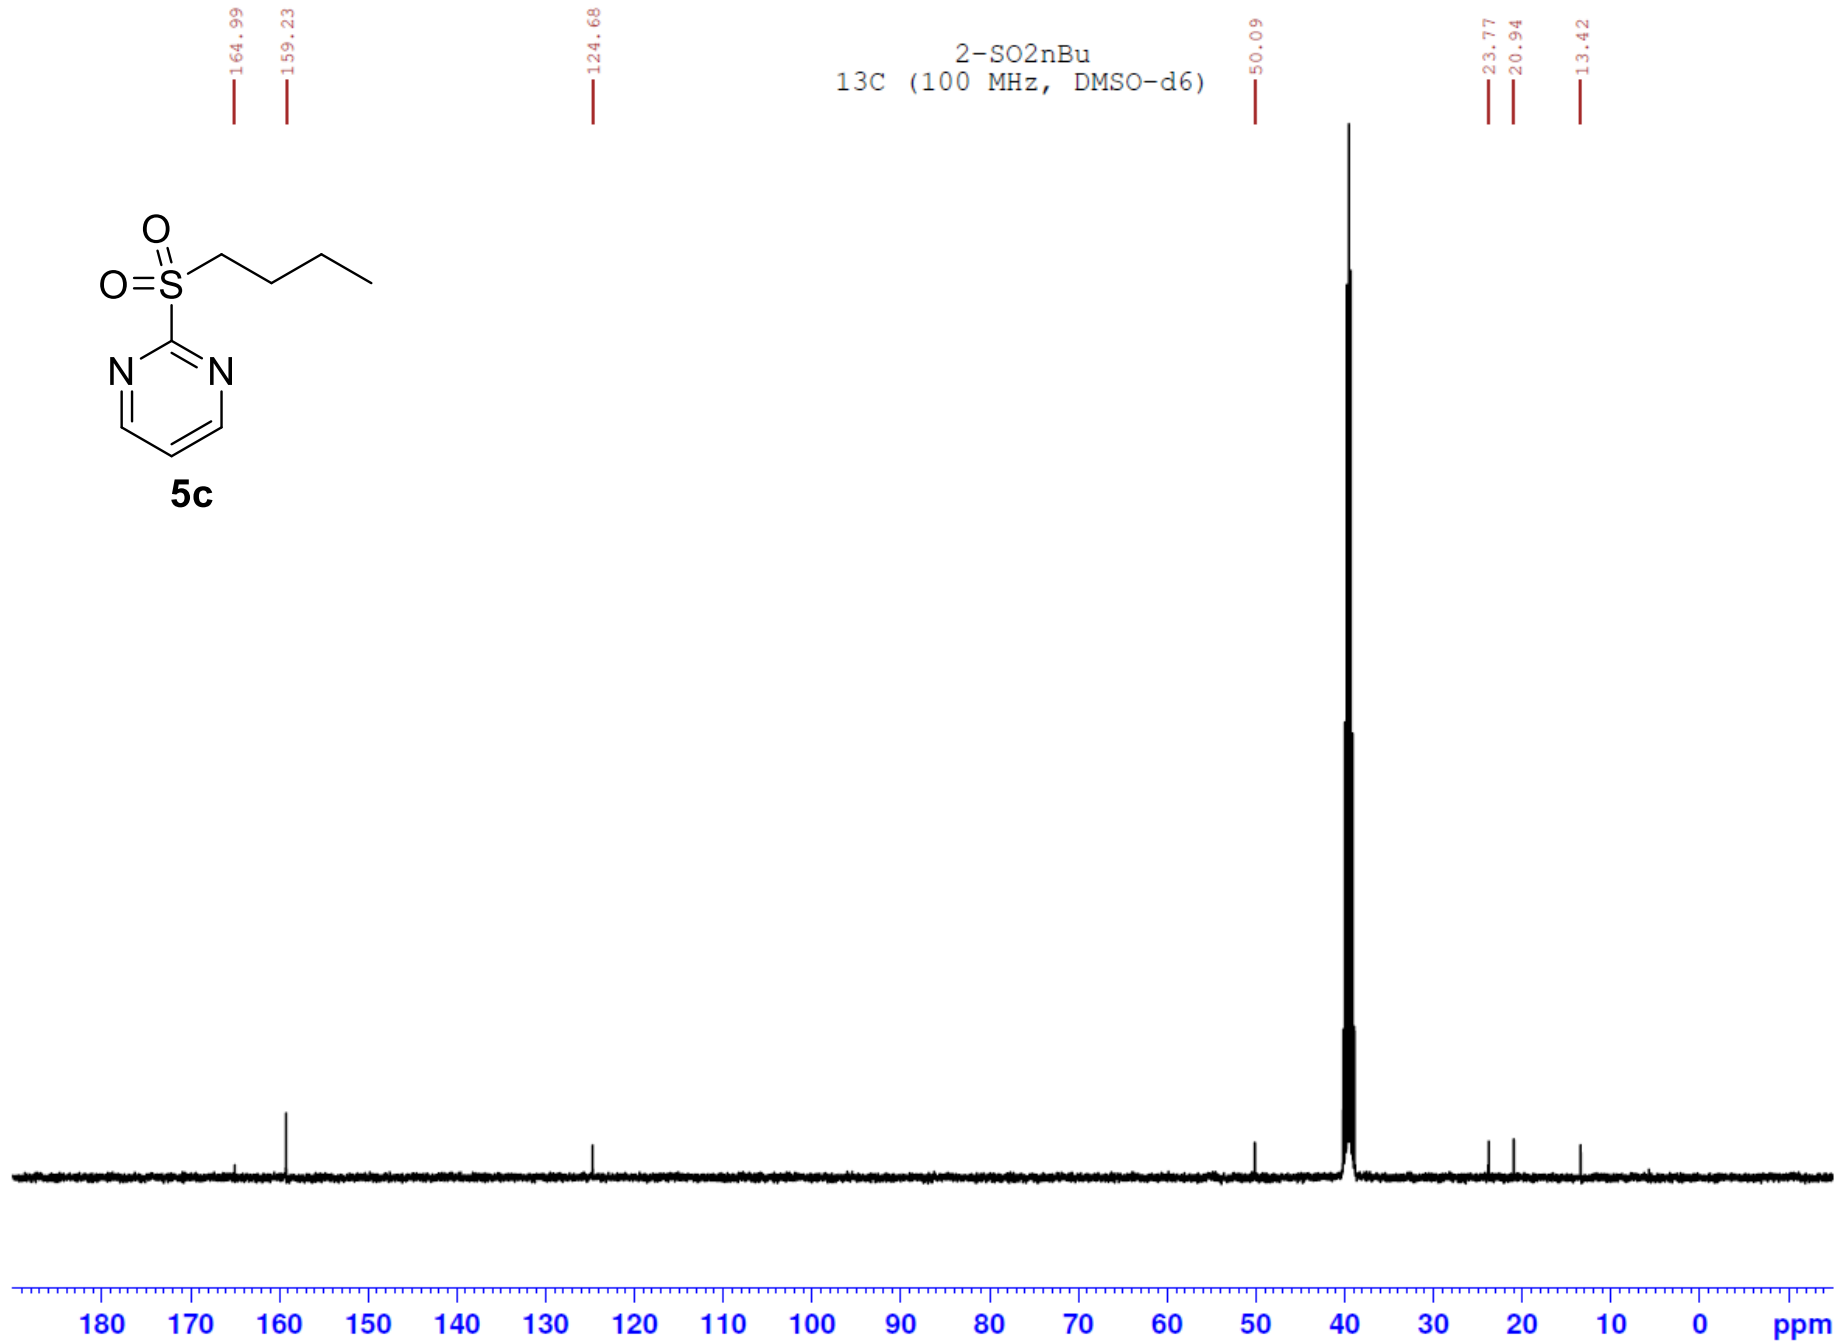

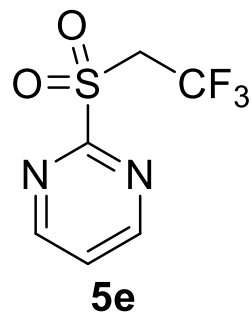

2-SO<sub>2</sub>CH<sub>2</sub>CF<sub>3</sub>  
1H (400 MHz, DMSO-d<sub>6</sub>)

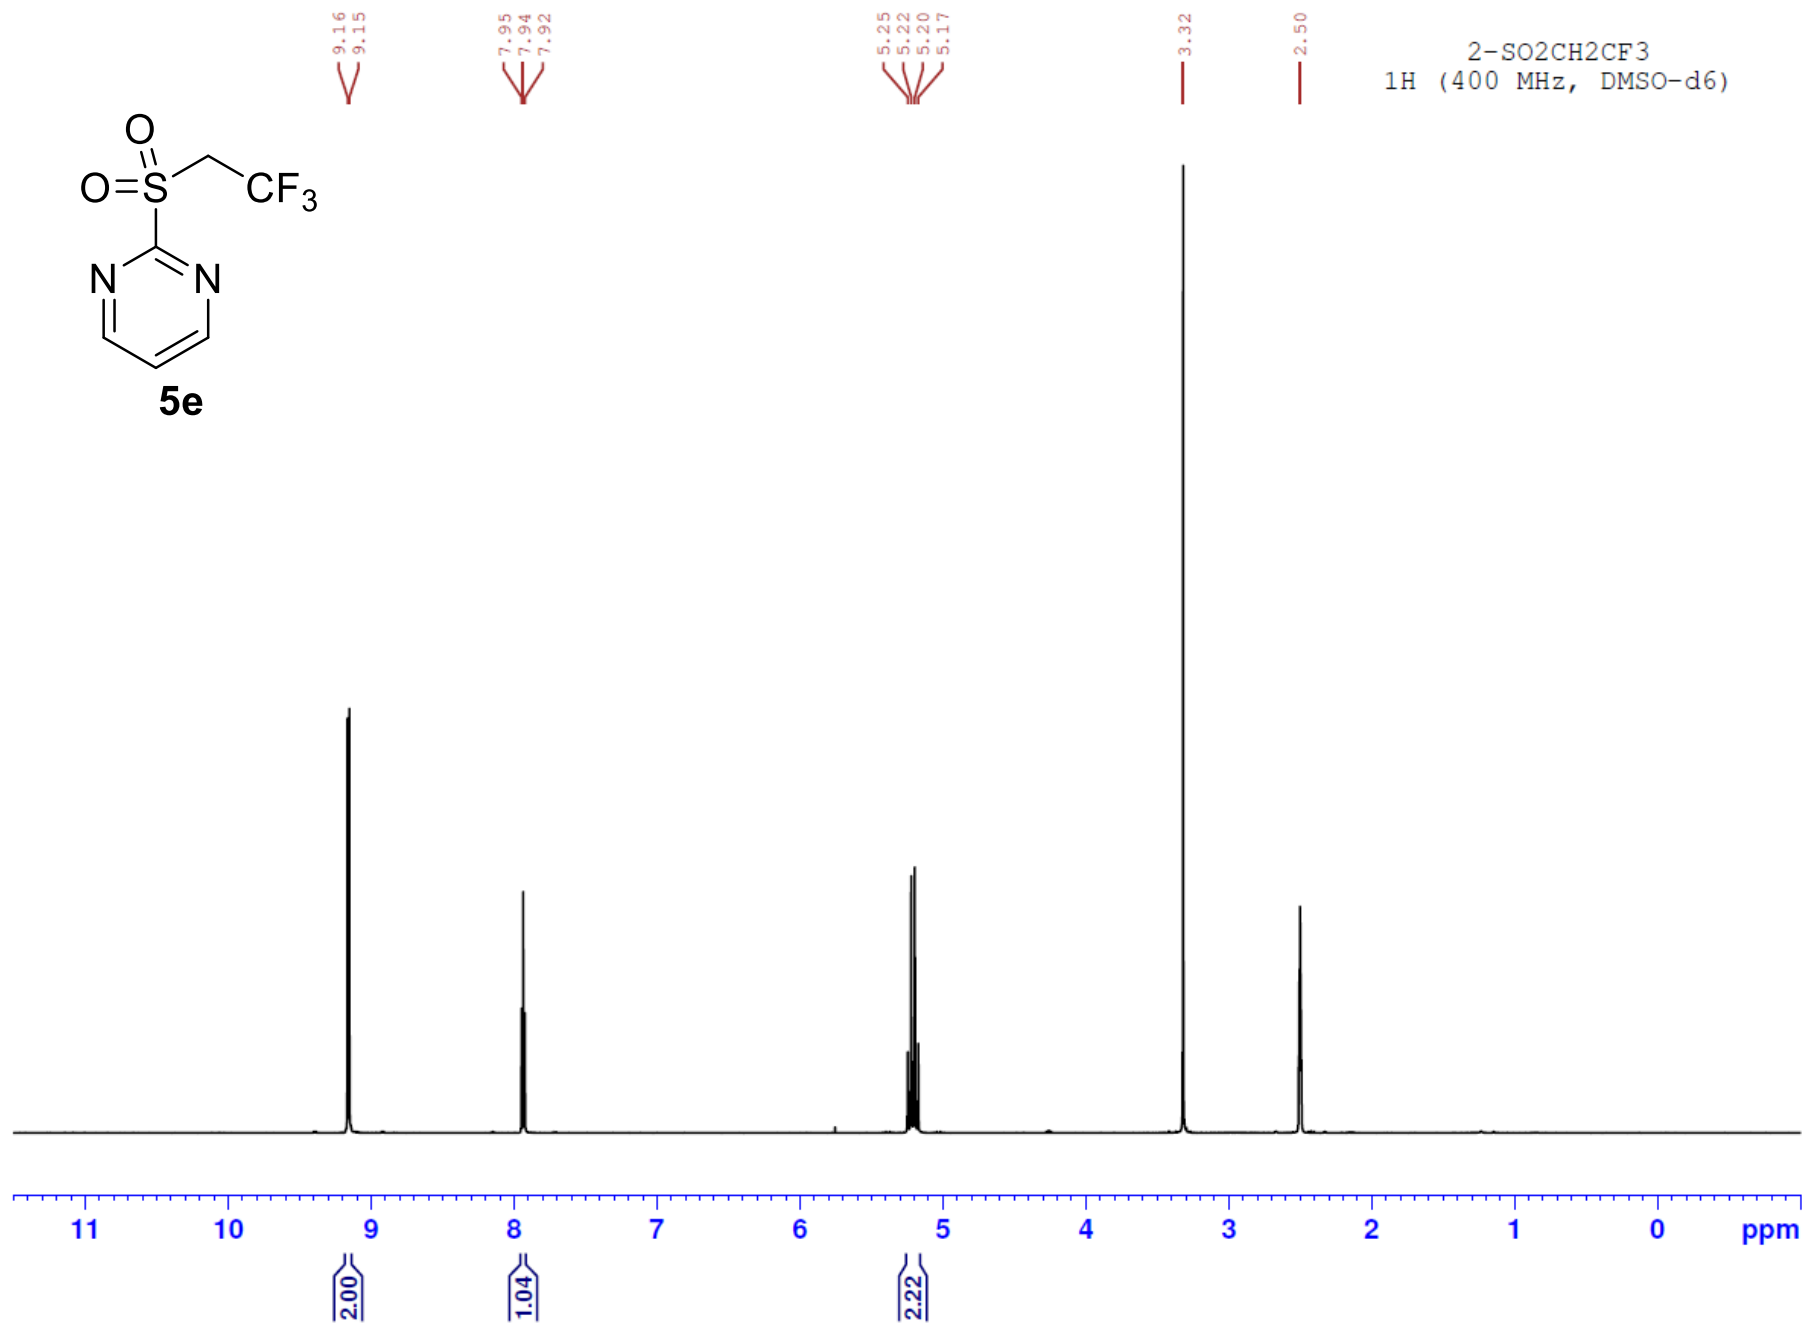



2-SO<sub>2</sub>CH<sub>2</sub>CF<sub>3</sub>  
13C (100 MHz, DMSO-d<sub>6</sub>)

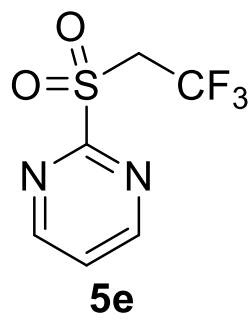

164.18  
159.51

125.28  
123.46

52.45  
52.14  
51.84  
51.55

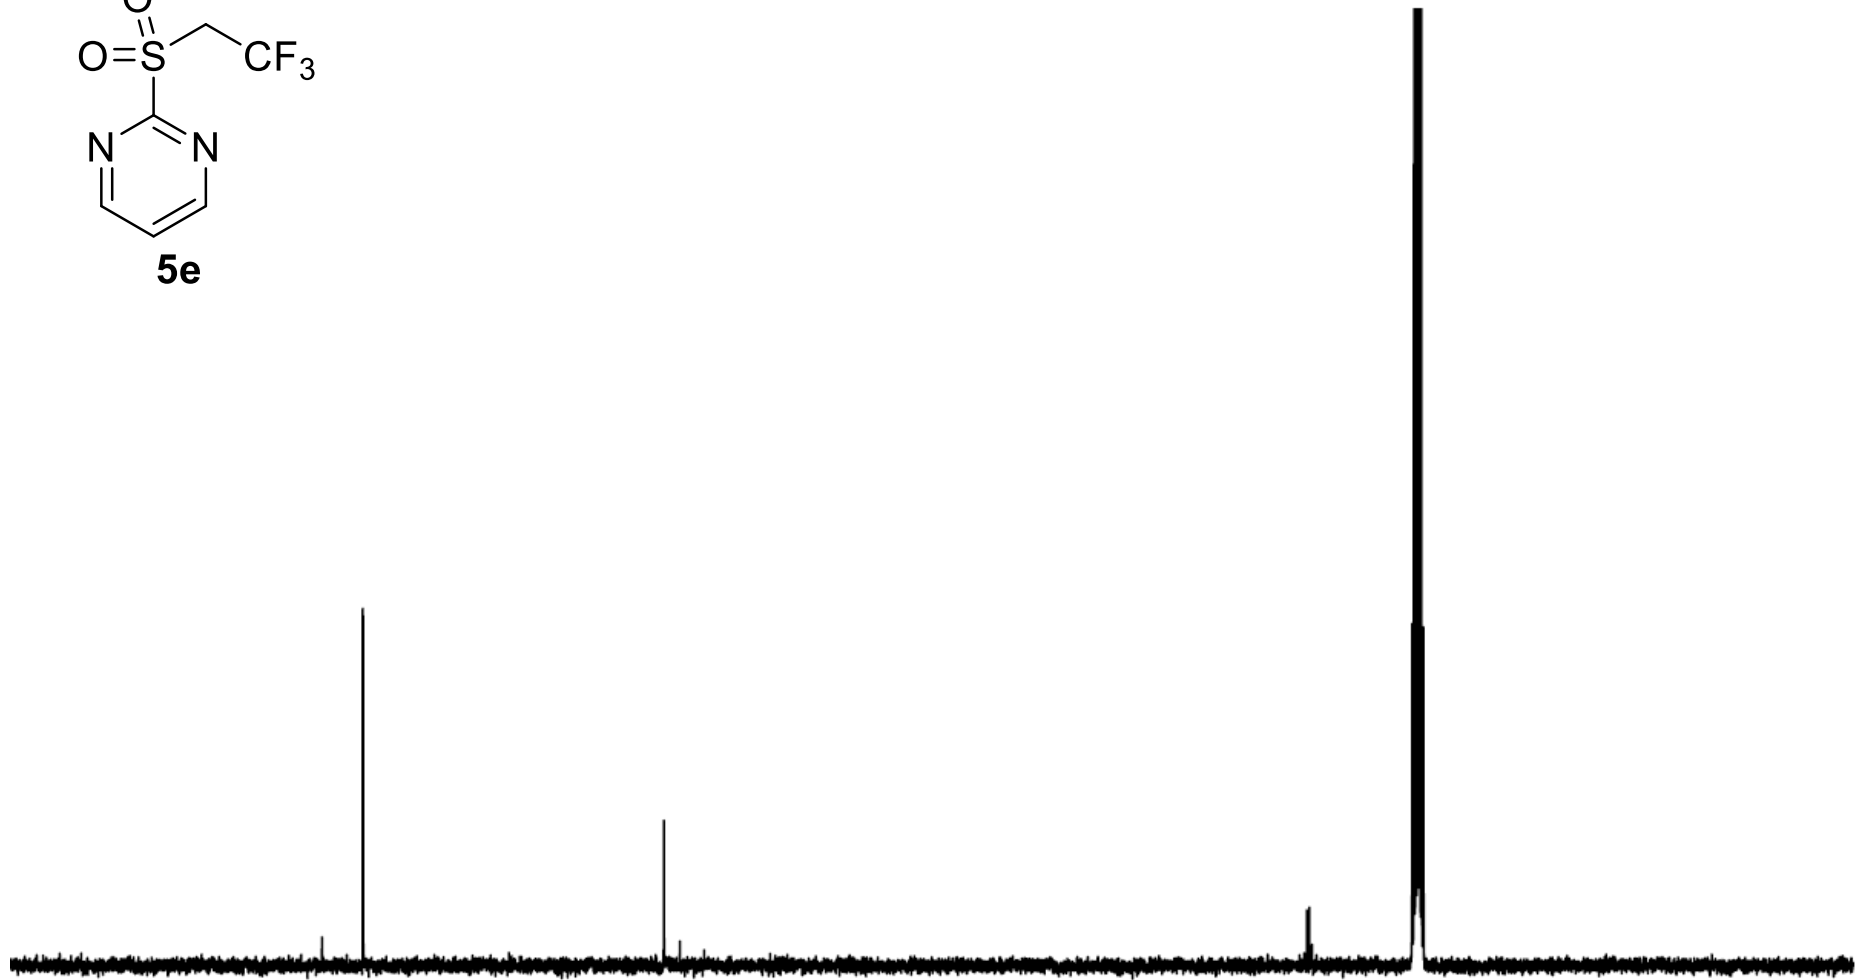

190 180 170 160 150 140 130 120 110 100 90 80 70 60 50 40 30 20 10 0 ppm

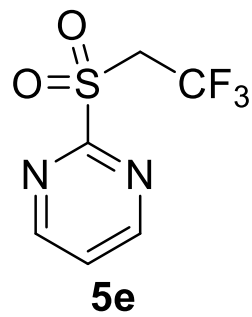

2-SO<sub>2</sub>CH<sub>2</sub>CF<sub>3</sub>  
19F (376 MHz, DMSO-d<sub>6</sub>)

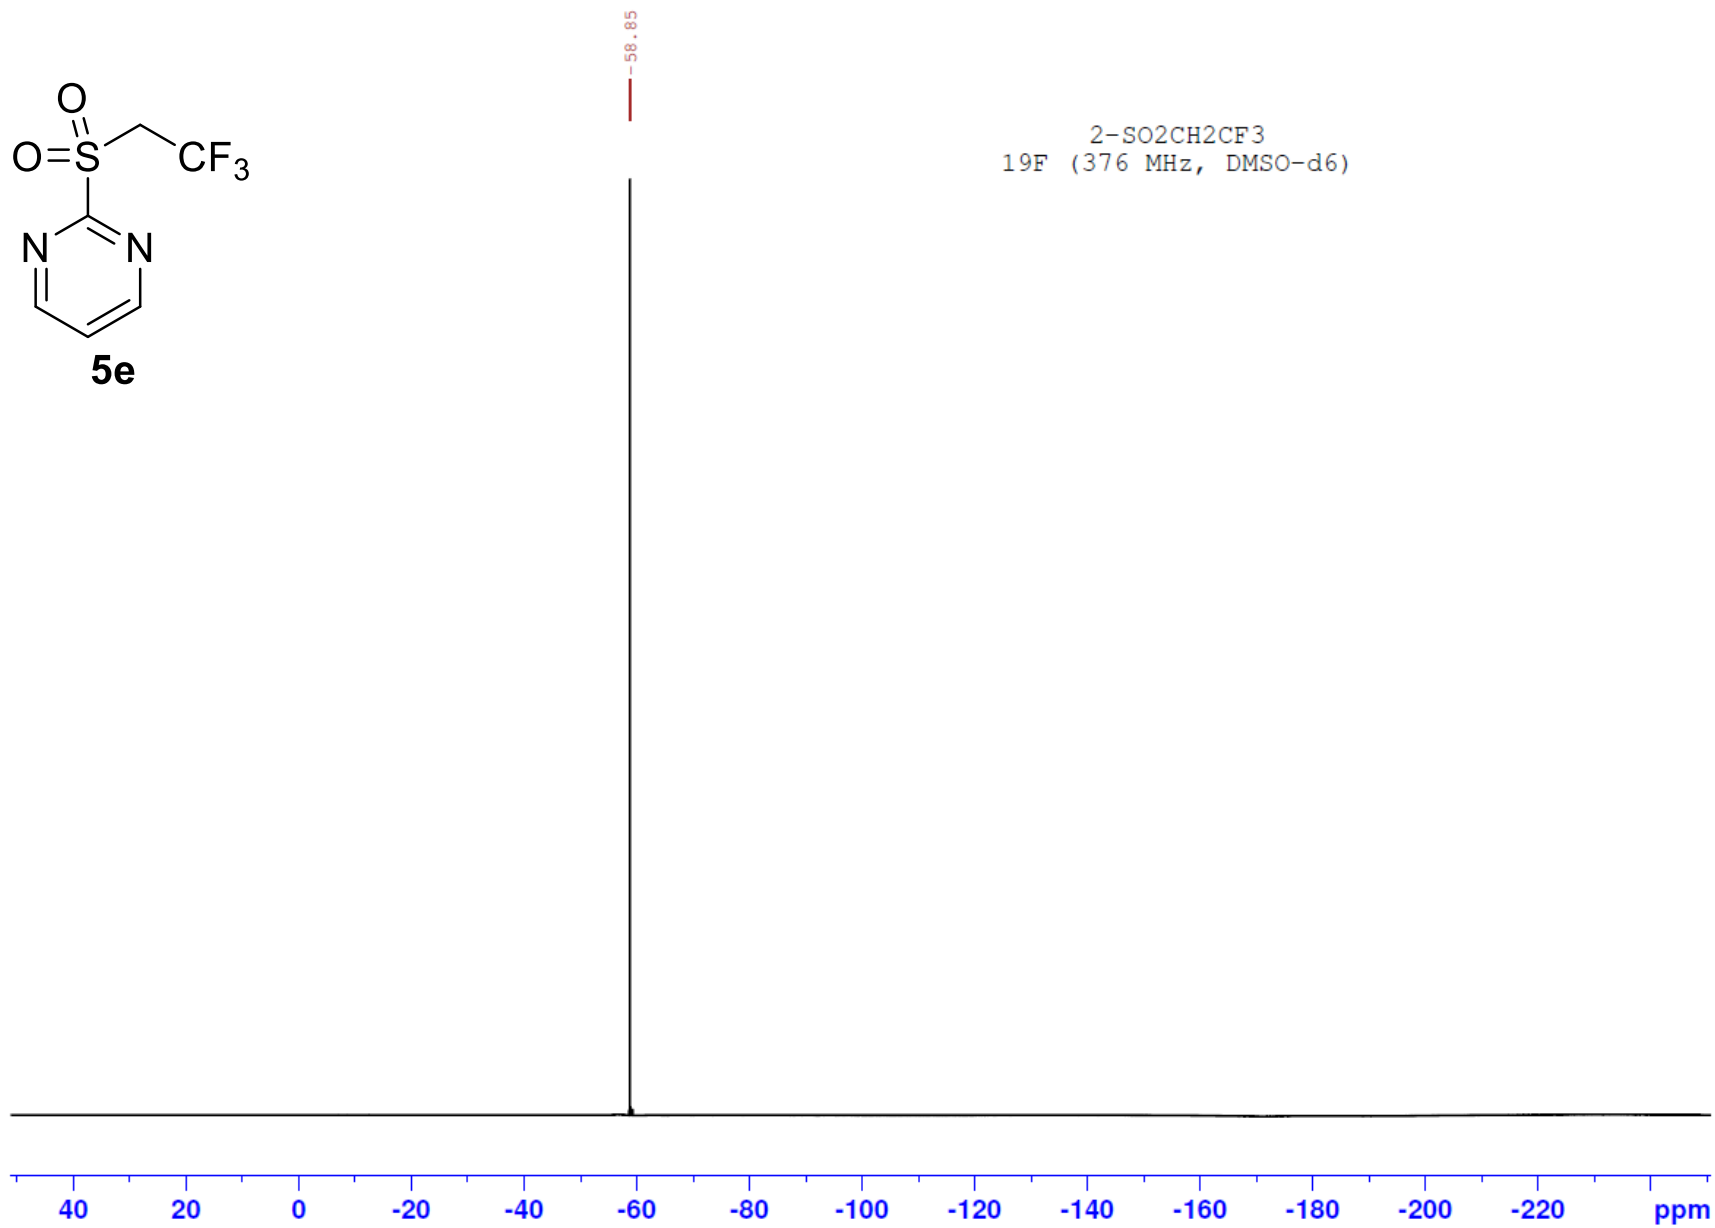

2-SO<sub>2</sub> (p-NO<sub>2</sub>Ph)  
1H (400 MHz, DMSO-d<sub>6</sub>)

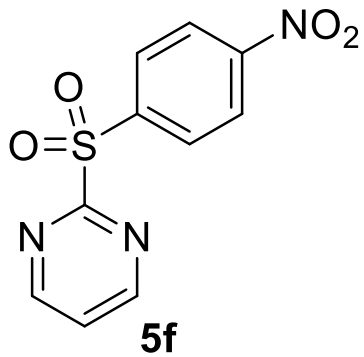

9.06  
9.05  
8.48  
8.46  
8.29  
8.27  
7.85  
7.84  
7.83

3.34

2.50

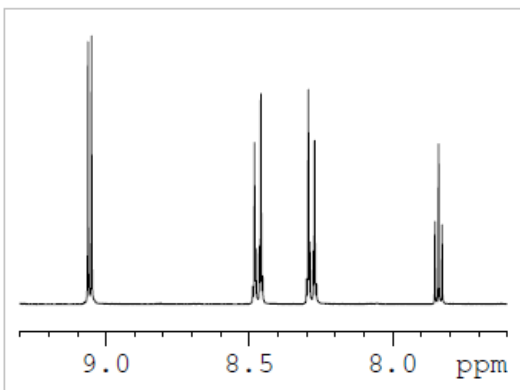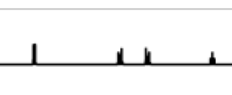

1.90  
2.07  
2.11  
1.00

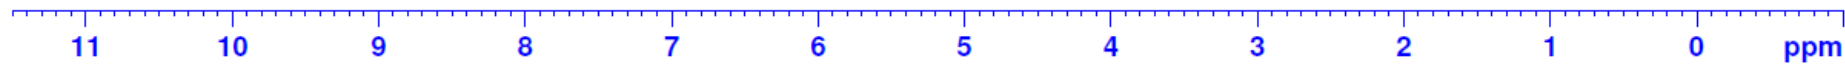

2-SO<sub>2</sub> (p-NO<sub>2</sub>Ph)  
13C (100 MHz, DMSO-d<sub>6</sub>)

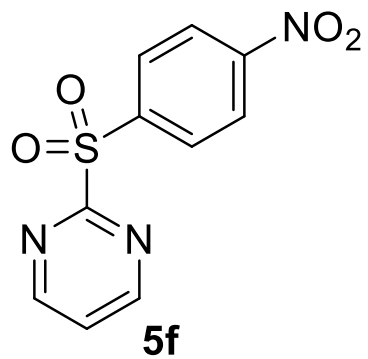

165.07  
159.53  
151.04  
142.57  
130.91  
124.94  
124.70

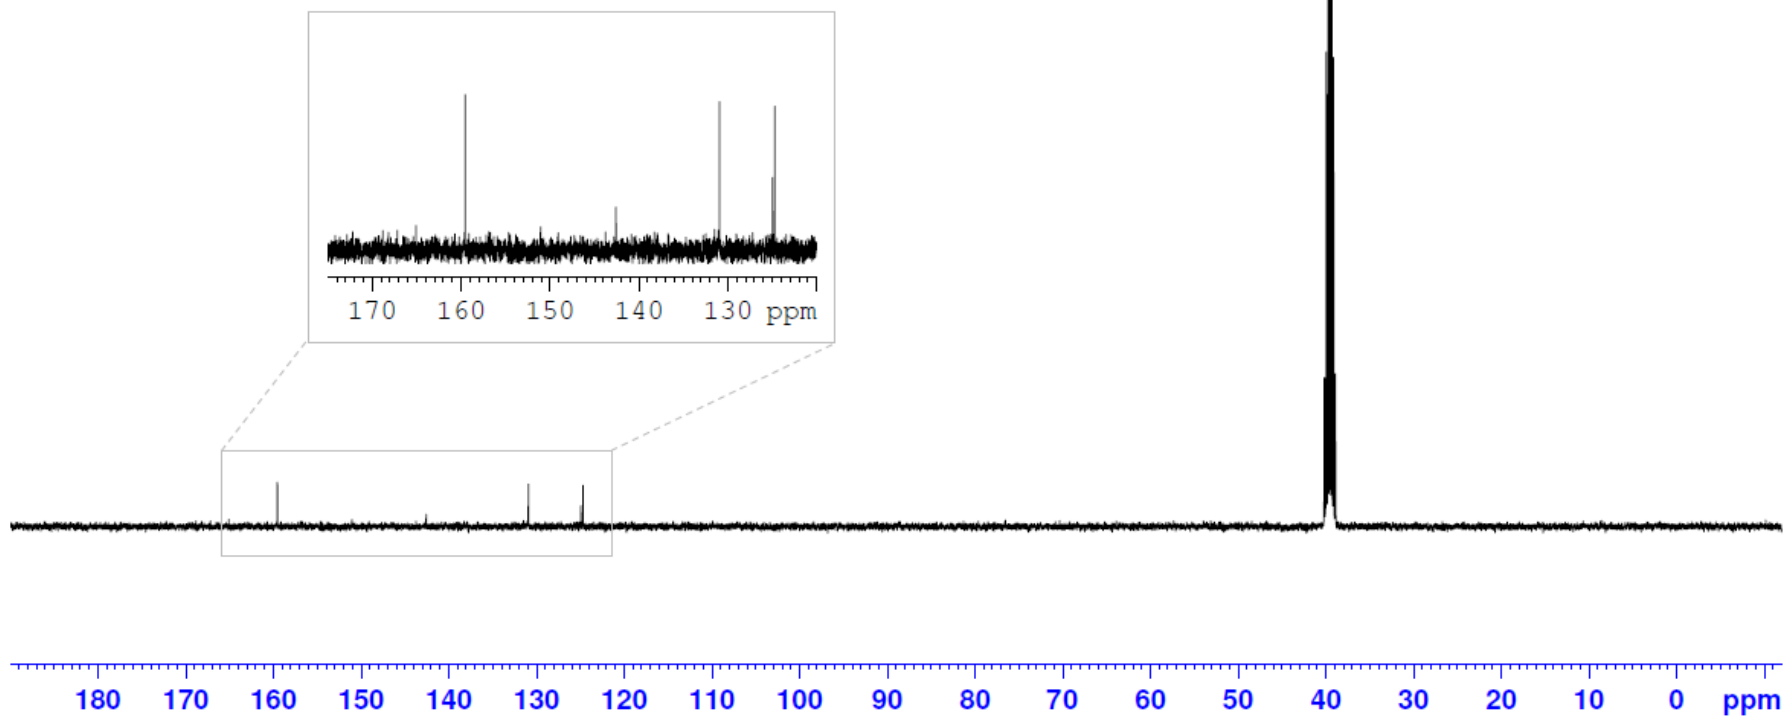

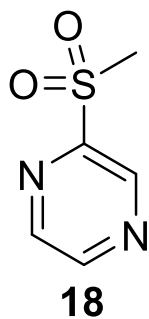

9.25  
9.25  
9.05  
9.04  
8.91  
8.91  
8.90

2-SO<sub>2</sub>Me pyrazine  
1H (400 MHz, DMSO-d<sub>6</sub>)

3.36  
3.32

2.50

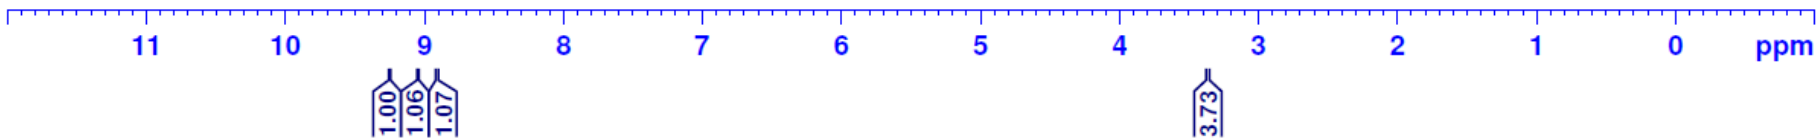

2-SMe Quinazoline  
1H NMR (400 MHz, DMSO-d6)

9.40  
9.40  
8.08  
8.08  
8.07  
8.06  
8.06  
8.06  
7.98  
7.96  
7.96  
7.94  
7.94  
7.94  
7.85  
7.85  
7.83  
7.82  
7.65  
7.65  
7.63  
7.63  
7.63  
7.61  
7.61

3.32

2.62  
2.50

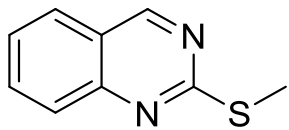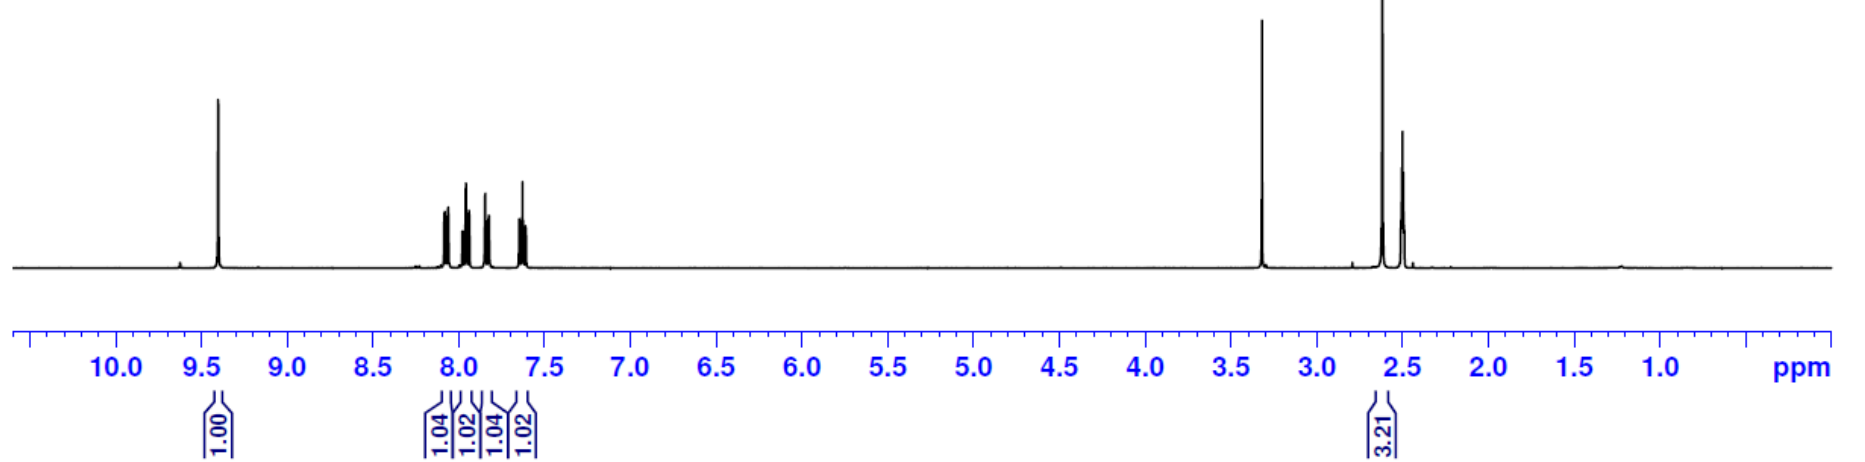

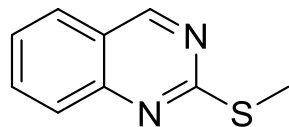

2-SMe quinazoline  
13C NMR (100 MHz, DMSO-d6)

167.87

160.89

149.97

135.07

128.16

126.56

126.17

122.02

13.67

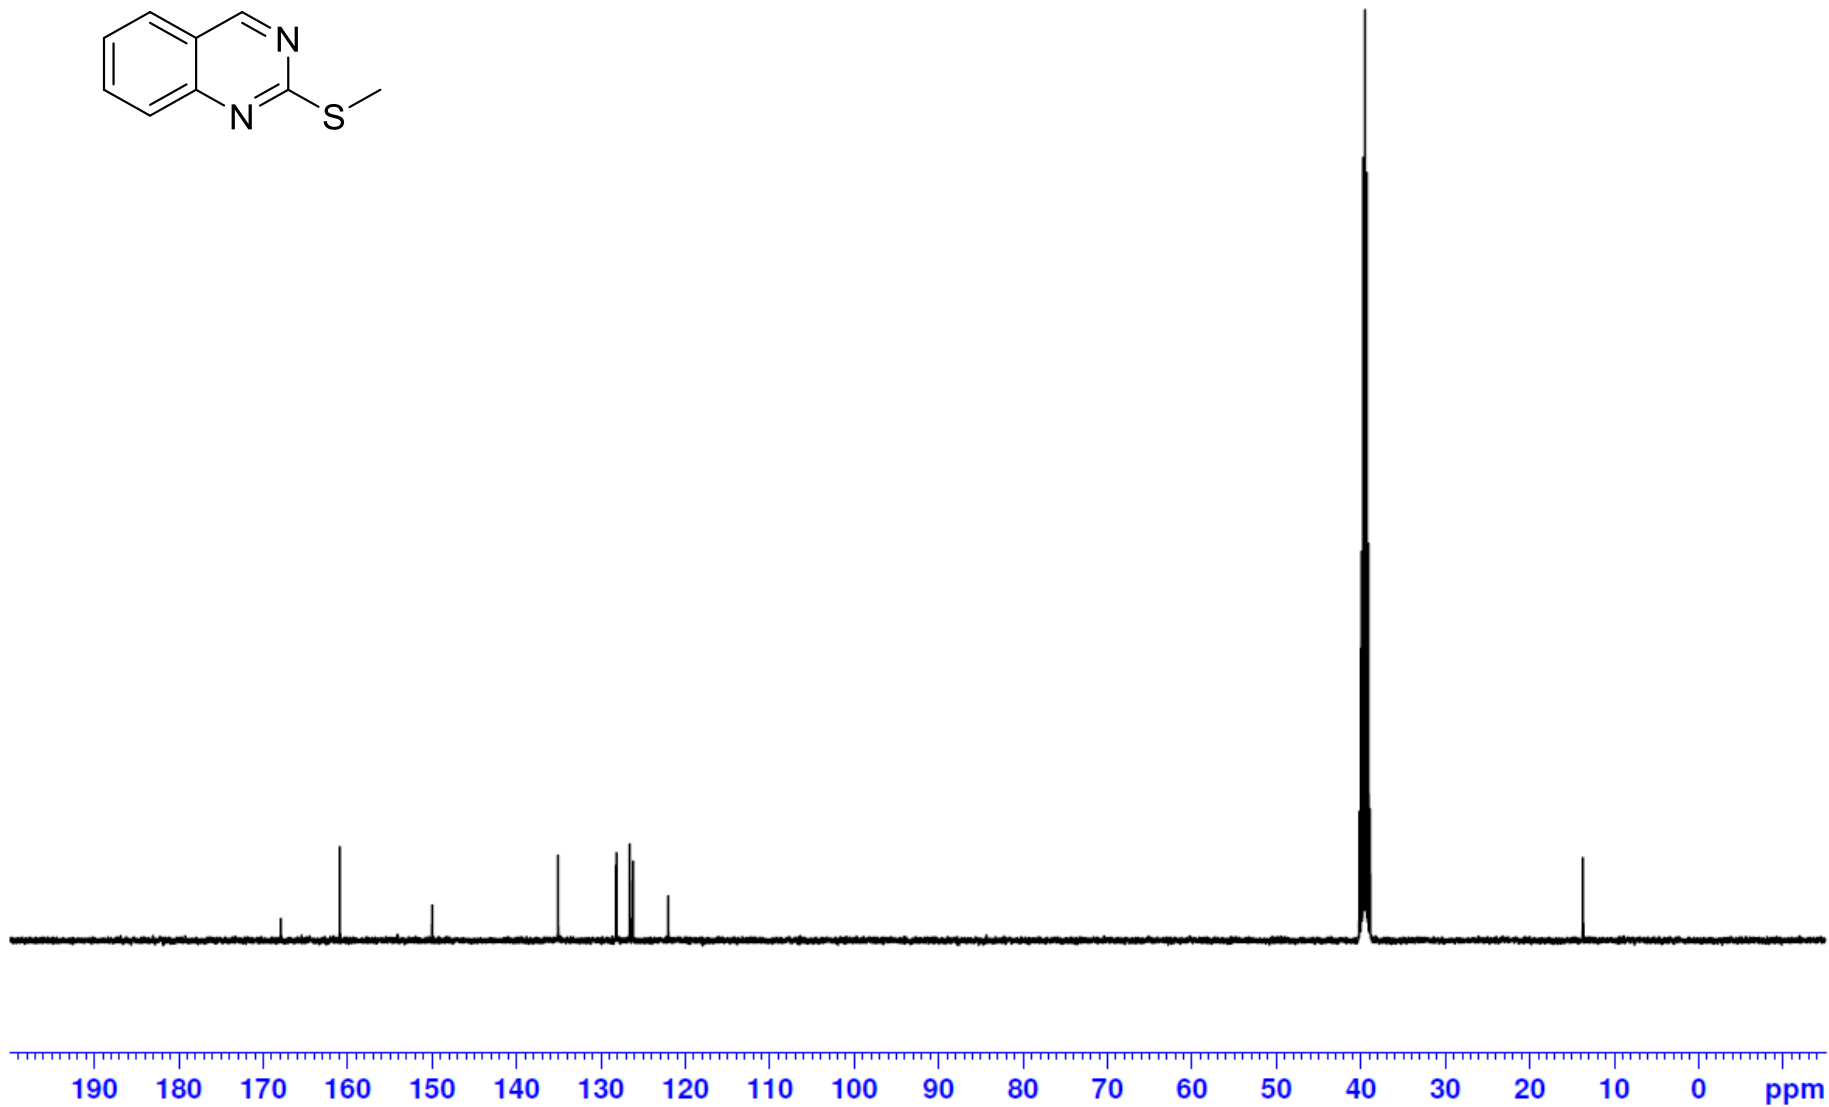

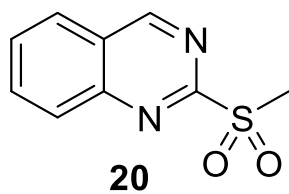

2-(methylsulfonyl)quinazoline  
1H (400 MHz, CDCl3)

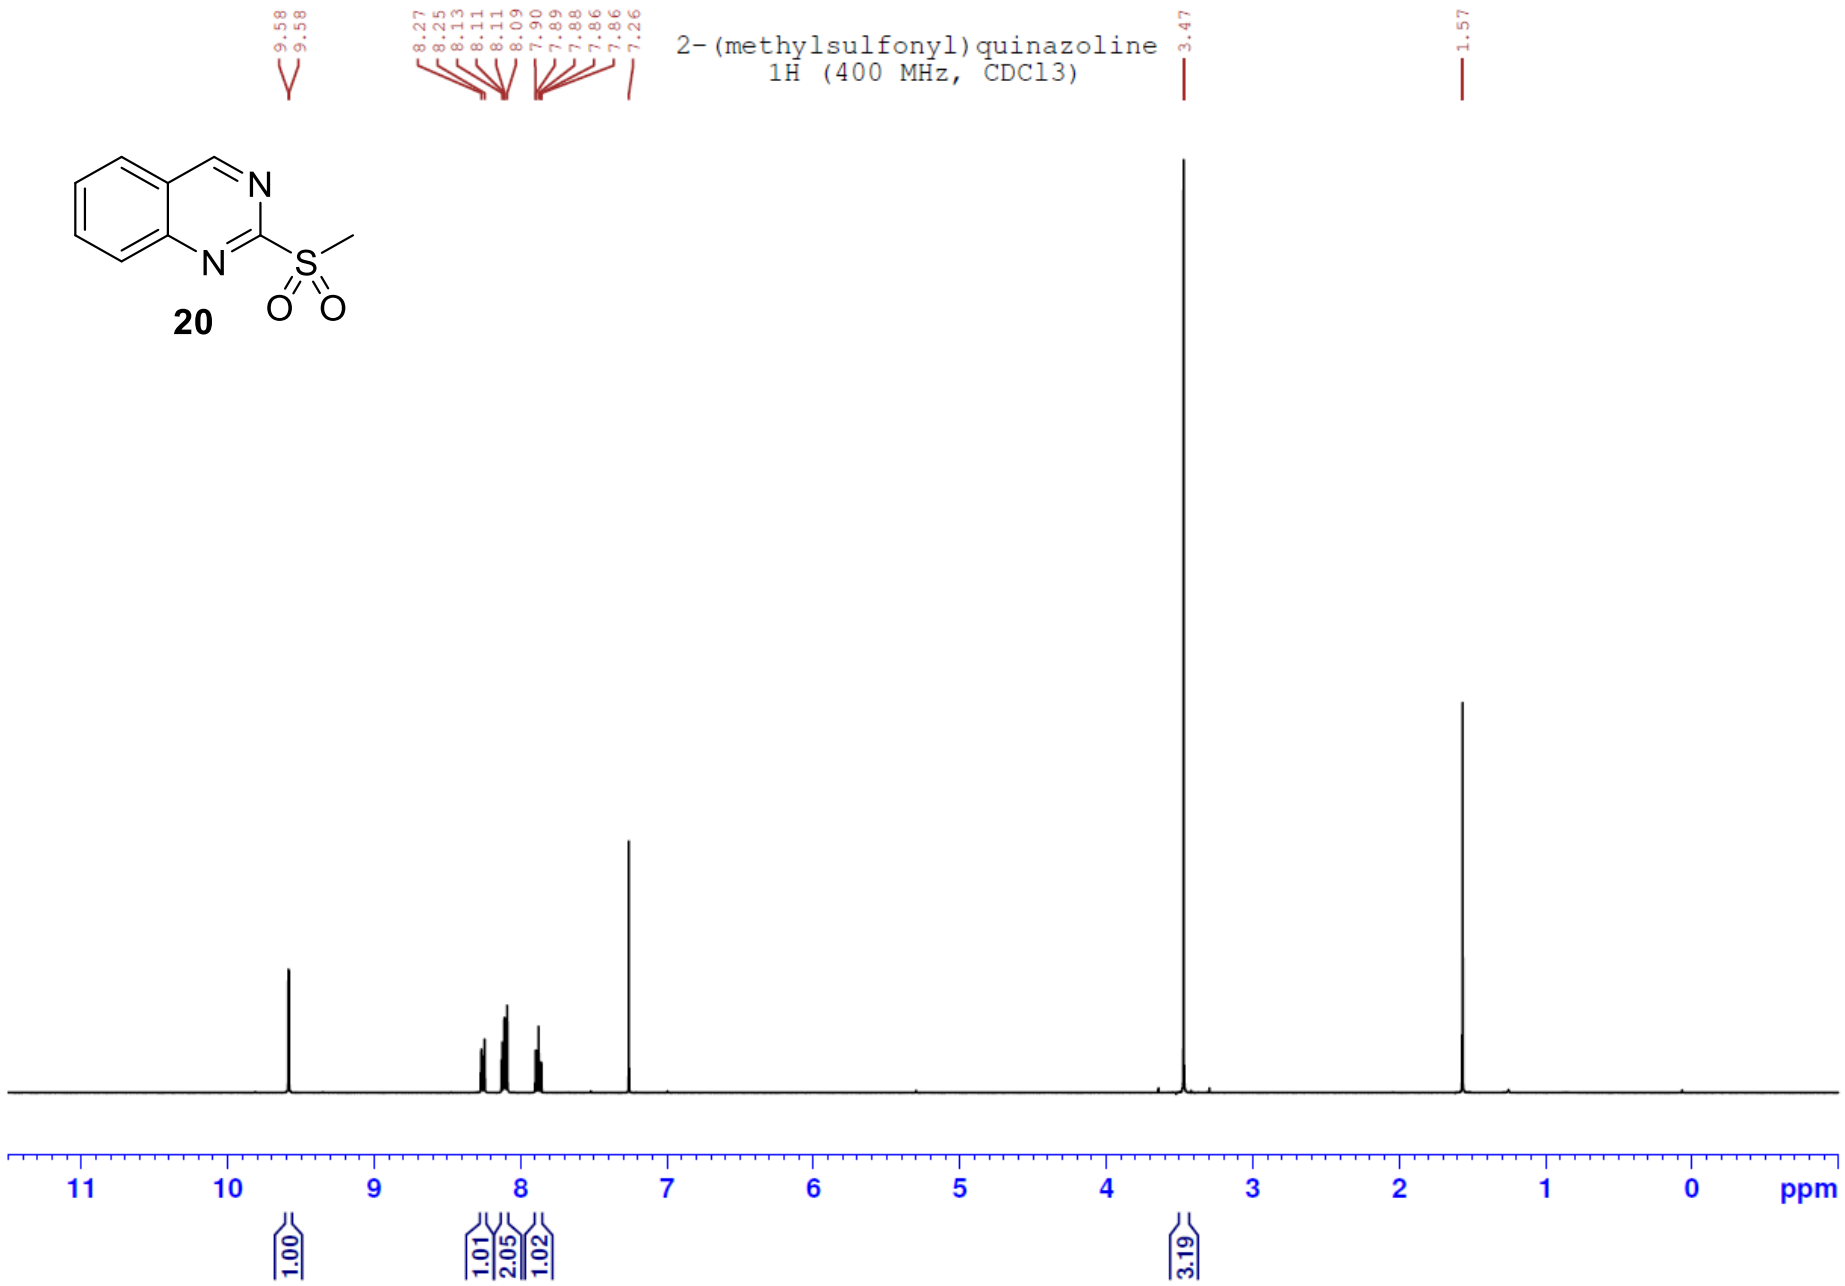

Supplement: bc3c00322_si_003.pdf [file bc3c00322_si_003.pdf]
